# Supplementary material for: Electrochemical chemoselective hydrogenation of 1,4-enediones with HFIP as the hydrogen donor: scalable access to 1,4-diketones
Source: Royal Society of Chemistry journal article supplement (doi:10.1039/d3ob01465g), 2023-01-01

## Electronic Supplementary Information

### Table of Contents

|                                                        |    |
|--------------------------------------------------------|----|
| 1. General information .....                           | 1  |
| 2. General preparation of 1,4-enedione compounds ..... | 2  |
| 3. General preparation of 1,4-dione compounds .....    | 3  |
| 4. Optimization of reaction conditions .....           | 4  |
| 5. Gram-scale reaction .....                           | 5  |
| 6. Decagram-scale reaction .....                       | 7  |
| 7. Deuteration gram-scale reaction .....               | 8  |
| 8. Cyclic voltammetry study .....                      | 9  |
| 9. Synthetic applications .....                        | 12 |
| 10. Proposed reaction mechanism.....                   | 15 |
| 11. Unsuccessful substrates.....                       | 21 |
| 12. NMR spectra for the obtained compound .....        | 22 |
| 13. References.....                                    | 35 |
| 14. NMR spectra .....                                  | 37 |

## 1. General information

All reactions were carried out in sealed air using oven dried glassware. 1,1,1,3,3,3-hexafluoro-2-propanol, 1,2-dichloroethane, tetrabutylammonium perchlorate, and graphite felt are all available from commercial sources. Deionized water is obtained by ultra pure water machine. The electrochemical instrument is HONGSHENGFENG DPS-305BM. Column chromatography was performed on silica gel (200-300 mesh). NMR spectra were recorded in CDCl<sub>3</sub> on 500 MHz spectrometers. <sup>1</sup>H NMR chemical shifts (δ) are reported in parts per million relative to tetramethylsilane (0 ppm). The following abbreviations are used for multiplicities: s = singlet, d = doublet, t = triplet, q = quartet, dd = doublet of doublets, dt = doublet of triplets, and m = multiplet. HRMS were obtained on an Ultima Global spectrometer with an ESI source. Melting points are uncorrected.

## 2. General preparation of 1,4-enedione compounds

### Method :

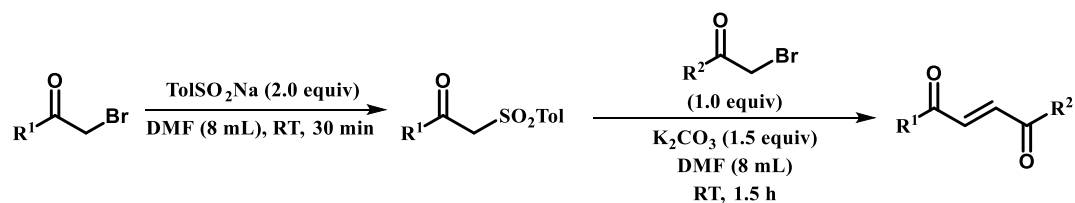

**Scheme S1.** General preparation of 1,4-enedione compounds

### Method:

Generally procedure for the 1,4-enedione compounds: add DMF (8 mL) into a 25 mL flask  $\alpha$ -Bromoacetophenone (4.0 mmol), and then aromatic sodium sulfonate (8.0 mmol) was added at room temperature. The reaction mixture was stirred for 30 min. Dilute with brine (50 mL) and extract the mixture with EtOAc (3 x 20 mL). The combined organic layers were washed with brine, dried, filtered, and evaporated to afford intermediates in nearly quantitative yields. Without further purification,  $K_2CO_3$  (7.5 mmol), the resulting intermediates (4.0 mmol),  $\alpha$ -Bromoacetophenone (4.0 mmol) was added to DMF (8 mL) at RT. The reaction mixture was stirred at RT for 2 h. The solvent was diluted with water (50 mL) and the mixture was extracted with EtOAc (3 x 20 mL). The combined organic layers were washed with brine, dried, filtered, and evaporated to afford crude product. Purification on silica gel (PE/ EA = 20/1~10/1) afforded the desired 1,4-enedione as a yellow solid.

### 3. General preparation of 1,4-dione compounds

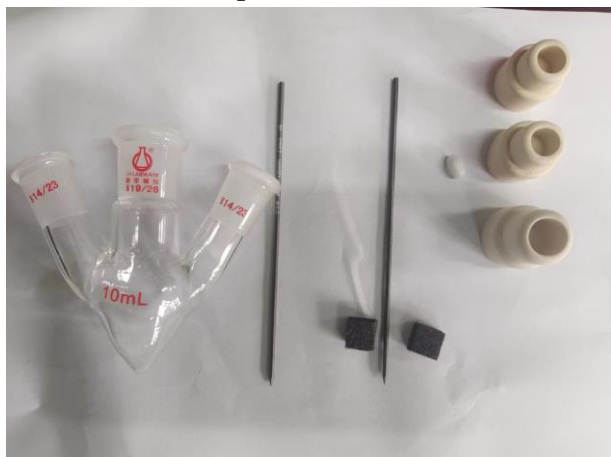

Figure S1. Components required for the reaction

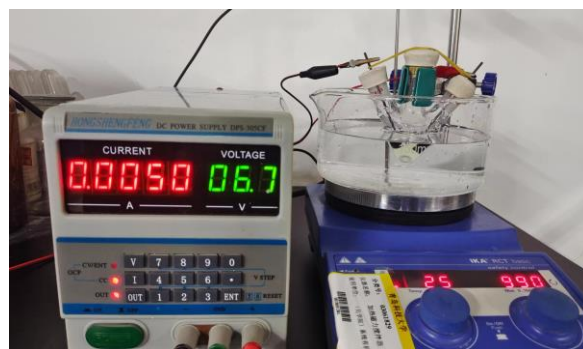

Figure S2. Typical reaction set up

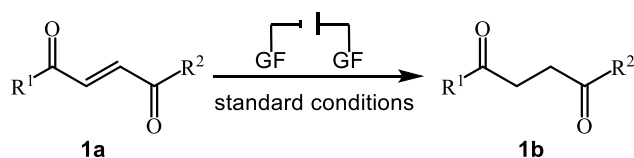

To the mixed solution of dichloroethane (4.5 mL), HFIP (0.5 mL), and 100  $\mu\text{L}$  water, 1,4-enedione **1a** (0.1 mmol, 1.0 eq.) and tetrabutylammonium perchlorate (0.2 mmol, 2.0 eq.) were added. Equipped with graphite felt (10  $\times$  10  $\times$  5 mm) as an anode, graphite felt (10  $\times$  10  $\times$  5 mm) as a cathode, non-separating electrolytic cell device. The reaction mixture was stirred at constant current of 5 mA at 20  $^\circ\text{C}$  in the Air for 2 hours. After the reaction (monitored by TLC), the reaction system was dried with anhydrous  $\text{MgSO}_4$ , filtered, and concentrated under reduced pressure. The residue was purified by silica gel column chromatography and eluted with petroleum ether and ethyl acetate (PE/EA = 15:1).

#### 4. Optimization of reaction conditions

**Table S1.** Screening of solvents

| Entry | Deviation from standard conditions <sup>a</sup>    | Yield (%) <sup>b</sup> |
|-------|----------------------------------------------------|------------------------|
| 1     | HFIP instead of solvent                            | 70%                    |
| 2     | DCE instead of solvent                             | 15%                    |
| 3     | CH <sub>3</sub> CN instead of solvent              | 8%                     |
| 4     | THF instead of solvent                             | 11%                    |
| 5     | acetone instead of solvent                         | trace                  |
| 6     | DMSO instead of solvent                            | n.r. <sup>c</sup>      |
| 7     | CH <sub>3</sub> NO <sub>2</sub> instead of solvent | 10%                    |
| 8     | DMF instead of solvent                             | n.d. <sup>d</sup>      |
| 9     | HFIP : DCM = 0.5 : 4.5                             | 83%                    |
| 10    | HFIP : acetone = 0.5 : 4.5                         | 60%                    |
| 11    | Acetone : DCE = 0.5 : 4.5                          | 20%                    |
| 12    | DMSO : DCE = 0.5 : 4.5                             | 28%                    |
| 13    | HFIP : DCE = 1 : 4                                 | 92%                    |
| 14    | HFIP : DCE = 2 : 3                                 | 89%                    |
| 15    | HFIP : DCE = 3 : 2                                 | 68%                    |
| 16    | HFIP : DCE = 4 : 1                                 | 69%                    |

<sup>a</sup>Standard condition: graphite felt anode (10 mm × 10 mm × 5 mm), graphite felt cathode (10 mm × 10 mm × 5 mm), undivided cell, constant current = 5 mA, **1a** (0.1 mmol), electrolyte (2.0 eq.), DCE = 4.5 mL, HFIP = 0.5 mL, H<sub>2</sub>O = 0.1 mL, 20 °C, Air, RT, 2 h (3.73 F·mol<sup>-1</sup>), <sup>b</sup>Isolated yields, <sup>c</sup>n.r. = not reaction, <sup>d</sup>n.d. = not detected.

**Table S2.** Screening of H<sub>2</sub>O

| Entry | Deviation from standard conditions <sup>a</sup> | Yield (%) <sup>b</sup> |
|-------|-------------------------------------------------|------------------------|
| 1     | No H <sub>2</sub> O                             | 68%                    |
| 2     | 10 μL H <sub>2</sub> O                          | 83%                    |
| 3     | 50 μL H <sub>2</sub> O                          | 92%                    |
| 4     | 150 μL H <sub>2</sub> O                         | 86%                    |

<sup>a</sup>Standard condition: graphite felt anode (10 mm × 10 mm × 5 mm), graphite felt cathode (10 mm × 10 mm × 5 mm), undivided cell, constant current = 5 mA, **1a** (0.1 mmol), electrolyte (2.0 eq.), DCE = 4.5 mL, HFIP = 0.5 mL, H<sub>2</sub>O = 0.1 mL, 20 °C, Air, 2 h (3.73 F·mol<sup>-1</sup>), <sup>b</sup>Isolated yields.

**Table S3.** Screening of electrode

| Entry | Deviation from standard conditions <sup>a</sup> | Yield (%) <sup>b</sup> |
|-------|-------------------------------------------------|------------------------|
| 1     | GF(+) / Pt(-)                                   | 67%                    |
| 2     | GF(+) / C(-)                                    | 83%                    |

<sup>a</sup>Standard condition: graphite felt anode (10 mm × 10 mm × 5 mm), graphite felt cathode (10 mm × 10 mm × 5 mm), undivided cell, constant current = 5 mA, **1a** (0.1 mmol), electrolyte (2.0 eq.), DCE = 4.5 mL, HFIP = 0.5 mL, H<sub>2</sub>O = 0.1 mL, 20 °C, Air, RT, 2 h (3.73 F·mol<sup>-1</sup>), <sup>b</sup>Isolated yields.

**Table S4.** Screening of electrolyte

| Entry | Deviation from standard conditions <sup>a</sup>                                                   | Yield (%) <sup>b</sup> |
|-------|---------------------------------------------------------------------------------------------------|------------------------|
| 1     | <i>n</i> -Bu <sub>4</sub> NPF <sub>6</sub> instead of <i>n</i> -Bu <sub>4</sub> NCIO <sub>4</sub> | 68%                    |
| 2     | <i>n</i> -Bu <sub>4</sub> NBF <sub>4</sub> instead of <i>n</i> -Bu <sub>4</sub> NCIO <sub>4</sub> | 62%                    |
| 3     | <i>n</i> -Bu <sub>4</sub> NI instead of <i>n</i> -Bu <sub>4</sub> NCIO <sub>4</sub>               | trace                  |
| 4     | <i>n</i> -Bu <sub>4</sub> NBr instead of <i>n</i> -Bu <sub>4</sub> NCIO <sub>4</sub>              | trace                  |
| 5     | <i>n</i> -Bu <sub>4</sub> NOAc instead of <i>n</i> -Bu <sub>4</sub> NCIO <sub>4</sub>             | 55%                    |
| 6     | Et <sub>4</sub> NPF <sub>6</sub> instead of <i>n</i> -Bu <sub>4</sub> NCIO <sub>4</sub>           | 52%                    |
| 7     | Me <sub>4</sub> NPF <sub>6</sub> instead of <i>n</i> -Bu <sub>4</sub> NCIO <sub>4</sub>           | 24%                    |

<sup>a</sup>Standard condition: graphite felt anode (10 mm × 10 mm × 5 mm), graphite felt cathode (10 mm × 10 mm × 5 mm), undivided cell, constant current = 5 mA, **1a** (0.1 mmol), electrolyte (2.0 eq.), DCE = 4.5 mL, HFIP = 0.5 mL, H<sub>2</sub>O = 0.1 mL, 20 °C, Air, RT, 2 h (3.73 F·mol<sup>-1</sup>), <sup>b</sup>Isolated yields.

**Table S5.** Screening of other hydrogen donor

| Entry | Deviation from standard conditions <sup>a</sup>                               | Yield (%) <sup>b</sup> |
|-------|-------------------------------------------------------------------------------|------------------------|
| 1     | Cheng's condition: <sup>12a</sup> D <sub>2</sub> O as hydrogen donor          | trace                  |
| 2     | Cheng's condition: <sup>12b</sup> NH <sub>3</sub> as hydrogen donor           | trace                  |
| 3     | Xia's condition: <sup>12c</sup> MeOH and NH <sub>4</sub> Cl as hydrogen donor | trace                  |
| 4     | Huang's condition: <sup>12d</sup> DMSO and H <sub>2</sub> O as hydrogen donor | trace                  |
| 5     | Wen's condition: <sup>12e</sup> MeOH as hydrogen donor                        | trace                  |

<sup>a</sup>Standard condition: graphite felt anode (10 mm × 10 mm × 5 mm), graphite felt cathode (10 mm × 10 mm × 5 mm), undivided cell, constant current = 5 mA, **1a** (0.1 mmol), electrolyte (2.0 eq.), DCE = 4.5 mL, HFIP = 0.5 mL, H<sub>2</sub>O = 0.1 mL, 20 °C, Air, RT, 2 h (3.73 F·mol<sup>-1</sup>), <sup>b</sup>Isolated yields.

## 5. Gram-scale reaction

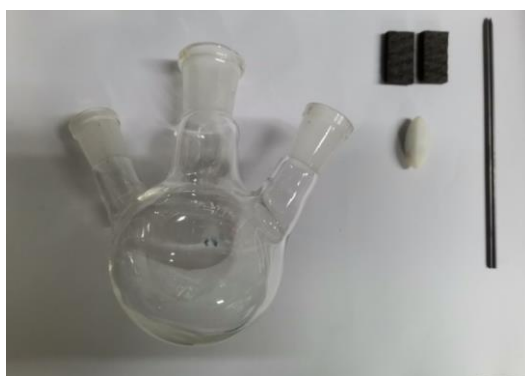

**Figure S3.** Components required for gram-scale reaction

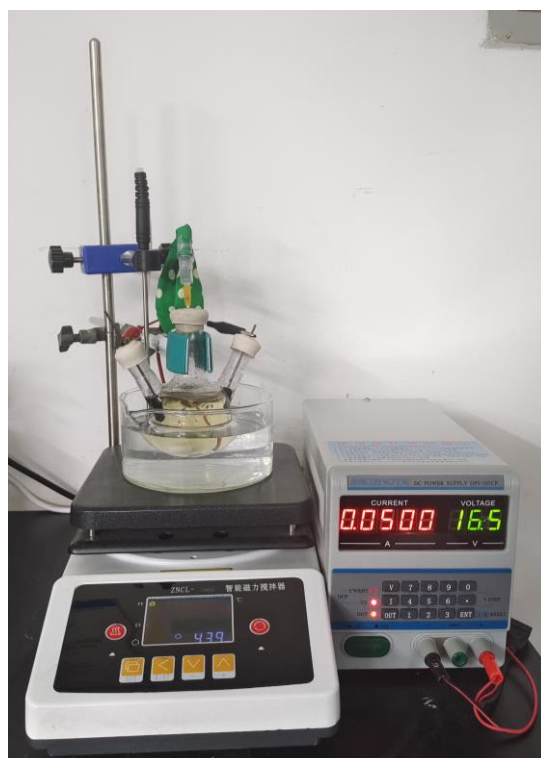

**Figure S4.** Typical reaction set up for gram-scale reaction

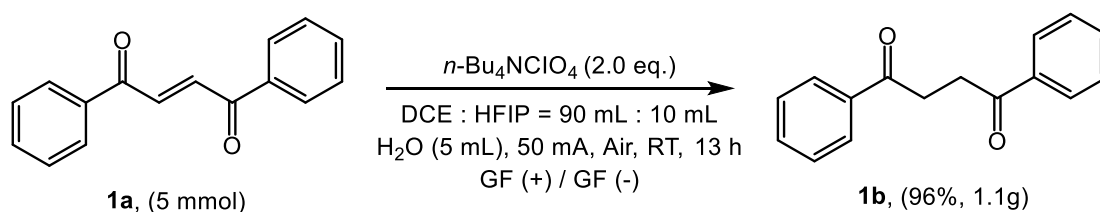

To the mixed solution of dichloroethane (90 mL), HFIP (10 mL), and 5 mL water, 1,4-enedione **1a** (5 mmol, 1.0 eq.) and tetrabutylammonium perchlorate (10 mmol, 2.0 eq.) were added. Equipped with graphite felt (20mm × 10mm × 5 mm) as anode, graphite felt (20mm × 10mm × 5 mm) as cathode, non-separating electrolytic cell device. The reaction mixture was stirred at constant current of 50 mA at 20 °C in the Air for 13 hours. After the reaction (monitored by TLC), the reaction system was dried with anhydrous MgSO<sub>4</sub>, filtered, and concentrated under reduced pressure. The residue was purified by silica gel column chromatography and eluted with petroleum ether and ethyl acetate (PE/EA = 15:1).

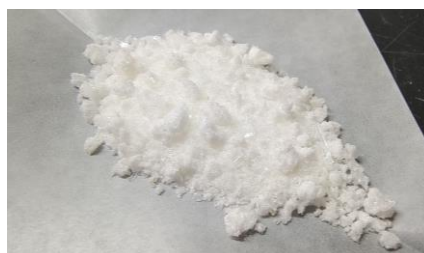

**Figure S5.** Pure product

## 6. Decagram-scale reaction

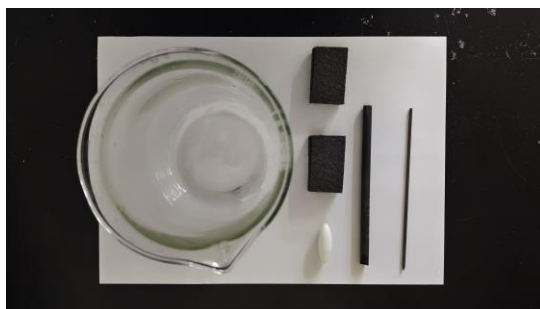

**Figure S6.** Components required for decagram-scale reaction

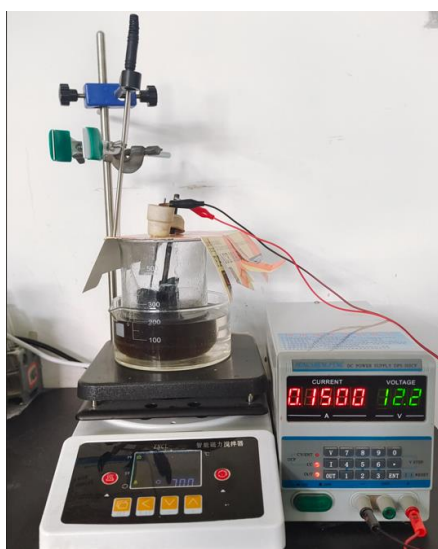

**Figure S7.** Typical reaction set up for decagram-scale reaction

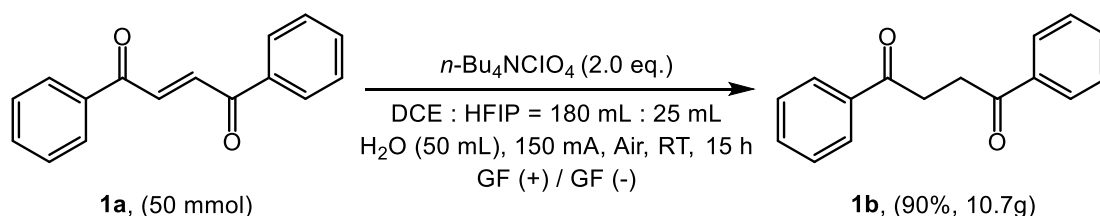

To the mixed solution of dichloroethane (180 mL), HFIP (25 mL), and 50 mL water, 1,4-enedione **1a** (50 mmol, 1.0 eq.) and tetrabutylammonium perchlorate (100 mmol, 2.0 eq.) were added. Equipped with graphite felt (40mm × 20mm × 10 mm) as anode, graphite felt (40mm × 20mm × 10 mm) as cathode, non-separating electrolytic cell device. The reaction mixture was stirred at constant current of 150 mA at 20 °C in Air for 15 hours. After the reaction (monitored by TLC), the reaction system was dried with anhydrous  $\text{MgSO}_4$ , filtered and concentrated under reduced pressure. The residue was purified by silica gel column chromatography and eluted with petroleum ether and ethyl acetate (PE/EA = 15:1).



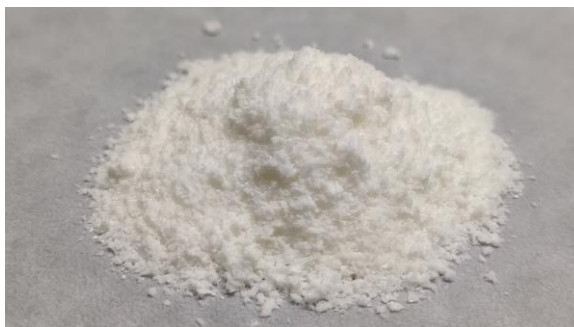

**Figure S8.** Pure product

### 7. Deuteration gram-scale reaction

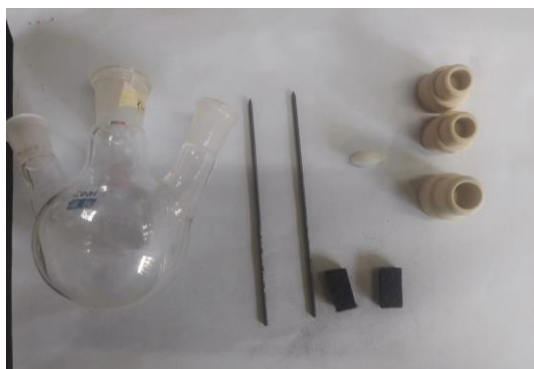

**Figure S9.** Components required for deuteration gram-scale reaction

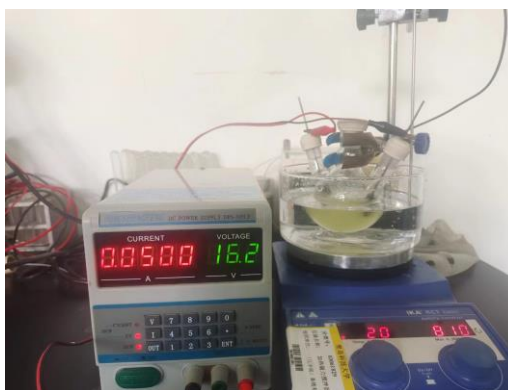

**Figure S10.** Typical reaction set up for deuteration gram-scale reaction

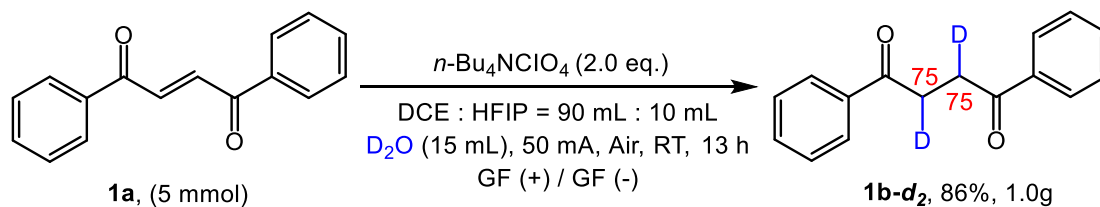

To the mixed solution of dichloroethane (90 mL), HFIP (10 mL), and 15 mL D<sub>2</sub>O, 1,4-enedione **1a** (5 mmol, 1.0 eq.) and tetrabutylammonium perchlorate (10 mmol, 2.0 eq.) were added. Equipped with graphite felt (20mm × 10mm × 5 mm) as anode, graphite felt (20mm × 10mm × 5 mm) as cathode, non-separating electrolytic cell device. The reaction mixture was stirred at

constant current of 50 mA at 20 °C in Air for 13 hours. After the reaction (monitored by TLC), the reaction system was dried with anhydrous  $\text{MgSO}_4$ , filtered and concentrated under reduced pressure. The residue was purified by silica gel column chromatography and eluted with petroleum ether and ethyl acetate (PE/ EA = 15:1).

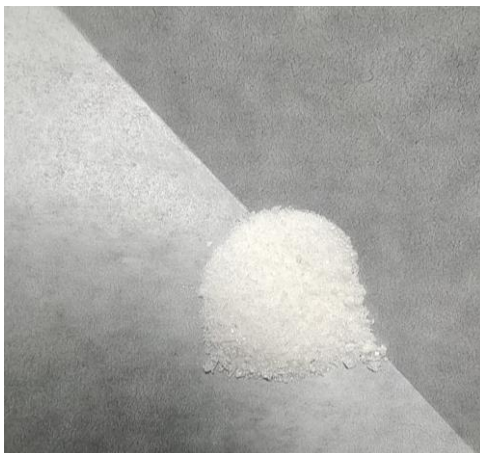

**Figure S11.** Pure product

### 8. Cyclic voltammetry study

The cyclic voltammetry experiments were carried out with a computer-controlled electrochemical analyzer for electrochemical measurements. The data was collected with the CS300H potentiostat (Wuhan Coster Instrument Co., LTD).

**Working electrode:** The working electrode is a 3 mm diameter glassy carbon working electrode. Polished with 0.05  $\mu\text{m}$  aluminum oxide and then sonicated in distilled water and ethanol before measurements.

**Reference electrode:** The reference electrode is SCE (saturated aqueous KCl) that was washed with water and ethanol before measurements.

**Counter electrode:** The counter electrode is a platinum wire that was polished with 0.05  $\mu\text{m}$  aluminum oxide and then sonicated in distilled water and ethanol before measurements.

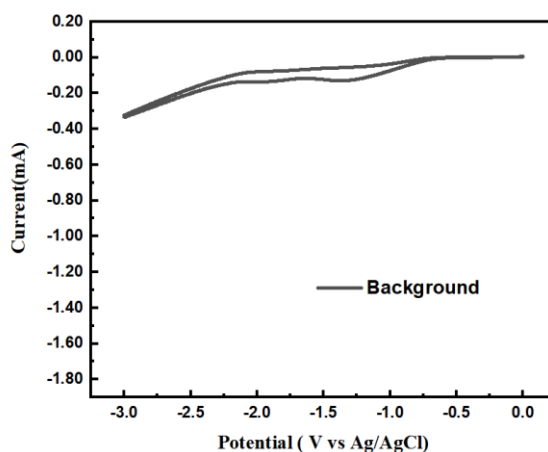

**Figure S12.** Cyclic voltammogram of **blank** sample

**General procedure for cyclic voltammetry (CV):** Cyclic voltammogram of **blank** sample was performed in a three-electrode cell at room temperature. The working electrode was a steady glassy carbon, the counter electrode was a platinum wire, and the reference was an Ag/AgCl electrode submerged in saturated aqueous KCl solution. A solution of *n*-Bu<sub>4</sub>NClO<sub>4</sub> (0.2 mmol) in 5 mL DCE and 0.1 mL H<sub>2</sub>O was subject to cyclic voltammetry experiment. The scan rate was 100 mV/s, ranging from -3.0 V to 0.0 V.

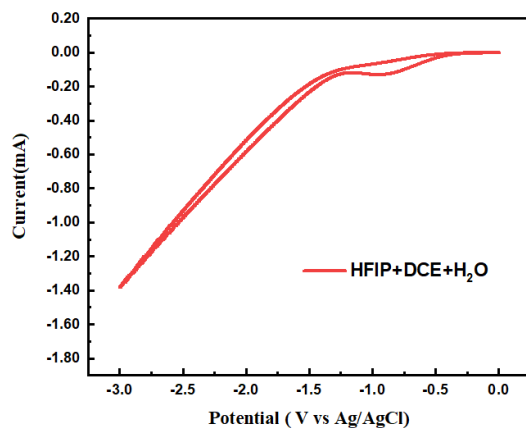

**Figure S13.** Cyclic voltammogram of HFIP

**General procedure for cyclic voltammetry (CV):** Cyclic voltammogram of HFIP was performed in a three-electrode cell at room temperature. The working electrode was a steady glassy carbon, the counter electrode was a platinum wire, and the reference was an Ag/AgCl electrode submerged in saturated aqueous KCl solution. A solution of *n*-Bu<sub>4</sub>NClO<sub>4</sub> (0.2 mmol) in 4.5 mL DCE, 0.5 mL HFIP and 0.1 mL H<sub>2</sub>O was subject to cyclic voltammetry experiment. The scan rate was 100 mV/s, ranging from -3.0 V to 0.0 V.

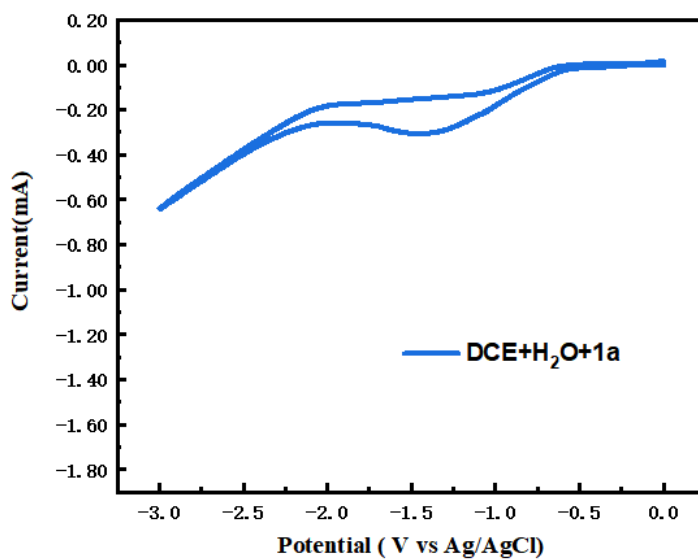

**Figure S14.** Cyclic voltammogram of 1a

**General procedure for cyclic voltammetry (CV):** Cyclic voltammogram of **1a** was performed in a three-electrode cell at room temperature. The working electrode was a steady glassy carbon, the counter electrode was a platinum wire, and the reference was an Ag/AgCl electrode submerged in saturated aqueous KCl solution. A solution of **1a** (0.1 mmol) and *n*-Bu<sub>4</sub>NClO<sub>4</sub> (0.2 mmol) in 5.0 mL DCE and 0.1 mL H<sub>2</sub>O was subject to cyclic voltammetry experiment. The scan rate was 100 mV/s, ranging from -3.0 V to 0.0 V.

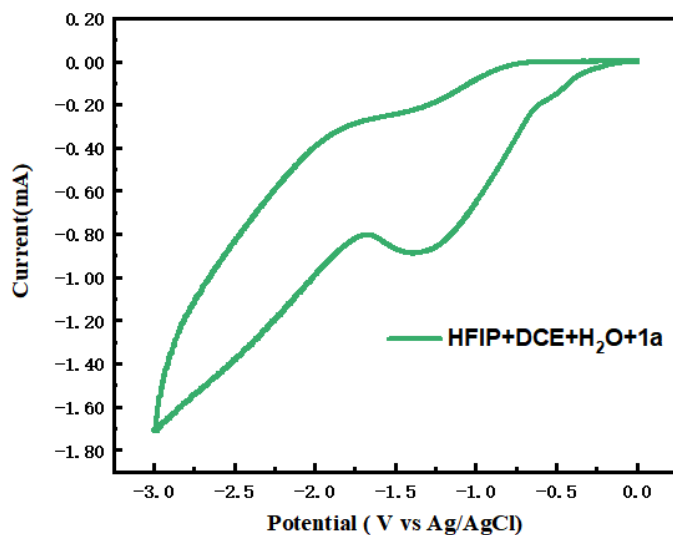

**Figure S15.** Cyclic voltammograms of **1a** and HFIP

**General procedure for cyclic voltammetry (CV):** Cyclic voltammograms of **1a** and HFIP were performed in a three-electrode cell at room temperature. The working electrode was a steady glassy carbon, the counter electrode was a platinum wire, and the reference was an Ag/AgCl electrode submerged in saturated aqueous KCl solution. A solution of **1a** (0.1 mmol) and *n*-Bu<sub>4</sub>NClO<sub>4</sub> (0.2 mmol) in 4.5 mL DCE, 0.5 mL HFIP and 0.1 mL H<sub>2</sub>O was subject to cyclic voltammetry experiment. The scan rate was 100 mV/s, ranging from -3.0 V to 0.0 V.

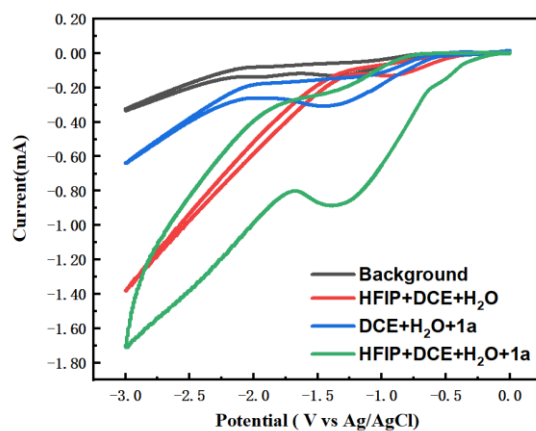

**Figure S16.** Cyclic voltammograms of HFIP, DCE, H<sub>2</sub>O and **1a**

## 9. Synthetic applications

### Conversions of **1b** to Compounds **40–46**, **40-*d*<sub>2</sub>**, and **41-*d*<sub>2</sub>**

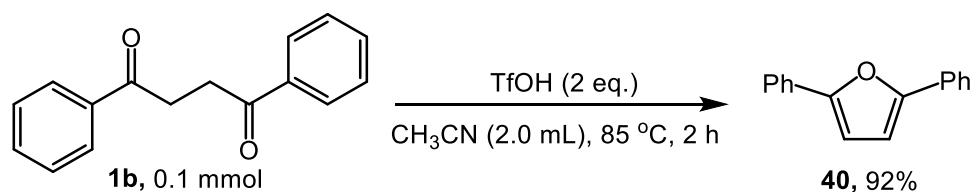

**2,5-diphenylfuran (40).**<sup>14</sup> To a dry schlenk tube that charged with nitrogen, 1,4-diketone **1b** (0.1 mmol, 24 mg) was added, then freshly distilled CH<sub>3</sub>CN (2.0 mL) was injected through a syringe. Subsequently, TfOH (17.3 μL, 0.2 mmol, 30 mg) was added to the mixture, and the resulting solution was stirred at 85 °C for 2 h. Then the resulting solution was cooled to room temperature, and solvent was evaporated under vacuum, the residue was purified by flash column chromatography on silica gel (eluent: PE/ EA= 100:1) to give the furan **40** as a yellow solid (20.3 mg, 92% yield). <sup>1</sup>H NMR (500 MHz, CDCl<sub>3</sub>) δ 7.77 (d, *J* = 7.4 Hz, 4H), 7.42 (t, *J* = 7.8 Hz, 4H), 7.29 (t, *J* = 7.3 Hz, 2H), 6.75 (s, 2H). <sup>13</sup>C NMR (125 MHz, CDCl<sub>3</sub>) δ 153.4, 130.8, 128.7, 127.4, 123.7, 107.2.

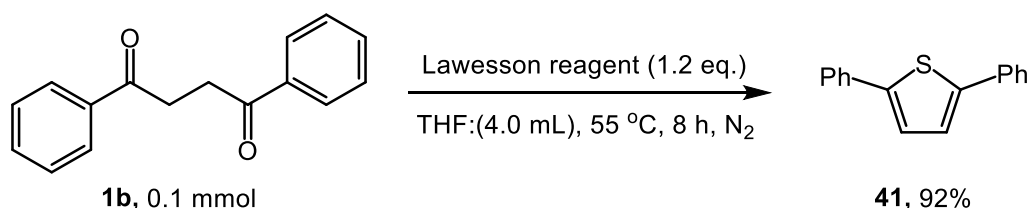

**2,5-diphenylthiophene (41).**<sup>14</sup> A schlenk tube was charged under N<sub>2</sub> atmosphere with 1,4-diketones **1b** (0.1 mmol, 24 mg), Lawesson's reagent (0.12 mmol, 49 mg), THF (4 mL), and heated to 55 °C. After 8 h, when the reaction was completed as determined by TLC, 2 g alumina was added and the THF was evaporated. The resulting solid was placed on a short column packed with silica which was eluted with acetonitrile to give **41** as a white solid (21.7 mg, 92% yield). <sup>1</sup>H NMR (500 MHz, CDCl<sub>3</sub>) δ 7.64 (d, *J* = 7.6 Hz, 4H), 7.40 (t, *J* = 7.7 Hz, 4H), 7.31 – 7.28 (m, 4H). <sup>13</sup>C NMR (125 MHz, CDCl<sub>3</sub>) δ 143.6, 134.3, 128.9, 127.5, 125.6, 124.0.

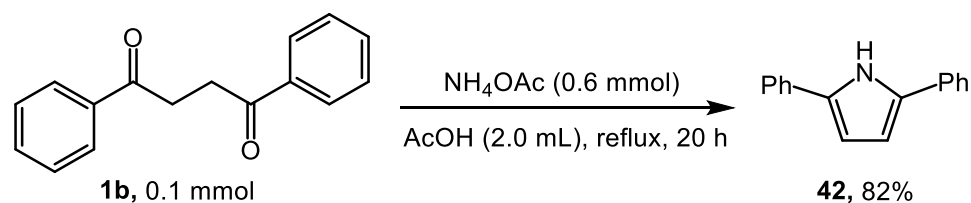

**2,5-diphenyl-1H-pyrrole (42).**<sup>14</sup> A mixture of 1,4-diketone **1b** (0.1 mmol, 24 mg), ammonium acetate (0.6 mmol, 47 mg), and acetic acid (2 mL) was heated to reflux for 20 h. After cooling, the reaction mixture was poured into ice-water. The formed solid was collected and washed with H<sub>2</sub>O and dried to give pure product **42** as a white solid (18.0 mg, 82% yield). <sup>1</sup>H NMR (500 MHz,

CDCl<sub>3</sub>)  $\delta$  8.55 (s, 1H), 7.51 (d,  $J$  = 7.7 Hz, 4H), 7.37 (t,  $J$  = 7.7 Hz, 4H), 7.21 (t,  $J$  = 7.2 Hz, 2H), 6.57 (d,  $J$  = 2.6 Hz, 2H). <sup>13</sup>C NMR (125 MHz, CDCl<sub>3</sub>)  $\delta$  133.2, 132.5, 129.0, 126.4, 123.8, 108.0.

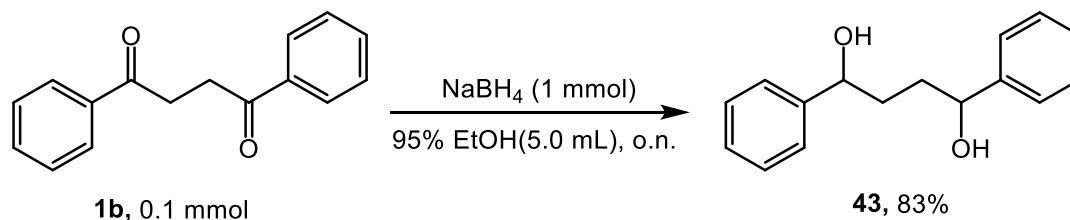

**1,4-diphenylbutane-1,4-diol (43).**<sup>16</sup> 1,4-diketone **1b** (0.1 mmol, 24 mg) was added to a flask containing ethanol (95%) in an ice bath at 0 °C. NaBH<sub>4</sub> (1 mmol, 38 mg) was added and the mixture was kept stirring at 0 °C for 1 h. After that time, the ice bath was removed and the mixture was stirred at room temperature overnight. Water (40 mL) and aqueous HCl (2 M) were added to the mixture until pH 7 was reached. The resulting aqueous phase was washed with ethyl acetate (3 x 20 mL) and the combined organic phases were dried over MgSO<sub>4</sub> and filtered off. The organic solvent was removed under vacuum and the residue was purified by column chromatography using petroleum ether and ethyl acetate (9:1 v/v) as eluent. (20.1 mg, 83% yield). <sup>1</sup>H NMR (500 MHz, CDCl<sub>3</sub>)  $\delta$  7.25 – 7.19 (m, 10H), 4.57 (d,  $J$  = 4.8 Hz, 1H), 4.53 (d,  $J$  = 7.7 Hz, 1H), 3.65 (s, 1H), 3.42 (s, 1H), 1.82 – 1.68 (m, 4H). <sup>13</sup>C NMR (125 MHz, CDCl<sub>3</sub>)  $\delta$  144.7, 144.6, 128.4, 128.4, 127.4, 127.4, 125.9, 74.4, 74.0, 36.0, 35.0.

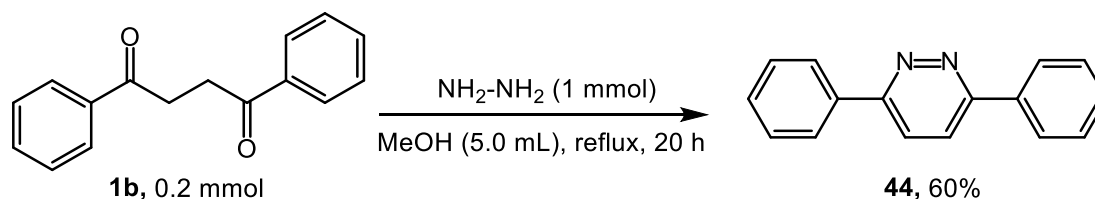

**3,6-diphenylpyridazine (44).**<sup>17</sup> A hot methanolic solution of 1,4-diketone **1b** (24mg, 0.1 mmol) was dropped in excess hydrazine hydrate (12.5 mg, 0.25 mmol) and the mixture was refluxed at 70 °C in oil bath for 12 hours. After being cooled to room temperature, the mixture was filtered and the residue was washed with methanol to give the desired **44**. (27.9 mg, 60% yield). <sup>1</sup>H NMR (500 MHz, CDCl<sub>3</sub>)  $\delta$  8.16 (d,  $J$  = 7.2 Hz, 4H), 7.93 (s, 2H), 7.56 – 7.49 (m, 6H). <sup>13</sup>C NMR (125 MHz, CDCl<sub>3</sub>)  $\delta$  157.7, 136.2, 130.0, 129.0, 127.0, 124.2.

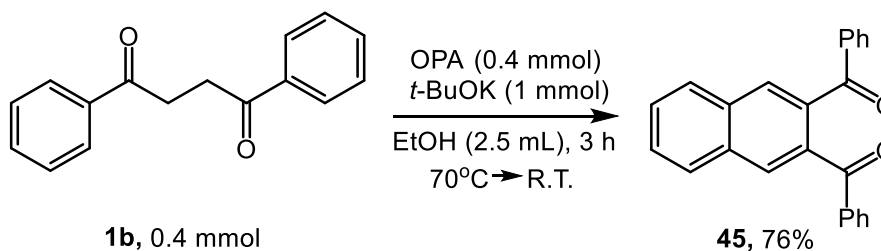

**Naphthalene-2,3-diylbis(phenylmethanone) (45).**<sup>15</sup> The 1,4-diketone **1b** (0.4 mmol, 95.2 mg)

and phthalaldehyde (0.4 mmol, 53.7 mg) were dissolved in hot ethanol (5 mL). To this, *t*-BuOK (1 mmol, 1.122 mg) was slowly added and the reaction mixture was stirred for 3 h at room temperature. The solid obtained was filtered and washed with methanol to afford **45** (102.3 mg, 76%) as a colorless solid.  $^1\text{H NMR}$  (500 MHz,  $\text{CDCl}_3$ )  $\delta$  8.10 (s, 2H), 7.92 (dd,  $J = 6.2, 3.3$  Hz, 2H), 7.84 – 7.82 (m, 4H), 7.64 (dd,  $J = 6.2, 3.3$  Hz, 2H), 7.53 (t,  $J = 7.3$  Hz, 2H), 7.41 (t,  $J = 7.3$  Hz, 4H).  $^{13}\text{C NMR}$  (125 MHz,  $\text{CDCl}_3$ )  $\delta$  196.4, 137.4, 137.0, 133.0, 133.0, 130.9, 130.0, 128.8, 128.8, 128.4.

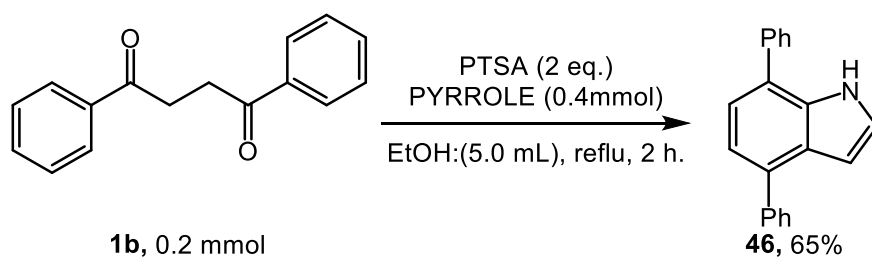

**4,7-diphenyl-1H-indole (46).**<sup>18</sup> Add 1,4-diketone **1b** (0.2 mmol, 48 mg), *p*-toluenesulfonic acid (0.4 mmol, 47 mg), and pyrrole (0.4 mmol, 47 mg) to ethanol (5 mL), heat and reflux for 2 hours. Then the resulting solution was cooled to room temperature, and solvent was evaporated under vacuum, the residue was purified by flash column chromatography on silica gel (eluent: PE/ EA = 15:1) to give **46**. (35.0 mg, 65% yield).  $^1\text{H NMR}$  (500 MHz,  $\text{CDCl}_3$ )  $\delta$  8.47 (s, 1H), 7.73 (d,  $J = 7.3$  Hz, 2H), 7.65 (d,  $J = 7.5$  Hz, 2H), 7.49 (dt,  $J = 12.2, 7.6$  Hz, 4H), 7.38 (dd,  $J = 13.3, 7.4$  Hz, 2H), 7.28 (d,  $J = 2.5$  Hz, 2H), 7.21 (dd,  $J = 5.6, 2.8$  Hz, 1H), 6.78 – 6.77 (m, 1H).  $^{13}\text{C NMR}$  (125 MHz,  $\text{CDCl}_3$ )  $\delta$  140.3, 138.2, 133.2, 133.0, 128.4, 127.9, 127.7, 127.4, 126.6, 126.1, 125.6, 123.9, 123.8, 121.5, 119.5, 101.8.

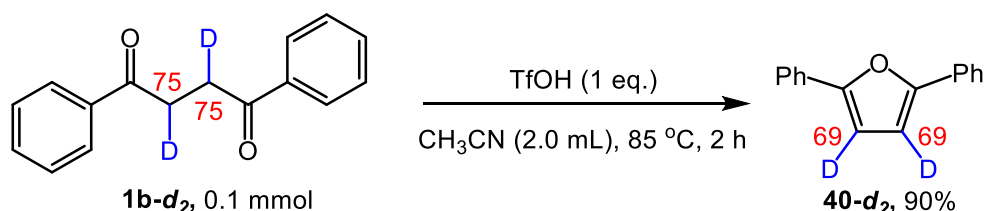

**2,5-diphenylfuran-3,4-d<sub>2</sub> (40-d<sub>2</sub>).**<sup>14</sup> To a dry schlenk tube that charged with nitrogen, 1,4-diphenylbutane-1,4-dione-2,3-d<sub>2</sub> **1b-d<sub>2</sub>** (0.1 mmol, 24 mg) was added, then freshly distilled  $\text{CH}_3\text{CN}$  (2.0 mL) was injected through a syringe. Subsequently, TfOH (17.3  $\mu\text{L}$ , 0.2 mmol, 30 mg) was added to the mixture, and the resulting solution was stirred at 85  $^\circ\text{C}$  for 2 h. Then the resulting solution was cooled to room temperature, and solvent was evaporated under vacuum, the residue was purified by flash column chromatography on silica gel (eluent: PE/ EA = 100:1) to give the furan **40-d<sub>2</sub>** as a yellow solid (20.0 mg, 90% yield).  $^1\text{H NMR}$  (500 MHz,  $\text{CDCl}_3$ )  $\delta$  7.74 (d,  $J = 7.6$  Hz, 4H), 7.40 (t,  $J = 7.3$  Hz, 4H), 7.26 (t,  $J = 7.3$  Hz, 2H), 6.73 (s, 1H).

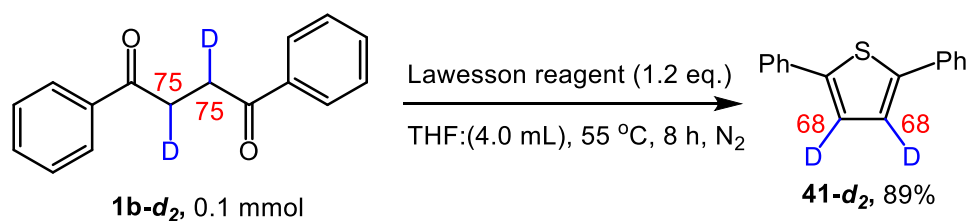

**2,5-diphenylthiophene-3,4-d<sub>2</sub> (41-d<sub>2</sub>).**<sup>14</sup> A schlenk tube was charged under N<sub>2</sub> atmosphere with 1,4-diphenylbutane-1,4-dione-2,3-d<sub>2</sub> **1b-d<sub>2</sub>** (0.1 mmol, 24 mg), Lawesson's reagent (0.12 mmol, 49 mg), THF (4 mL), and heated to 55°C. After 8 h, when the reaction was completed as determined by TLC, 2 g alumina was added and the THF was evaporated. The resulting solid was placed on a short column packed with silica which was eluted with acetonitrile to give **41-d<sub>2</sub>** as a white solid (21.2 mg, 89% yield). <sup>1</sup>H NMR (500 MHz, CDCl<sub>3</sub>) δ 7.66 (d, *J* = 7.6 Hz, 4H), 7.41 (t, *J* = 7.7 Hz, 4H), 7.31 (t, *J* = 3.8 Hz, 3H).

## 10. Proposed reaction mechanism

### 1) pH:

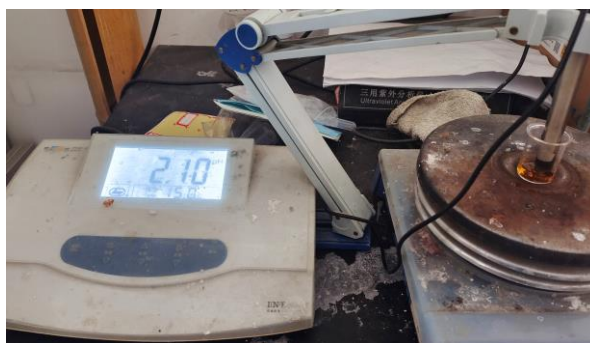

**Figure S17.** pH in the decagram-scale reaction water

The water phase is separated after the completion of the decagram-scale reaction, and the measured pH value is 2.10, which is acidic.

### 2) Control experiments



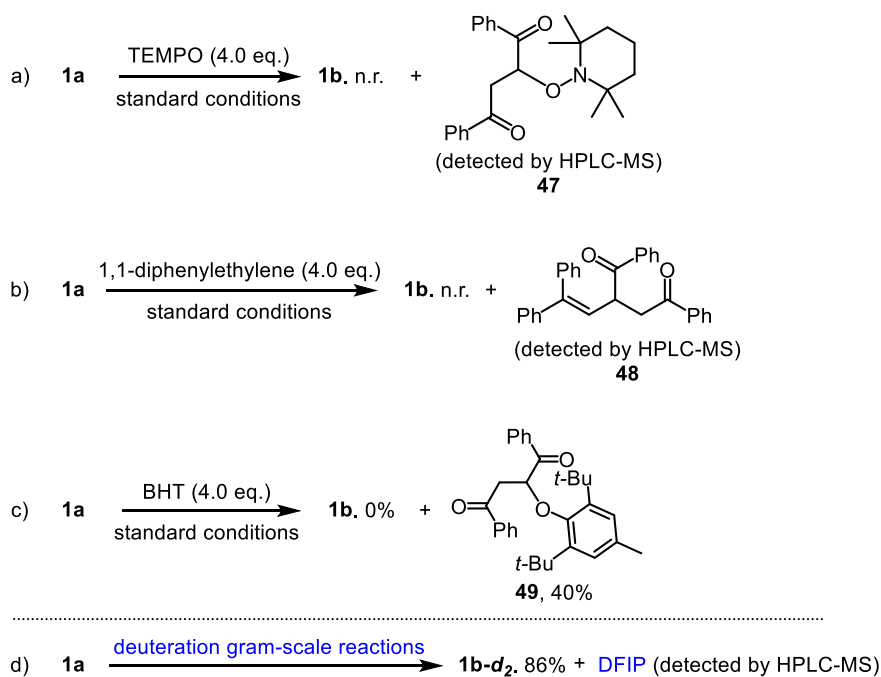

**Scheme S2.** Control experiments

a) To the mixed solution of DCE (4.5 mL), HFIP (0.5 mL) and H<sub>2</sub>O (0.1 mL), 1,4-enedione **1a** (0.1 mmol, 1.0 eq.), TEMPO (0.4 mmol, 4.0 eq.) and *n*-Bu<sub>4</sub>NClO<sub>4</sub> (0.2 mmol, 2.0 eq.) were added. Equipped with graphite felt (10 × 10 × 5 mm) as anode and graphite felt (10 × 10 × 5 mm) as cathode, non-separating electrolytic cell device. The reaction mixture was stirred at constant current of 5 mA at 20 °C in Air for 2 hours. After the reaction (monitored by TLC), the reaction system was dried with anhydrous MgSO<sub>4</sub>, filtered and concentrated under reduced pressure. The residue was purified by silica gel column chromatography and eluted with petroleum ether and ethyl acetate. The target product was not obtained, and free radical capture products **47** detected under HRMS.

**HRMS** (ESI-TOF, [M + H<sup>+</sup>]): calcd for C<sub>25</sub>H<sub>31</sub>NO<sub>3</sub> 394.2377, found 394.2382

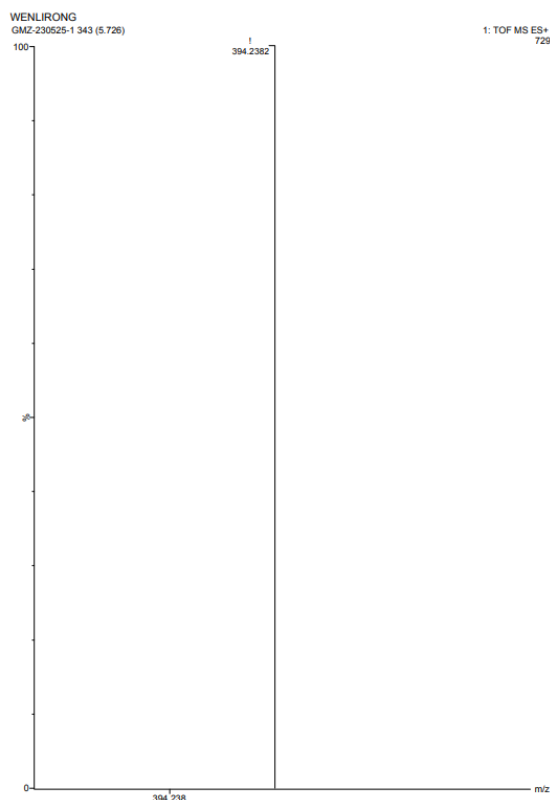

b) To the mixed solution of DCE (4.5 mL), HFIP (0.5 mL) and H<sub>2</sub>O (0.1 mL), 1,4-enedione **1a** (0.1 mmol, 1.0 eq.), 1,1-diphenylethylene (0.4 mmol, 4.0 eq.) and *n*-Bu<sub>4</sub>NClO<sub>4</sub> (0.2 mmol, 2.0 eq.) were added. Equipped with graphite felt (10 × 10 × 5 mm) as anode and graphite felt (10 × 10 × 5 mm) as cathode, non-separating electrolytic cell device. The reaction mixture was stirred at constant current of 5 mA at 20 °C in Air for 2 hours. After the reaction (monitored by TLC), the reaction system was dried with anhydrous MgSO<sub>4</sub>, filtered and concentrated under reduced pressure. The residue was purified by silica gel column chromatography and eluted with petroleum ether and ethyl acetate. The target product was not obtained, and free radical capture products **48** detected under HRMS.

**HRMS** (ESI-TOF, [M + H<sup>+</sup>]): calcd for C<sub>30</sub>H<sub>24</sub>O<sub>2</sub> 417.1849, found 417.1848

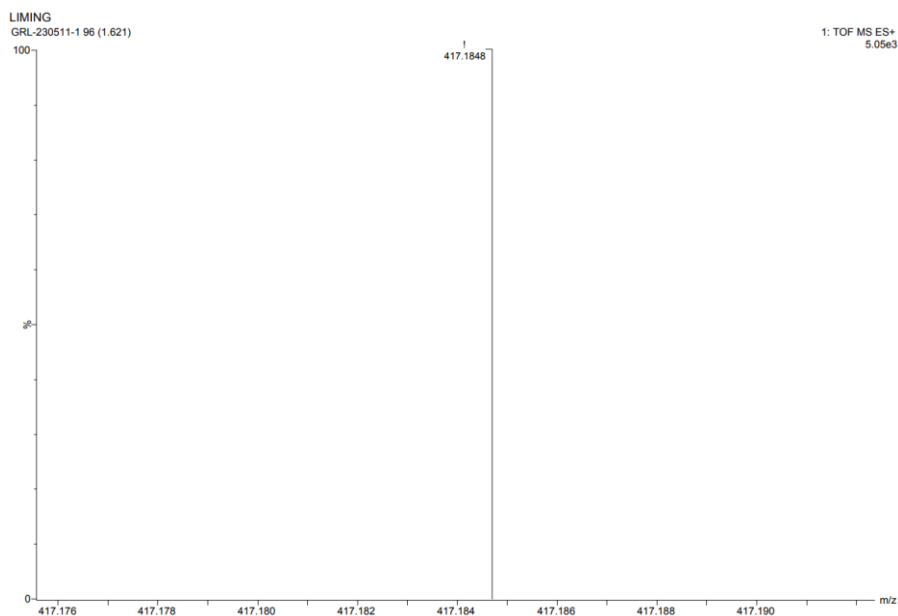

c) To the mixed solution of DCE (4.5 mL), HFIP (0.5 mL) and H<sub>2</sub>O (0.1 mL), 1,4-enedione **1a** (0.1 mmol, 1.0 eq.), BHT (0.4 mmol, 4.0 eq.) and *n*-Bu<sub>4</sub>NClO<sub>4</sub> (0.2 mmol, 2.0 eq.) were added. Equipped with graphite felt (10 × 10 × 5 mm) as anode and graphite felt (10 × 10 × 5 mm) as cathode, non-separating electrolytic cell device. The reaction mixture was stirred at constant current of 5 mA at 20 °C in Air for 2 hours. After the reaction (monitored by TLC), the reaction system was dried with anhydrous MgSO<sub>4</sub>, filtered and concentrated under reduced pressure. The residue was purified by silica gel column chromatography and eluted with petroleum ether and ethyl acetate. The target product was not obtained and free radical capture product **49** was obtained in 40% yield. <sup>1</sup>H NMR (500 MHz, CDCl<sub>3</sub>) δ 8.12 (d, *J* = 7.5 Hz, 2H), 7.83 (d, *J* = 7.1 Hz, 2H), 7.59 (t, *J* = 7.3 Hz, 1H), 7.54 – 7.50 (m, 3H), 7.42 (t, *J* = 7.7 Hz, 2H), 6.70 (d, *J* = 3.0 Hz, 1H), 6.48 (d, *J* = 3.0 Hz, 1H), 4.40 (dd, *J* = 10.0, 3.2 Hz, 1H), 3.55 (dd, *J* = 18.1, 9.9 Hz, 1H), 3.03 (dd, *J* = 18.1, 3.2 Hz, 1H), 1.20 (s, 9H), 1.18 (s, 9H), 1.16 (s, 3H).

**HRMS** (ESI-TOF, [M + Na<sup>+</sup>]): calcd for C<sub>31</sub>H<sub>36</sub>O<sub>3</sub> 479.2557, found 479.2560

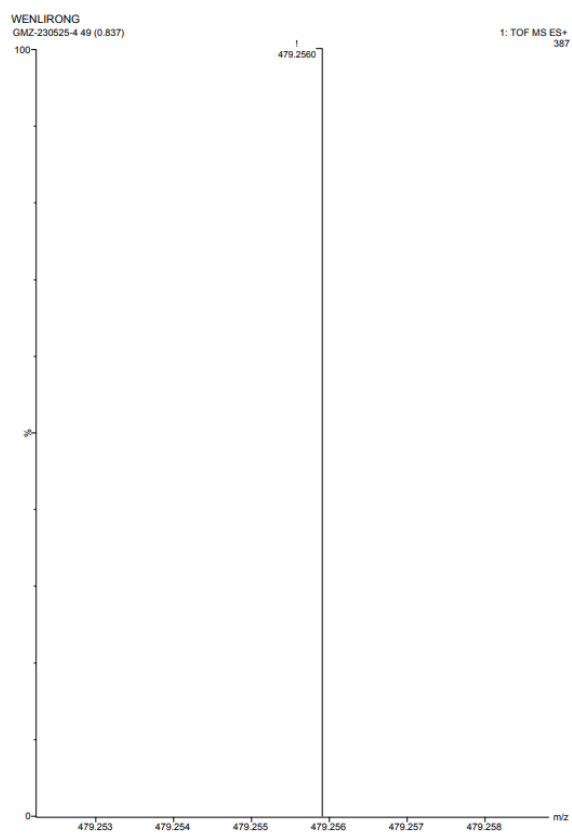

d) DFIP detection in the system

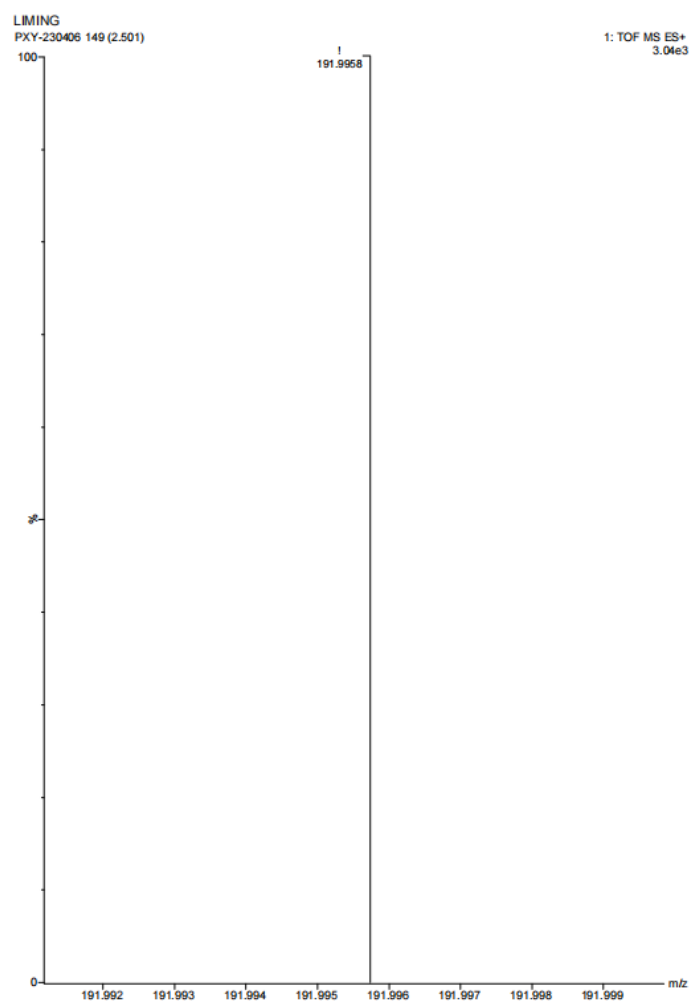

**Figure S18.** HRMS (ESI-TOF, [M + Na<sup>+</sup>]) of DFIP

the organic phase was separated in the deuterium gram-scale reaction and perform HRMS testing to obtain [M + Na<sup>+</sup>] data for DFIP.

**HRMS** (ESI-TOF, [M + Na<sup>+</sup>]): calcd for C<sub>3</sub>HDF<sub>6</sub>O, 191.9965, found 191.9958

## 11. Unsuccessful substrates

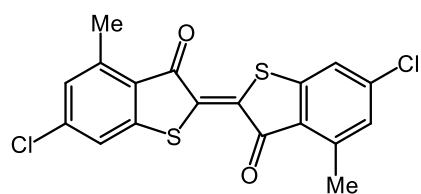

n.r.

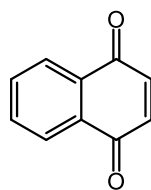

n.r.

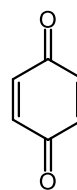

n.r.

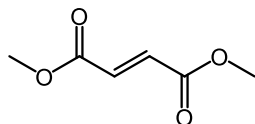

Trace

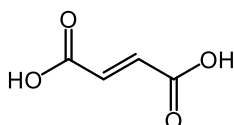

Trace

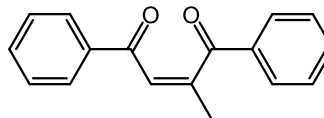

Trace

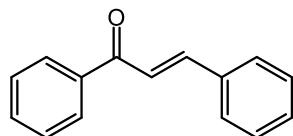

mass

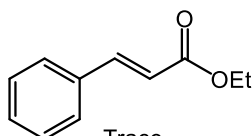

Trace

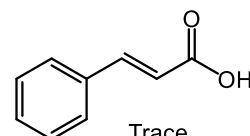

Trace

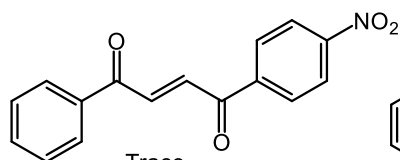

Trace

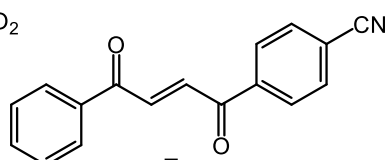

Trace

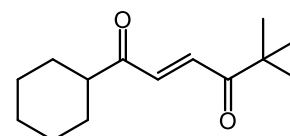

Trace

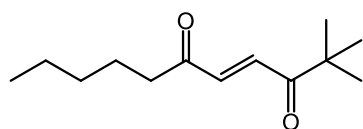

Trace

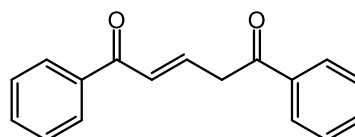

Trace

## 12. NMR spectra for the obtained compound

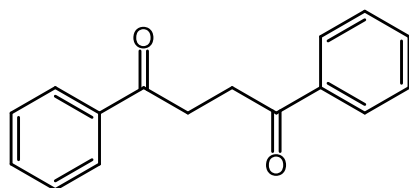

**1b**

22.9 mg, 96% yield. The spectra matched with the previous report.<sup>1</sup>

**<sup>1</sup>H NMR** (500 MHz, CDCl<sub>3</sub>) δ 8.04 (d, *J* = 7.2 Hz, 4H), 7.58 (t, *J* = 7.0 Hz, 2H), 7.48 (t, *J* = 6.8 Hz, 4H), 3.47 (s, 4H).

**<sup>13</sup>C NMR** (125 MHz, CDCl<sub>3</sub>) δ 198.8, 136.9, 133.3, 128.7, 128.3, 32.7.

**HRMS** (ESI-TOF, [M + H<sup>+</sup>]): calcd for C<sub>16</sub>H<sub>14</sub>O<sub>2</sub> 239.1067, found 239.1070

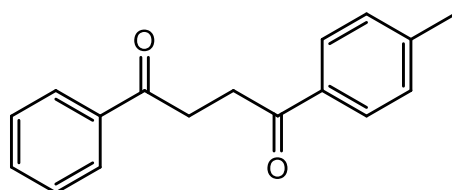

**2b**

24.0 mg, 95% yield. The spectra matched with the previous report.<sup>2</sup>

**<sup>1</sup>H NMR** (500 MHz, CDCl<sub>3</sub>) δ 8.04 (d, *J* = 7.6 Hz, 2H), 7.94 (d, *J* = 8.0 Hz, 2H), 7.57 (t, *J* = 7.3 Hz, 1H), 7.48 (t, *J* = 7.7 Hz, 2H), 7.27 (d, *J* = 8.2 Hz, 2H), 3.44 (d, *J* = 2.2 Hz, 4H), 2.42 (s, 3H).

**<sup>13</sup>C NMR** (125 MHz, CDCl<sub>3</sub>) δ 198.8, 198.3, 143.9, 136.8, 134.3, 133.1, 129.3, 128.6, 128.2, 128.1, 32.6, 32.5, 21.6.

**HRMS** (ESI-TOF, [M + H<sup>+</sup>]): calcd for C<sub>17</sub>H<sub>16</sub>O<sub>2</sub> 253.1223, found 253.1227

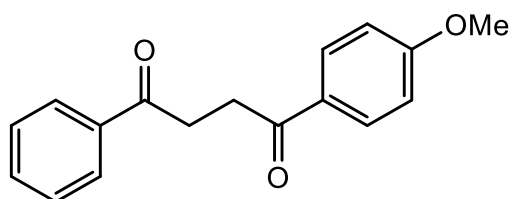

**3b**

20.9 mg, 78% yield. The spectra matched with the previous report.<sup>2</sup>

**<sup>1</sup>H NMR** (500 MHz, CDCl<sub>3</sub>) δ 8.03 (t, *J* = 8.6 Hz, 4H), 7.57 (t, *J* = 7.3 Hz, 1H), 7.47 (t, *J* = 7.6 Hz, 2H), 6.95 (d, *J* = 8.6 Hz, 2H), 3.87 (s, 3H), 3.52 – 3.16 (m, 4H).

**<sup>13</sup>C NMR** (125 MHz, CDCl<sub>3</sub>) δ 198.9, 197.2, 163.5, 136.8, 133.1, 130.4, 129.9, 128.6, 128.1, 113.7, 55.5, 32.7, 32.2.

**HRMS** (ESI-TOF, [M + H<sup>+</sup>]): calcd for C<sub>17</sub>H<sub>16</sub>O<sub>3</sub> 269.1172, found 269.1172

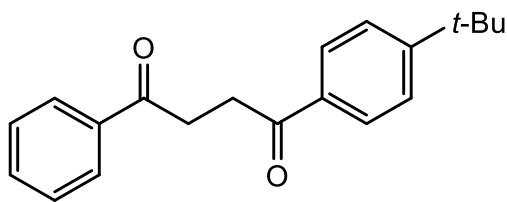

**4b**

28.3 mg, 96% yield. The spectra matched with the previous report.<sup>9</sup>

**<sup>1</sup>H NMR** (500 MHz, CDCl<sub>3</sub>) δ 8.04 (d, *J* = 7.7 Hz, 2H), 7.99 (d, *J* = 8.4 Hz, 2H), 7.57 (t, *J* = 7.3 Hz, 1H), 7.50 – 7.48 (m, 4H), 3.46 (s, 4H), 1.35 (s, 9H).

**<sup>13</sup>C NMR** (125 MHz, CDCl<sub>3</sub>) δ 198.8, 198.4, 156.9, 136.8, 134.2, 133.1, 128.6, 128.1, 128.1, 125.5, 35.1, 32.7, 32.5, 31.1.

**HRMS** (ESI-TOF, [M + Na<sup>+</sup>]): calcd for C<sub>20</sub>H<sub>22</sub>O<sub>2</sub> 317.1512, found 317.1514

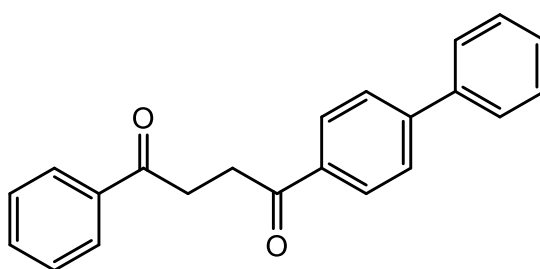

**5b**

23.6 mg, 75% yield. The spectra matched with the previous report.<sup>10</sup>

**<sup>1</sup>H NMR** (500 MHz, CDCl<sub>3</sub>) δ 8.15 (d, *J* = 8.2 Hz, 2H), 8.09 (d, *J* = 7.5 Hz, 2H), 7.74 (d, *J* = 8.1 Hz, 2H), 7.68 (d, *J* = 7.6 Hz, 2H), 7.62 (t, *J* = 7.4 Hz, 1H), 7.52 (q, *J* = 7.4 Hz, 4H), 7.44 (t, *J* = 7.3 Hz, 1H), 3.53 (s, 4H).

**<sup>13</sup>C NMR** (125 MHz, CDCl<sub>3</sub>) δ 198.7, 198.3, 145.8, 139.9, 136.8, 135.5, 133.2, 129.0, 128.7, 128.6, 128.2, 128.1, 127.3, 127.3, 32.7, 32.6.

**HRMS** (ESI-TOF, [M + Na<sup>+</sup>]): calcd for C<sub>22</sub>H<sub>18</sub>O<sub>2</sub> 337.1199, found 337.1198

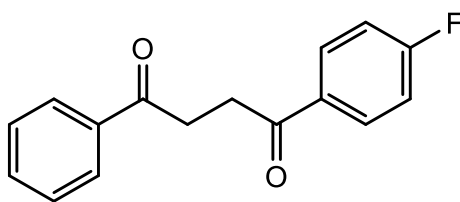

**6b**

21.5 mg, 84 % yield. The spectra matched with the previous report.<sup>5</sup>

**<sup>1</sup>H NMR** (500 MHz, CDCl<sub>3</sub>) δ 8.10 – 8.01 (m, 4H), 7.58 (t, *J* = 7.1 Hz, 1H), 7.48 (t, *J* = 7.6 Hz, 2H), 7.15 (t, *J* = 8.5 Hz, 2H), 3.44 (dd, *J* = 14.7, 6.2 Hz, 4H).

**<sup>13</sup>C NMR** (125 MHz, CDCl<sub>3</sub>) δ 198.6, 197.1, 165.8 (d, *J* = 254.6 Hz), 136.7, 133.2 (d, *J* = 7.8 Hz), 133.2, 130.8 (d, *J* = 9.4 Hz), 128.6, 128.1, 115.7 (d, *J* = 22.0 Hz), 32.6, 32.4.

**<sup>19</sup>F NMR** (376 MHz, CDCl<sub>3</sub>) δ -105.24.

**HRMS** (ESI-TOF, [M + H<sup>+</sup>]): calcd for C<sub>16</sub>H<sub>13</sub>FO<sub>2</sub> 257.0972, found 257.0974



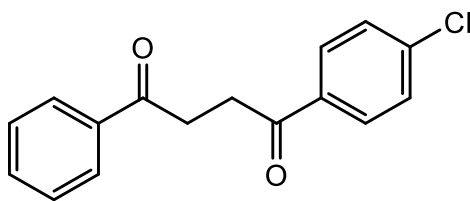

**7b**

26.2 mg, 96% yield. The spectra matched with the previous report.<sup>5</sup>

**<sup>1</sup>H NMR** (500 MHz, CDCl<sub>3</sub>) δ 8.03 (d, *J* = 7.7 Hz, 2H), 7.97 (d, *J* = 7.6 Hz, 2H), 7.57 (d, *J* = 7.2 Hz, 1H), 7.51 – 7.42 (m, 4H), 3.45 (d, *J* = 4.3 Hz, 2H), 3.42 (d, *J* = 5.8 Hz, 2H).

**<sup>13</sup>C NMR** (125 MHz, CDCl<sub>3</sub>) δ 198.5, 197.5, 139.6, 136.7, 135.1, 133.2, 129.6, 128.9, 128.6, 128.1, 32.6, 32.5.

**HRMS** (ESI-TOF, [M + H<sup>+</sup>]): calcd for C<sub>16</sub>H<sub>13</sub>ClO<sub>2</sub> 273.0677, found 273.0675

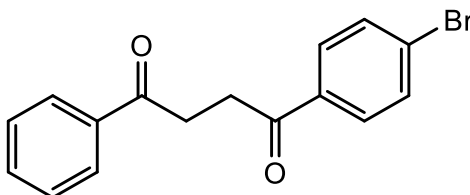

**8b**

29.8 mg, 94% yield. The spectra matched with the previous report.<sup>7</sup>

**<sup>1</sup>H NMR** (500 MHz, CDCl<sub>3</sub>) δ 8.03 (d, *J* = 7.7 Hz, 2H), 7.90 (d, *J* = 8.1 Hz, 2H), 7.62 (d, *J* = 8.6 Hz, 2H), 7.58 (t, *J* = 7.6 Hz, 1H), 7.48 (t, *J* = 7.6 Hz, 2H), 3.45 (d, *J* = 5.9 Hz, 2H), 3.41 (d, *J* = 5.5 Hz, 2H).

**<sup>13</sup>C NMR** (125 MHz, CDCl<sub>3</sub>) δ 198.5, 197.7, 136.7, 135.5, 133.2, 131.9, 129.7, 128.6, 128.3, 128.1, 32.5, 32.5.

**HRMS** (ESI-TOF, [M + H<sup>+</sup>]): calcd for C<sub>16</sub>H<sub>13</sub>BrO<sub>2</sub> 317.0172, found 317.0172

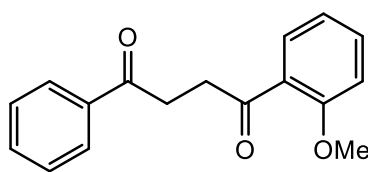

**9b**

23.6 mg, 88 % yield.

**<sup>1</sup>H NMR** (500 MHz, CDCl<sub>3</sub>) δ 8.03 (d, *J* = 7.6 Hz, 2H), 7.77 (d, *J* = 7.5 Hz, 1H), 7.56 (t, *J* = 7.4 Hz, 1H), 7.47 (t, *J* = 7.6 Hz, 3H), 7.04 – 6.95 (m, 2H), 3.92 (s, 3H), 3.46 (d, *J* = 6.0 Hz, 2H), 3.42 (d, *J* = 6.0 Hz, 2H).

**<sup>13</sup>C NMR** (125MHz, CDCl<sub>3</sub>) δ 200.6, 199.1, 158.8, 137.0, 133.6, 133.0, 130.5, 128.6, 128.1, 127.9, 120.7, 111.6, 55.5, 38.0, 33.0.

**HRMS** (ESI-TOF, [M + H<sup>+</sup>]): calcd for C<sub>17</sub>H<sub>16</sub>O<sub>3</sub> 269.1172, found 269.1178

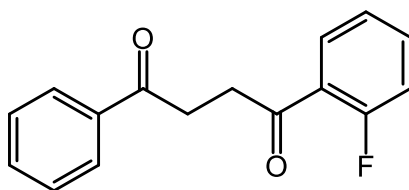

**10b**

22.0 mg, 86% yield. The spectra matched with the previous report.<sup>7</sup>

**<sup>1</sup>H NMR** (500 MHz, CDCl<sub>3</sub>) δ 8.16 – 7.97 (m, 2H), 7.90 (td, *J* = 7.6, 1.9 Hz, 1H), 7.61 – 7.48 (m, 4H), 7.26 – 7.19 (m, 1H), 7.19 – 7.09 (m, 1H), 3.45 (d, *J* = 2.0 Hz, 4H).

**<sup>13</sup>C NMR** (125 MHz, CDCl<sub>3</sub>) δ 198.6, 197.1 (d, *J* = 4.0 Hz), 162.1 (d, *J* = 254.8 Hz), 136.9, 134.7 (d, *J* = 9.0 Hz), 133.2, 130.8 (d, *J* = 2.6 Hz), 128.7, 128.2, 125.6, 125.5, 124.5 (d, *J* = 3.4 Hz), 116.7 (d, *J* = 23.9 Hz), 37.5, 37.5, 32.7 (d, *J* = 2.2 Hz).

**<sup>19</sup>F NMR** (376 MHz, CDCl<sub>3</sub>) δ -108.96.

**HRMS** (ESI-TOF, [M + H<sup>+</sup>]): calcd for C<sub>16</sub>H<sub>13</sub>FO<sub>2</sub> 257.0972, found 257.0976

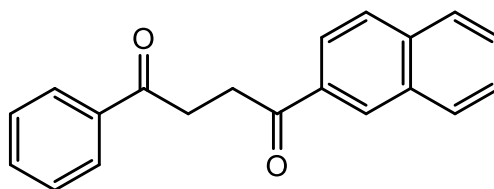

**11b**

19.3 mg, 67% yield. The spectra matched with the previous report.<sup>5</sup>

**<sup>1</sup>H NMR** (500 MHz, CDCl<sub>3</sub>) δ 8.59 (s, 1H), 8.08 (t, *J* = 9.3 Hz, 3H), 7.99 (d, *J* = 8.0 Hz, 1H), 7.93 – 7.85 (m, 2H), 7.63 – 7.53 (m, 3H), 7.49 (t, *J* = 7.6 Hz, 2H), 3.61 (t, *J* = 6.3 Hz, 2H), 3.52 (t, *J* = 6.4 Hz, 2H).

**<sup>13</sup>C NMR** (125 MHz, CDCl<sub>3</sub>) δ 198.8, 198.6, 136.8, 135.7, 134.1, 133.2, 132.6, 129.9, 129.6, 128.6, 128.5, 128.2, 127.8, 126.8, 123.9, 32.7, 32.7.

**HRMS** (ESI-TOF, [M + H<sup>+</sup>]): calcd for C<sub>20</sub>H<sub>16</sub>O<sub>2</sub> 289.1223, found 289.1224

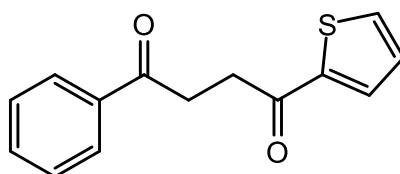

**12b**

13.2 mg, 54% yield. The spectra matched with the previous report.<sup>5</sup>

**<sup>1</sup>H NMR** (500 MHz, CDCl<sub>3</sub>) δ 8.02 (d, *J* = 7.7 Hz, 2H), 7.83 (d, *J* = 3.8 Hz, 1H), 7.64 (d, *J* = 5.0 Hz, 1H), 7.57 (t, *J* = 7.4 Hz, 1H), 7.47 (t, *J* = 7.6 Hz, 2H), 7.15 (t, *J* = 4.4 Hz, 1H), 3.45 (d, *J* = 5.9 Hz, 2H), 3.41 (d, *J* = 5.8 Hz, 2H).

**<sup>13</sup>C NMR** (125 MHz, CDCl<sub>3</sub>) δ 198.6, 191.7, 144.1, 136.8, 133.7, 133.3, 132.2, 128.8, 128.3, 33.3, 32.8.

**HRMS** (ESI-TOF, [M + H<sup>+</sup>]): calcd for C<sub>14</sub>H<sub>12</sub>O<sub>2</sub>S 245.0631, found 245.0631

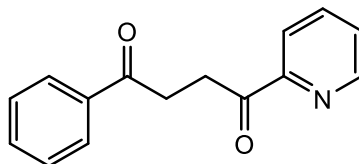

**13b**

15.3 mg, 64% yield.

**<sup>1</sup>H NMR** (500 MHz, CDCl<sub>3</sub>) δ 8.71 (d, *J* = 4.7 Hz, 1H), 8.04 (t, *J* = 6.7 Hz, 3H), 7.83 (t, *J* = 7.5 Hz, 1H), 7.57 (t, *J* = 7.4 Hz, 1H), 7.47 (t, *J* = 7.7 Hz, 3H), 3.69 (t, *J* = 6.3 Hz, 2H), 3.47 (t, *J* = 6.3 Hz, 2H).

**<sup>13</sup>C NMR** (125 MHz, CDCl<sub>3</sub>) δ 198.5, 196.6, 151.3, 147.0, 134.9, 134.8, 131.0, 126.5, 126.1, 125.1, 119.8, 30.7, 30.0.

**HRMS** (ESI-TOF, [M + H<sup>+</sup>]): calcd for C<sub>15</sub>H<sub>13</sub>NO<sub>2</sub> 240.1019, found 240.1019

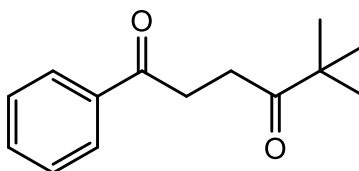

**14b**

18.8 mg, 86% yield. The spectra matched with the previous report.<sup>7</sup>

**<sup>1</sup>H NMR** (500 MHz, CDCl<sub>3</sub>) δ 7.98 (d, *J* = 7.0 Hz, 2H), 7.54 (t, *J* = 7.3 Hz, 1H), 7.45 (t, *J* = 7.7 Hz, 2H), 3.24 (t, *J* = 6.3 Hz, 2H), 2.96 (t, *J* = 6.3 Hz, 2H), 1.21 (s, 9H).

**<sup>13</sup>C NMR** (125 MHz, CDCl<sub>3</sub>) δ 214.7, 199.0, 136.9, 133.1, 128.6, 128.1, 44.1, 32.4, 30.8, 26.6.

**HRMS** (ESI-TOF, [M + H<sup>+</sup>]): calcd for C<sub>14</sub>H<sub>18</sub>O<sub>2</sub> 219.1380, found 219.1383

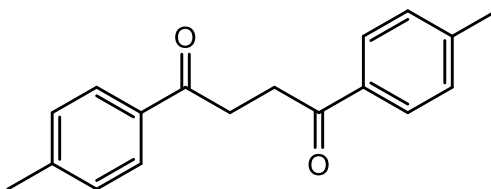

**15b**

20.8 mg, 78 % yield. The spectra matched with the previous report.<sup>4</sup>

**<sup>1</sup>H NMR** (500 MHz, CDCl<sub>3</sub>) δ 7.97 (d, *J* = 8.0 Hz, 4H), 7.30 (d, *J* = 8.1 Hz, 4H), 3.46 (s, 4H), 2.45 (s, 6 H).

**<sup>13</sup>C NMR** (125 MHz, CDCl<sub>3</sub>) δ 198.5, 143.9, 134.3, 129.3, 128.3, 32.5, 21.7.

**HRMS** (ESI-TOF, [M + H<sup>+</sup>]): calcd for C<sub>18</sub>H<sub>18</sub>O<sub>2</sub> 267.1380, found 267.1380

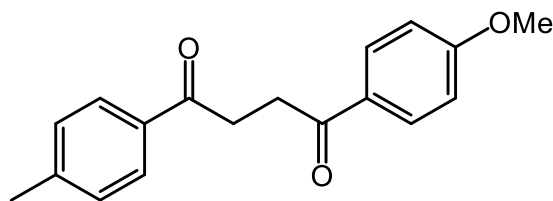

**16b**

22.0 mg, 78% yield. The spectra matched with the previous report.<sup>4</sup>

**<sup>1</sup>H NMR** (500 MHz, CDCl<sub>3</sub>) δ 8.02 (d, *J* = 8.7 Hz, 2H), 7.94 (d, *J* = 8.1 Hz, 2H), 7.27 (d, *J* = 8.0 Hz, 2H), 6.97 – 6.92 (m, 2H), 3.87 (s, 3H), 3.46 – 3.37 (m, 4H), 2.41 (s, 3H).

**<sup>13</sup>C NMR** (125 MHz, CDCl<sub>3</sub>) δ 198.5, 197.3, 163.5, 143.9, 134.4, 130.4, 130.0, 129.3, 128.2, 113.7, 55.5, 32.6, 32.3, 21.6.

**HRMS** (ESI-TOF, [M + H<sup>+</sup>]): calcd for C<sub>18</sub>H<sub>18</sub>O<sub>3</sub> 283.1329, found 283.1331

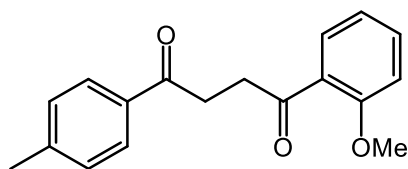

**17b**

22.0 mg, 78% yield.

**<sup>1</sup>H NMR** (500 MHz, CDCl<sub>3</sub>) δ 7.93 (d, *J* = 8.4 Hz, 2H), 7.79 – 7.74 (m, 1H), 7.49 – 7.43 (m, 1H), 7.29 – 7.24 (m, 2H), 7.04 – 6.95 (m, 2H), 3.92 (s, 3H), 3.44 (d, *J* = 6.2 Hz, 2H), 3.39 (d, *J* = 5.8 Hz, 2H), 2.41 (s, 3H).

**<sup>13</sup>C NMR** (125 MHz, CDCl<sub>3</sub>) δ 200.8, 198.7, 158.8, 143.7, 134.5, 133.5, 130.5, 129.2, 128.2, 128.0, 120.6, 111.6, 55.5, 38.0, 32.9, 21.6.

**HRMS** (ESI-TOF, [M + H<sup>+</sup>]): calcd for C<sub>18</sub>H<sub>18</sub>O<sub>3</sub> 283.1329, found 283.1327

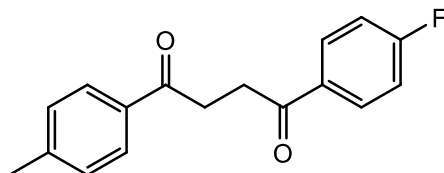

**18b**

19.2 mg, 71% yield.

**<sup>1</sup>H NMR** (500 MHz, CDCl<sub>3</sub>) δ 8.13 – 8.06 (m, 2H), 7.96 (d, *J* = 8.0 Hz, 2H), 7.30 (d, *J* = 8.0 Hz, 2H), 7.17 (t, *J* = 8.6 Hz, 2H), 3.46 – 3.44 (m, 4H), 2.44 (s, 3H).

**<sup>13</sup>C NMR** (125 MHz, CDCl<sub>3</sub>) δ 196.2, 195.2, 163.8 (d, *J* = 254.5 Hz), 142.0, 132.3, 131.3 (d, *J* = 3.1 Hz), 128.7 (d, *J* = 9.4 Hz), 127.3, 126.2, 113.6 (d, *J* = 21.9 Hz), 30.5, 19.6.

**<sup>19</sup>F NMR** (376 MHz, CDCl<sub>3</sub>) δ -105.33.

**HRMS** (ESI-TOF, [M + H<sup>+</sup>]): calcd for C<sub>17</sub>H<sub>15</sub>FO<sub>2</sub> 271.1129, found 271.1130

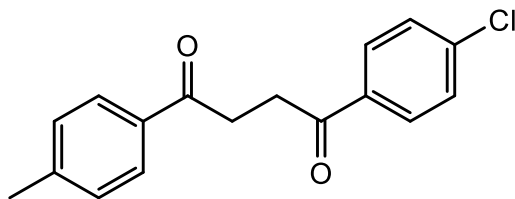

**19b**

22.1 mg, 77% yield. The spectra matched with the previous report.<sup>8</sup>

**<sup>1</sup>H NMR** (500 MHz, CDCl<sub>3</sub>) δ 7.98 (d, *J* = 8.5 Hz, 2H), 7.93 (d, *J* = 8.2 Hz, 2H), 7.45 (d, *J* = 8.6 Hz, 2H), 7.27 (d, *J* = 8.1 Hz, 2H), 3.47 – 3.37 (m, 4H), 2.42 (s, 3H).

**<sup>13</sup>C NMR** (125 MHz, CDCl<sub>3</sub>) δ 197.1, 196.6, 143.0, 138.5, 134.1, 133.2, 128.5, 128.3, 127.9, 127.2, 31.5, 31.4, 20.6.

**HRMS** (ESI-TOF, [M + H<sup>+</sup>]): calcd for C<sub>17</sub>H<sub>15</sub>ClO<sub>2</sub> 287.0833, found 287.0830

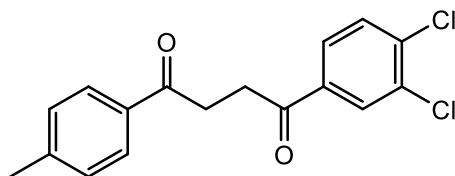

**20b**

26.3 mg, 82% yield.

**<sup>1</sup>H NMR** (500 MHz, CDCl<sub>3</sub>) δ 8.11 (d, *J* = 2.0 Hz, 1H), 7.92 (d, *J* = 8.1 Hz, 2H), 7.86 (dd, *J* = 8.3, 2.1 Hz, 1H), 7.57 (d, *J* = 8.4 Hz, 1H), 7.28 (d, *J* = 8.0 Hz, 2H), 3.44 (d, *J* = 6.2 Hz, 2H), 3.38 (d, *J* = 6.2 Hz, 2H), 2.42 (s, 3H).

**<sup>13</sup>C NMR** (125 MHz, CDCl<sub>3</sub>) δ 197.9, 196.7, 144.1, 137.7, 136.4, 134.1, 133.3, 130.7, 130.2, 129.3, 128.2, 127.2, 32.6, 32.4, 21.7.

**HRMS** (ESI-TOF, [M + H<sup>+</sup>]): calcd for C<sub>17</sub>H<sub>14</sub>Cl<sub>2</sub>O<sub>2</sub> 321.0444, found 321.0444

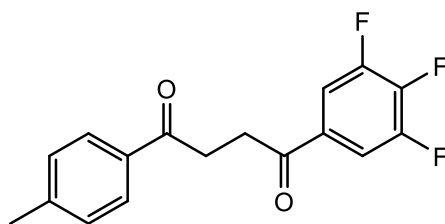

**21b**

25.7 mg, 84% yield.

**<sup>1</sup>H NMR** (500 MHz, CDCl<sub>3</sub>) δ 7.91 (d, *J* = 8.0 Hz, 2H), 7.68 (t, *J* = 7.1 Hz, 2H), 7.28 (d, *J* = 8.0 Hz, 2H), 3.45 (t, *J* = 6.1 Hz, 2H), 3.33 (t, *J* = 6.2 Hz, 2H), 2.42 (s, 3H).

**<sup>13</sup>C NMR** (125 MHz, CDCl<sub>3</sub>) δ 197.7, 195.4, 152.2 (d, *J* = 10.9 Hz), 150.2 (d, *J* = 7.0 Hz), 144.2, 142.2 (d, *J* = 15.5 Hz), 134.0, 132.4 (d, *J* = 4.9 Hz), 129.3, 128.2, 125.6, 112.8 (d, *J* = 5.4 Hz), 112.6 (d, *J* = 5.3 Hz), 32.5, 32.3, 21.7.

**<sup>19</sup>F NMR** (376 MHz, CDCl<sub>3</sub>) δ -137.01, -137.07, -157.18, -157.24, -157.29.

**HRMS** (ESI-TOF, [M + H<sup>+</sup>]): calcd for C<sub>17</sub>H<sub>13</sub>F<sub>3</sub>O<sub>2</sub> 307.0940, found 307.0946

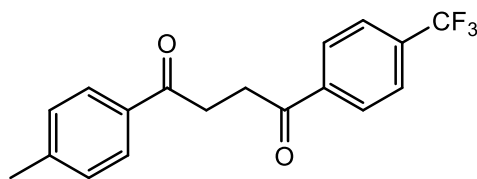

**22b**

22.4 mg, 70% yield.

**<sup>1</sup>H NMR** (500 MHz, CDCl<sub>3</sub>) δ 8.14 (d, *J* = 8.0 Hz, 2H), 7.93 (d, *J* = 7.9 Hz, 2H), 7.75 (d, *J* = 8.0 Hz, 2H), 7.28 (d, *J* = 8.0 Hz, 2H), 3.47 – 3.45 (m, 4H), 2.42 (s, 3H).

**<sup>13</sup>C NMR** (125 MHz, CDCl<sub>3</sub>) δ 198.0, 144.1, 139.5, 134.5, 134.3, 134.1, 129.3, 128.5, 128.2, 125.7, 125.7, 124.7, 122.5, 32.8, 32.5, 21.6.

**HRMS** (ESI-TOF, [M + H<sup>+</sup>]): calcd for C<sub>18</sub>H<sub>15</sub>F<sub>3</sub>O<sub>2</sub> 321.1097, found 321.1096

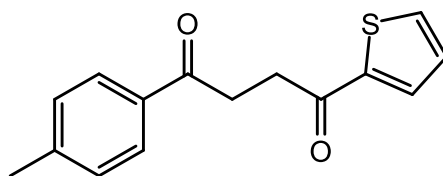

**23b**

17.6 mg, 68% yield. The spectra matched with the previous report.<sup>5</sup>

**<sup>1</sup>H NMR** (500 MHz, CDCl<sub>3</sub>) δ 7.95 (d, *J* = 8.0 Hz, 2H), 7.86 (d, *J* = 3.8 Hz, 1H), 7.66 (d, *J* = 5.0 Hz, 1H), 7.29 (d, *J* = 8.0 Hz, 2H), 7.17 (t, *J* = 4.4 Hz, 1H), 3.44 (dd, *J* = 16.9, 5.5 Hz, 4H), 2.44 (s, 3H).

**<sup>13</sup>C NMR** (125 MHz, CDCl<sub>3</sub>) δ 198.1, 191.8, 144.0, 144.0, 134.2, 133.5, 132.0, 129.3, 128.2, 128.1, 33.2, 32.5, 21.7.

**HRMS** (ESI-TOF, [M + H<sup>+</sup>]): calcd for, found C<sub>15</sub>H<sub>14</sub>O<sub>2</sub>S 259.0787, found 259.0787

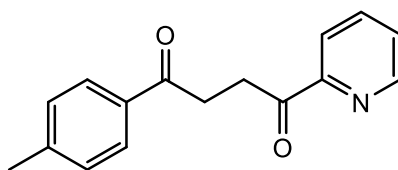

**24b**

22.0 mg, 87% yield.

**<sup>1</sup>H NMR** (500 MHz, CDCl<sub>3</sub>) δ 8.71 (d, *J* = 4.4 Hz, 1H), 8.04 (d, *J* = 7.8 Hz, 1H), 7.93 (d, *J* = 8.2 Hz, 2H), 7.85 – 7.82 (m, 1H), 7.49 – 7.46 (m, 1H), 7.27 (d, *J* = 5.8 Hz, 2H), 3.68 (t, *J* = 6.3 Hz, 2H), 3.45 (t, *J* = 6.3 Hz, 2H), 2.42 (s, 3H).

**<sup>13</sup>C NMR** (125 MHz, CDCl<sub>3</sub>) δ 200.6, 198.3, 153.3, 149.0, 143.8, 136.8, 134.4, 129.2, 128.2, 127.1, 121.8, 32.6, 32.0, 21.6.

**HRMS** (ESI-TOF, [M + H<sup>+</sup>]): calcd for C<sub>16</sub>H<sub>15</sub>NO<sub>2</sub> 254.1176, found 254.1176

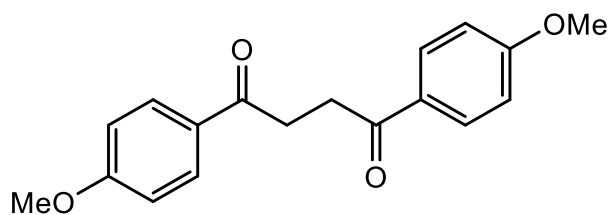

**25b**

19.7 mg, 66 % yield. The spectra matched with the previous report.<sup>3</sup>

**<sup>1</sup>H NMR** (500 MHz, CDCl<sub>3</sub>) δ 8.02 (d, *J* = 8.5 Hz, 4H), 6.95 (d, *J* = 8.5 Hz, 4H), 3.87 (s, 6H), 3.40 (s, 4H).

**<sup>13</sup>C NMR** (125 MHz, CDCl<sub>3</sub>) δ 197.4, 163.5, 130.4, 130.0, 113.7, 55.5, 32.3.

**HRMS** (ESI-TOF, [M + H<sup>+</sup>]): calcd for C<sub>18</sub>H<sub>18</sub>O<sub>4</sub> 299.1278, found 299.1282

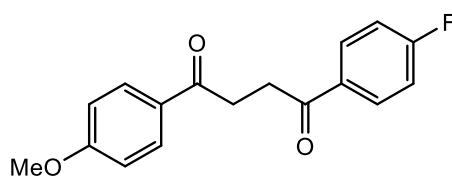

**26b**

22.0 mg, 77% yield. The spectra matched with the previous report.<sup>4</sup>

**<sup>1</sup>H NMR** (500 MHz, CDCl<sub>3</sub>) δ 8.09 – 8.04 (m, 2H), 8.01 (d, *J* = 8.9 Hz, 2H), 7.18 – 7.10 (m, 2H), 6.99 – 6.90 (m, 2H), 3.87 (s, 3H), 3.41 (d, *J* = 2.4 Hz, 4H).

**<sup>13</sup>C NMR** (125 MHz, CDCl<sub>3</sub>) δ 197.3, 197.1, 166.8, 164.8, 163.6, 133.3, 130.8, 130.7, 130.4, 129.8, 115.8, 115.6, 113.8, 55.5, 32.5, 32.2.

**HRMS** (ESI-TOF, [M + H<sup>+</sup>]): calcd for C<sub>17</sub>H<sub>15</sub>FO<sub>3</sub> 287.1078, found 287.1078

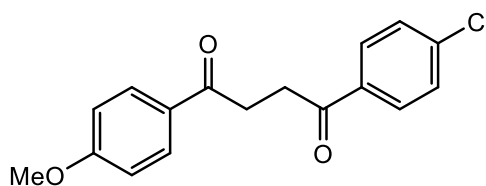

**27b**

22.4 mg, 74% yield. The spectra matched with the previous report.<sup>4</sup>

**<sup>1</sup>H NMR** (500 MHz, CDCl<sub>3</sub>) δ 8.02 – 7.97 (m, 4H), 7.45 (d, *J* = 8.6 Hz, 2H), 6.95 (d, *J* = 9.0 Hz, 2H), 3.88 (s, 3H), 3.42 – 3.40 (m, 1H).

**<sup>13</sup>C NMR** (125 MHz, CDCl<sub>3</sub>) δ 197.7, 197.0, 163.6, 139.5, 135.2, 130.4, 129.8, 129.6, 128.9, 113.8, 55.5, 32.6, 32.2.

**HRMS** (ESI-TOF, [M + H<sup>+</sup>]): calcd for C<sub>17</sub>H<sub>15</sub>ClO<sub>3</sub> 303.0782, found 303.0785

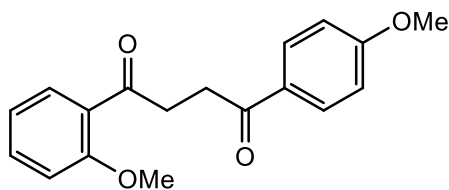

**28b**

23.0 mg, 77% yield.

**<sup>1</sup>H NMR** (500 MHz, CDCl<sub>3</sub>) δ 8.01 (d, *J* = 8.8 Hz, 2H), 7.77 – 7.75 (m, 1H), 7.48 – 7.44 (m, 1H), 7.03 – 6.91 (m, 4H), 3.91 (s, 3H), 3.86 (s, 3H), 3.44 (t, *J* = 6.3 Hz, 2H), 3.36 (t, *J* = 6.1 Hz, 2H).

**<sup>13</sup>C NMR** (125 MHz, CDCl<sub>3</sub>) δ 200.9, 197.6, 163.4, 158.8, 133.5, 130.5, 130.4, 130.1, 128.0, 120.6, 113.7, 111.6, 55.5, 55.5, 38.0, 32.6.

**HRMS** (ESI-TOF, [M + H<sup>+</sup>]): calcd for C<sub>18</sub>H<sub>18</sub>O<sub>4</sub> 299.1278, found 299.1282

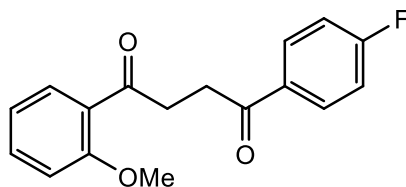

**29b**

21.8 mg, 76% yield.

**<sup>1</sup>H NMR** (500 MHz, CDCl<sub>3</sub>) δ 8.07 – 8.04 (m, 2H), 7.77 – 7.75 (m, 1H), 7.49 – 7.45 (m, 1H), 7.13 (t, *J* = 8.6 Hz, 2H), 7.02 – 6.97 (m, 2H), 3.92 (s, 3H), 3.46 (t, *J* = 6.3 Hz, 2H), 3.37 (t, *J* = 6.3 Hz, 2H).

**<sup>13</sup>C NMR** (125 MHz, CDCl<sub>3</sub>) δ 200.5, 197.5, 165.7 (d, *J* = 254.3 Hz), 158.9, 133.7, 133.4 (d, *J* = 3.1 Hz), 130.7 (d, *J* = 9.4 Hz), 130.5, 127.7, 120.7, 115.6 (d, *J* = 21.8 Hz), 111.6, 55.5, 37.9, 32.9.

**<sup>19</sup>F NMR** (376 MHz, CDCl<sub>3</sub>) δ -104.51.

**HRMS** (ESI-TOF, [M + H<sup>+</sup>]): calcd for C<sub>17</sub>H<sub>15</sub>FO<sub>3</sub> 287.1078, found 287.1180

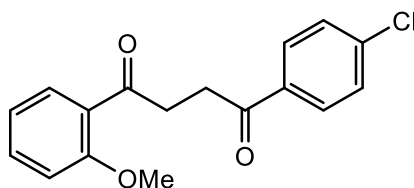

**30b**

23.0 mg, 76% yield.

**<sup>1</sup>H NMR** (500 MHz, CDCl<sub>3</sub>) δ 7.97 (d, *J* = 8.5 Hz, 2H), 7.77 – 7.75 (m, 1H), 7.51 – 7.45 (m, 1H), 7.44 (d, *J* = 8.5 Hz, 2H), 7.04 – 6.95 (m, 2H), 3.92 (s, 3H), 3.46 (t, *J* = 6.3 Hz, 2H), 3.36 (t, *J* = 6.4 Hz, 2H).

**<sup>13</sup>C NMR** (125 MHz, CDCl<sub>3</sub>) δ 200.4, 197.9, 158.9, 139.4, 135.3, 133.7, 130.5, 129.6, 128.9, 127.7, 120.7, 111.6, 55.5, 37.9, 32.9.

**HRMS** (ESI-TOF, [M + H<sup>+</sup>]): calcd for C<sub>17</sub>H<sub>15</sub>ClO<sub>3</sub> 303.0782, found 303.0792



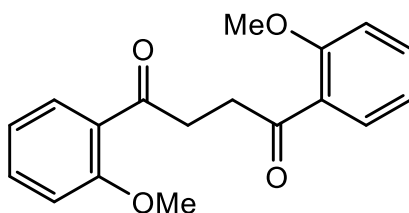

**31b**

26.0 mg, 87 % yield. The spectra matched with the previous report.<sup>12</sup>

**<sup>1</sup>H NMR** (500 MHz, CDCl<sub>3</sub>) δ 7.75 (d, *J* = 7.7 Hz, 2H), 7.46 (t, *J* = 7.1 Hz, 2H), 6.99 (q, *J* = 9.6, 9.1 Hz, 4H), 3.91 (s, 6H), 3.41 (s, 4H).

**<sup>13</sup>C NMR** (125MHz, CDCl<sub>3</sub>) δ 201.2, 158.7, 133.4, 130.4, 128.2, 120.6, 111.5, 55.5, 38.3.

**HRMS** (ESI-TOF, [M + H<sup>+</sup>]): calcd for C<sub>18</sub>H<sub>18</sub>O<sub>4</sub> 299.1278, found 299.1281

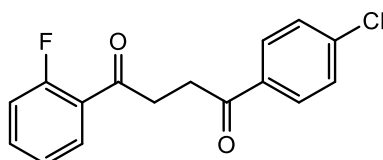

**32b**

20.9 mg, 76% yield. The spectra matched with the previous report.<sup>13</sup>

**<sup>1</sup>H NMR** (500 MHz, CDCl<sub>3</sub>) δ 7.97 (d, *J* = 8.4 Hz, 2H), 7.91 – 7.88 (m, 1H), 7.57 – 7.49 (m, 1H), 7.45 (d, *J* = 8.4 Hz, 1H), 7.24 (t, *J* = 7.6 Hz, 1H), 7.16 (dd, *J* = 11.3, 8.3 Hz, 1H), 3.45 (dd, *J* = 6.3, 3.2 Hz, 1H), 3.41 (d, *J* = 5.9 Hz, 1H).

**<sup>13</sup>C NMR** (125 MHz, CDCl<sub>3</sub>) δ 197.3, 196.8 (d, *J* = 4.1 Hz), 162.1 (d, *J* = 254.9 Hz), 139.5, 135.1, 134.7 (d, *J* = 9.1 Hz), 130.7 (d, *J* = 2.7 Hz), 129.6, 128.9, 125.4, 125.2, 124.5 (d, *J* = 3.4 Hz), 116.7 (d, *J* = 23.8 Hz), 37.4 (d, *J* = 8.5 Hz), 32.5.

**<sup>19</sup>F NMR** (376 MHz, CDCl<sub>3</sub>) δ -108.87.

**HRMS** (ESI-TOF, [M + H<sup>+</sup>]): calcd for C<sub>16</sub>H<sub>12</sub>ClFO<sub>2</sub> 291.0583, found 291.0583

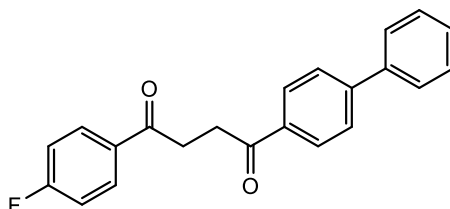

**33b**

25.3 mg, 76% yield.

**<sup>1</sup>H NMR** (500 MHz, CDCl<sub>3</sub>) δ 8.12 – 8.06 (m, 4H), 7.71 (d, *J* = 8.1 Hz, 2H), 7.64 (d, *J* = 7.2 Hz, 2H), 7.48 (t, *J* = 7.6 Hz, 2H), 7.41 (t, *J* = 7.3 Hz, 1H), 7.15 (t, *J* = 8.5 Hz, 2H), 3.48 (d, *J* = 5.5 Hz, 2H), 3.45 (d, *J* = 5.4 Hz, 2H).

$^{13}\text{C}$  NMR (125 MHz,  $\text{CDCl}_3$ )  $\delta$  198.2, 197.1, 165.8 (d,  $J = 254.7$  Hz), 145.9, 139.9, 135.4, 133.3 (d,  $J = 3.1$  Hz), 130.8 (d,  $J = 9.2$  Hz), 129.0, 128.7, 128.3, 127.3 (d,  $J = 2.4$  Hz), 115.7 (d,  $J = 21.9$  Hz), 32.6, 32.5.

$^{19}\text{F}$  NMR (376 MHz,  $\text{CDCl}_3$ )  $\delta$  -105.22.

HRMS (ESI-TOF,  $[\text{M} + \text{H}^+]$ ): calcd for  $\text{C}_{22}\text{H}_{17}\text{FO}_2$  333.1285, found 333.1289

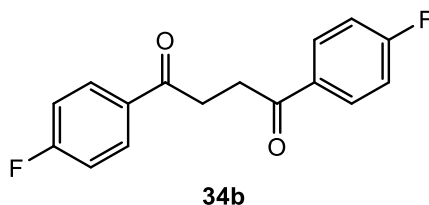

22.5 mg, 82% yield. The spectra matched with the previous report.<sup>4</sup>

$^1\text{H}$  NMR (500 MHz,  $\text{CDCl}_3$ )  $\delta$  8.07 – 8.05 (m, 4H), 7.15 (t,  $J = 8.5$  Hz, 4H), 3.42 (s, 4H).

$^{13}\text{C}$  NMR (125 MHz,  $\text{CDCl}_3$ )  $\delta$  197.0, 165.8 (d,  $J = 254.9$  Hz), 133.2, 130.8 (d,  $J = 9.4$  Hz), 115.7 (d,  $J = 21.9$  Hz), 32.4.

$^{19}\text{F}$  NMR (376 MHz,  $\text{CDCl}_3$ )  $\delta$  -105.11.

HRMS (ESI-TOF,  $[\text{M} + \text{H}^+]$ ): calcd for  $\text{C}_{16}\text{H}_{12}\text{F}_2\text{O}_2$  275.0878, found 275.0878

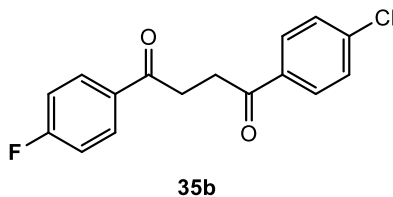

23.3 mg, 80% yield.

$^1\text{H}$  NMR (500 MHz,  $\text{CDCl}_3$ )  $\delta$  8.07 – 8.04 (m, 2H), 7.97 (d,  $J = 8.6$  Hz, 2H), 7.45 (d,  $J = 8.6$  Hz, 2H), 7.15 (t,  $J = 8.6$  Hz, 2H), 3.42 (s, 4H).

$^{13}\text{C}$  NMR (125 MHz,  $\text{CDCl}_3$ )  $\delta$  197.4, 196.9, 165.9 (d,  $J = 254.8$  Hz), 139.7, 135.0, 133.1, 130.8 (d,  $J = 9.2$  Hz), 129.5, 128.9, 115.7 (d,  $J = 22.0$  Hz), 32.5, 32.4.

$^{19}\text{F}$  NMR (376 MHz,  $\text{CDCl}_3$ )  $\delta$  -105.06.

HRMS (ESI-TOF,  $[\text{M} + \text{H}^+]$ ): calcd for  $\text{C}_{16}\text{H}_{12}\text{ClFO}_2$  291.0583, found 291.0588

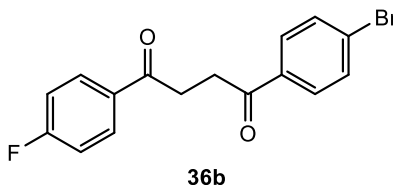

29.8 mg, 89% yield.

$^1\text{H}$  NMR (500 MHz,  $\text{CDCl}_3$ )  $\delta$  8.05 (dd,  $J = 8.7, 5.6$  Hz, 2H), 7.89 (d,  $J = 8.5$  Hz, 2H), 7.62 (d,  $J = 8.6$  Hz, 2H), 7.14 (t,  $J = 8.6$  Hz, 2H), 3.41 (s, 4H).

$^{13}\text{C}$  NMR (125 MHz,  $\text{CDCl}_3$ )  $\delta$  197.6, 196.9, 165.9 (d,  $J = 254.8$  Hz), 135.4, 133.1 (d,  $J = 3.1$  Hz), 131.9, 130.8 (d,  $J = 9.2$  Hz), 129.7, 128.4, 115.7 (d,  $J = 22.0$  Hz), 32.5, 32.4.

$^{19}\text{F}$  NMR (376 MHz,  $\text{CDCl}_3$ )  $\delta$  -105.04.

HRMS (ESI-TOF,  $[\text{M} + \text{H}^+]$ ): calcd for  $\text{C}_{16}\text{H}_{12}\text{BrFO}_2$  335.0077, found 335.0076

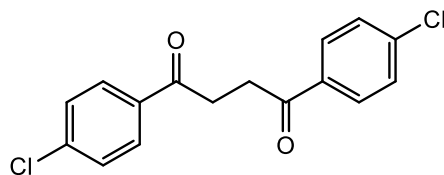

**37b**

29.5 mg, 96% yield. The spectra matched with the previous report.<sup>4</sup>

**<sup>1</sup>H NMR** (500 MHz, CDCl<sub>3</sub>) δ 7.97 (d, *J* = 8.6 Hz, 4H), 7.45 (d, *J* = 8.6 Hz, 4H), 3.42 (s, 4H).

**<sup>13</sup>C NMR** (125 MHz, CDCl<sub>3</sub>) δ 197.3, 139.7, 135.0, 129.5, 129.0, 32.5.

**HRMS** (ESI-TOF, [M + H<sup>+</sup>]): calcd for C<sub>16</sub>H<sub>12</sub>Cl<sub>2</sub>O<sub>2</sub> 307.0287, found 307.0287

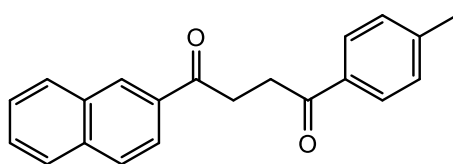

**38b**

21.2 mg, 70% yield.

**<sup>1</sup>H NMR** (500 MHz, CDCl<sub>3</sub>) δ 8.59 (s, 1H), 8.08 (d, *J* = 8.4 Hz, 1H), 7.99 – 7.96 (m, 3H), 7.90 (dd, *J* = 12.4, 8.3 Hz, 2H), 7.58 (dt, *J* = 22.7, 7.0 Hz, 2H), 7.29 (d, *J* = 7.9 Hz, 2H), 3.60 (t, *J* = 6.4 Hz, 2H), 3.50 (t, *J* = 6.4 Hz, 2H), 2.43 (s, 3H).

**<sup>13</sup>C NMR** (125 MHz, CDCl<sub>3</sub>) δ 198.8, 198.4, 144.0, 135.7, 134.3, 134.2, 132.6, 129.9, 129.6, 129.3, 128.4, 128.3, 127.8, 126.7, 123.9, 32.7, 32.6, 21.7.

**HRMS** (ESI-TOF, [M + H<sup>+</sup>]): calcd for C<sub>21</sub>H<sub>18</sub>O<sub>2</sub> 303.1380, found 303.1383

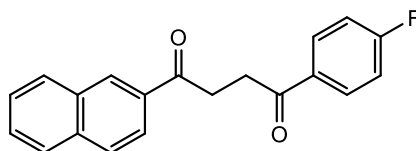

**39b**

20.5 mg, 67% yield.

**<sup>1</sup>H NMR** (500 MHz, CDCl<sub>3</sub>) δ 8.59 (s, 1H), 8.11 – 8.07 (m, 3H), 7.99 (d, *J* = 8.0 Hz, 1H), 7.92 – 7.88 (m, 2H), 7.63 – 7.55 (m, 2H), 7.16 (t, *J* = 8.6 Hz, 2H), 3.61 (t, *J* = 6.3 Hz, 2H), 3.48 (t, *J* = 6.3 Hz, 2H).

**<sup>13</sup>C NMR** (125 MHz, CDCl<sub>3</sub>) δ 198.5, 197.2, 165.8 (d, *J* = 254.8 Hz), 135.7, 134.0, 133.2, 132.5, 130.8 (d, *J* = 9.3 Hz), 129.9, 129.6, 128.5 (d, *J* = 3.3 Hz), 127.8, 126.8, 123.8, 115.7 (d, *J* = 21.9 Hz), 32.7, 32.6.

**<sup>19</sup>F NMR** (376 MHz, CDCl<sub>3</sub>) δ -105.20.

**HRMS** (ESI-TOF, [M + H<sup>+</sup>]): calcd for C<sub>20</sub>H<sub>15</sub>FO<sub>2</sub> 307.1129, found 307.1133

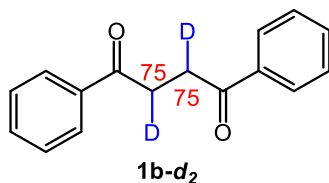

**<sup>1</sup>H NMR** (500 MHz, CDCl<sub>3</sub>) δ 8.04 (d, *J* = 7.2 Hz, 4H), 7.58 (t, *J* = 7.4 Hz, 2H), 7.48 (t, *J* = 7.6 Hz, 4H), 3.47 – 3.43 (m, 2.66H).

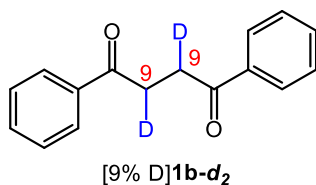

**<sup>1</sup>H NMR** (500 MHz, CDCl<sub>3</sub>) δ 8.04 (d, *J* = 7.8 Hz, 4H), 7.58 (t, *J* = 7.4 Hz, 2H), 7.48 (t, *J* = 7.4 Hz, 4H), 3.47 (s, 3.83H).

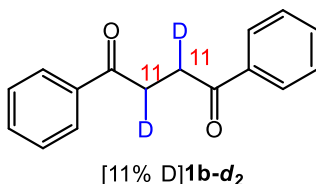

**<sup>1</sup>H NMR** (500 MHz, CDCl<sub>3</sub>) δ 8.04 (d, *J* = 7.4 Hz, 4H), 7.58 (t, *J* = 7.4 Hz, 2H), 7.48 (t, *J* = 7.6 Hz, 4H), 3.47 (s, 3.79H).

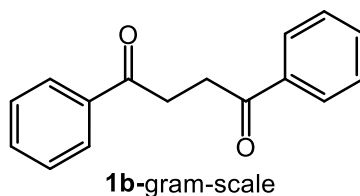

**<sup>1</sup>H NMR** (500 MHz, CDCl<sub>3</sub>) δ 8.08 (d, *J* = 7.4 Hz, 4H), 7.61 (t, *J* = 7.3 Hz, 2H), 7.52 (t, *J* = 7.8 Hz, 4H), 3.51 (s, 4H).

**<sup>13</sup>C NMR** (125 MHz, CDCl<sub>3</sub>) δ 198.7, 136.8, 133.2, 128.6, 128.1, 32.6.

**HRMS** (ESI-TOF, [M + H<sup>+</sup>]): calcd for C<sub>16</sub>H<sub>14</sub>O<sub>2</sub> 239.1067, found 239.1066

### 13. References

- 1 X. Zhu, Y. Liu, C. Liu, H. Yang and H. Fu, *Green Chem.*, 2020, **22**, 4357–4363
- 2 Y. Dong, R. Li, J. Zhou, and Z. Sun, *Org. Lett.*, 2021, **23**, 6387–6390
- 3 P. Mizar and T. Wirth, *Angew. Chem. Int. Ed.*, 2014, **53**, 5993–5997
- 4 L. Xu, X. Liu, G. R. Alvey, A. Shatskiy, J. Q. Liu, M. D. Karkas and X. S. Wang, *Org. Lett.*, 2022, **24**, 4513–4518
- 5 L. H. Wang and J. Zhao, *Eur. J. Org. Chem.*, 2018, **31**, 4345–4348

- 6 J. Xuan, Z. J. Feng, J. R. Chen, L. Q. Lu and W. J. Xiao, *Chem. Eur. J.*, 2014, **20**, 3045 – 3049
- 7 Y. Liu, S. Liu, D. Li, N. Zhang, L. Peng, J. Ao, C. E. Song, Y. Lan and H. L. Yan, *J. Am. Chem. Soc.*, 2019, **141**, 1150–1159
- 8 Z. L. Shen, K. Goh, H. L. Cheong, C. Wong, Y. C. Lai, Y. S. Yang, and T.P. Loh, *J. Am. Chem. Soc.*, 2010, **132**, 15852–15855
- 9 D. Ba, S. Wen, Q. Tian, Y. Chen, W. W. Lv and G. Cheng, *Nat. Commun.*, 2020, **11**, 4219-4225
- 10 W. Kong, C. Yu, H. An, and Q. Song, *Org. Lett.*, 2018, **20**, 349–352
- 11 S. R. Chowdhury, D. Singh, I. U. Hoque, and S. Maity, *J. Org. Chem.*, 2020, **85**, 13939–13950
- 12 D. H. Yu, W. P. To, G. S. Mingtong, L. L. Wu, K.T. Chan, L. L. Du, D. L. Phillips, Y. G. Liu and C. M. Che, *Chem. Sci.*, 2020, **11**, 6370–6382
- 13 Y. Zhang, X. Li, L. Xu, X. Xie, Y. Lu and Z. Zhang, *Org. Lett.*, 2022, **24**, 7512–7516
- 14 Q. Liu, R.-G. Wang, H.-J. Song, Y.-X. Liu and Q.-M. Wang, *Adv. Synth. Catal.*, 2020, **362**, 4391-4396
- 15 J. A. Clement, A. K. Mohanakrishnan, *Tetrahedron*, 2010, **66**, 2340-2350
- 16 M. Periasamy, M. Seenivasaperumal, V. D. Rao, *Synthesis*, 2003, **16**, 2507-2510
- 17 W.-L. Xu, W. Hu, W.-M. Zhao, M. Wang, J. Chen, and L. Zhou, *Org. Lett.*, 2020, **22**, 7169–7174
- 18 P. A. Cranwell and J. E. Saxton, *J. Chem. Soc.*, 1962, 3482-3487

### The completed references in manuscript

Other citations of ref. 2 in the manuscript: (d) B. K. Peters, T. Zhou, J. Rujirawanich, A. Cadu, T. Singh, W. Rabten, S. Kerdphon and P. G. Andersson, *J. Am. Chem. Soc.*, 2014, **136**, 16557-16562; (e) K. Tokmic, C. R. Markus, L. Zhu and A. R. Fout, *J. Am. Chem. Soc.*, 2016, **138**, 11907-11913; (f) S. A. Green, S. W. M. Crossley, J. L. M. Matos, S. Vasquez-Cespedes, S. L. Shevick, and R. A. Shenvi, *Acc. Chem. Res.*, 2018, **51**, 2628-2640.

Other citations of ref. 6 in the manuscript: (d) T. Amaya, Y. Maegawa, T. Masuda, Y. Osafune and T. Hirao, *J. Am. Chem. Soc.*, 2015, **137**, 10072-10075; (e) C. Liu, Y. Deng, J. Wang, Y. Yang, S. Tang and A. Lei, *Angew. Chem. Int. Ed.*, 2011, **50**, 7337-7341; (f) P. Setzer, A. Beauseigneur, M. S. M. Pearson-Long and P. Bertus, *Angew. Chem. Int. Ed.*, 2010, **49**, 8691-8694; (g) H. Stetter, *Angew. Chem. Int. Ed.*, 1976, **15**, 639-647; (h) M. M. D. Wilde and M. Gravel, *Angew. Chem. Int. Ed.*, 2013, **52**, 12651-12654.

Other citations of ref. 7 in the manuscript: (c) D.-M. Cui, M. Kawamura, S. Shimada, T. Hayashi and M. Tanaka, *Tetrahedron Lett.*, 2003, **44**, 4007-4010; (d) Y. Y. Cheng, J. X. Yu, T. Lei, H. Y. Hou, B. Chen, C. H. Tung and L. Z. Wu, *Angew. Chem. Int. Ed.*, 2021, **60**, 26822-26828; (e) L. Wang, J. Sun, J. Xia, M. Li, L. Zhang, R. Ma, G. Zheng and Q. Zhang, *Sci. China Chem.*, 2022, **65**, 1938-1944.

Other citations of ref. 8 in the manuscript: (d) K. J. Jiao, Y. K. Xing, Q. L. Yang, H. Qiu and T. S. Mei, *Acc. Chem. Res.*, 2020, **53**, 300-310; (e) L. Ackermann, *Acc. Chem. Res.*, 2020, **53**, 84-104; (f) L. F. T. Novaes, J. Liu, Y. Shen, L. Lu, J. M. Meinhardt and S. Lin, *Chem. Soc. Rev.*, 2021, **50**, 7941-8002; (g) Y. Yuan, J. Yang and A. Lei, *Chem. Soc. Rev.*, 2021, **50**, 10058-10086; (h) P. Xiong and H.-C. Xu, *Acc. Chem. Res.*, 2019, **52**, 3339-3350.

Other citations of ref. 9 in the manuscript: (e) D. F. Yang, Z. P. Guan, Y. N. Peng, S. X. Zhu, P. J. Wang, Z. L. Huang, H. Alhumade, D. Gu, H. Yi and A. Lei, *Nat. Commun.*, 2023, **14**, 1476-1484;

(f) L.-H. Jie, B. Guo, J. Song, and H.-C. Xu, *J. Am. Chem. Soc.*, 2022, **144**, 2343-2350; (g) Y. Gao, B. Zhang, J. He, and P. S. Baran, *J. Am. Chem. Soc.*, 2023, **145**, 11518-11523; (h) W. Zhang and S. Lin, *J. Am. Chem. Soc.*, 2020, **142**, 20661-20670.

#### 14. NMR spectra

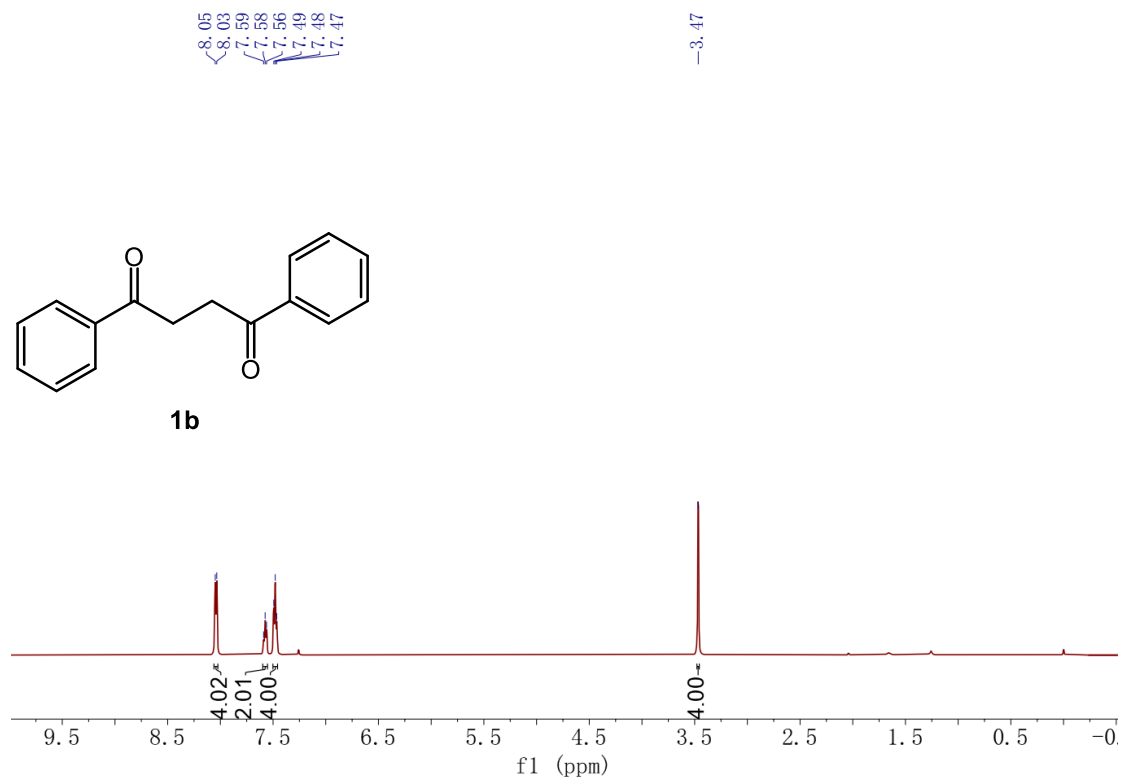

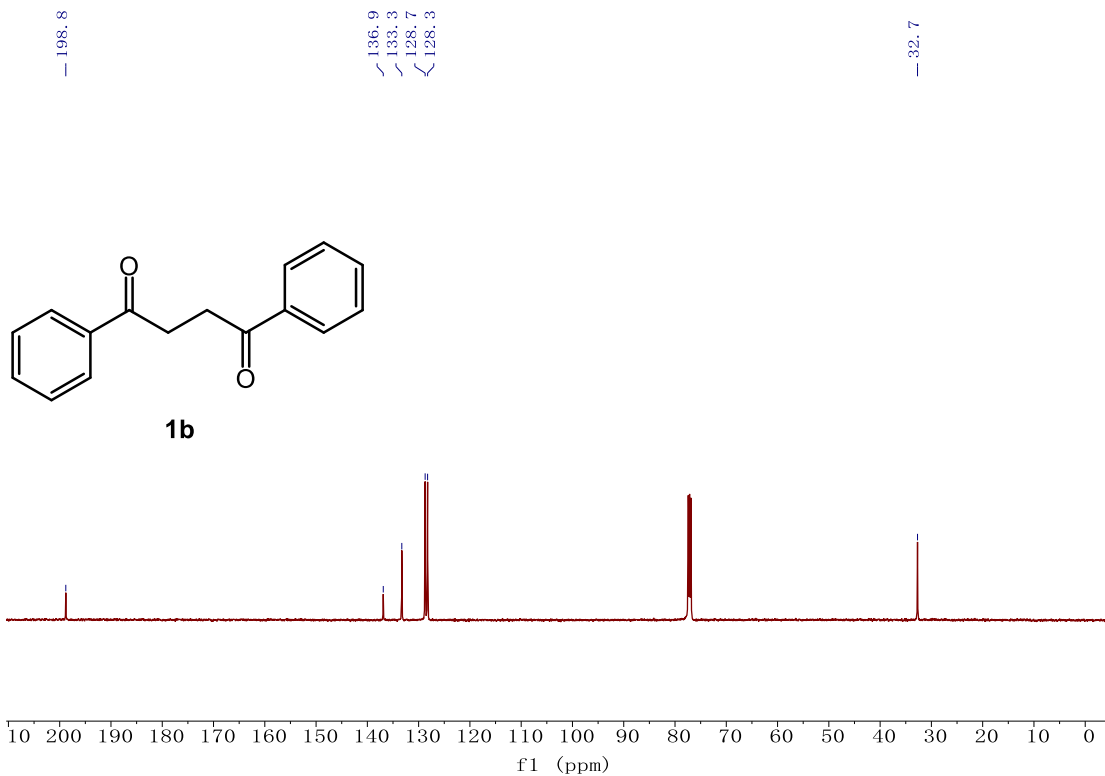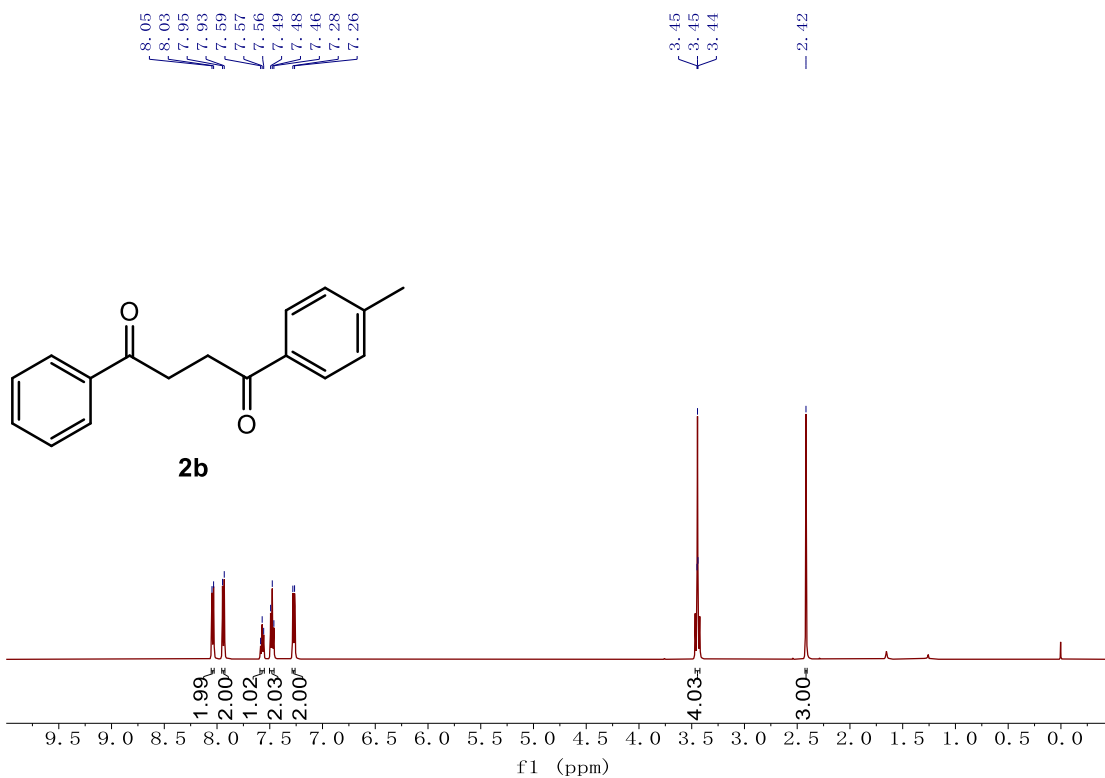

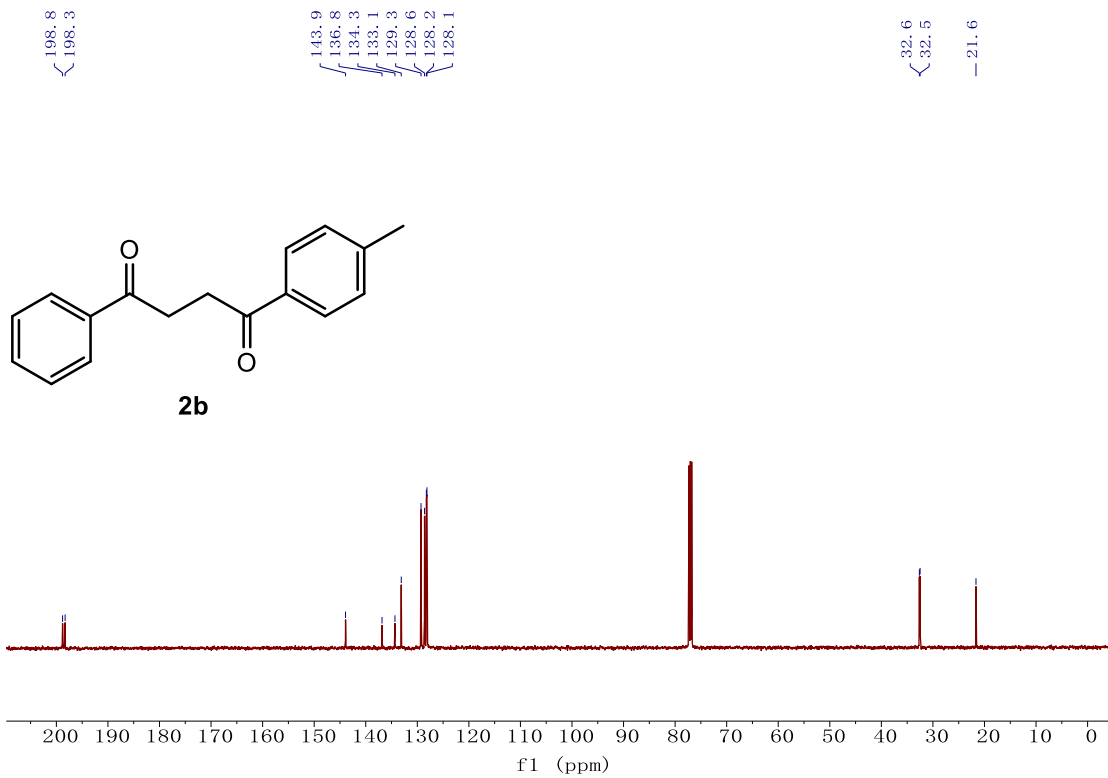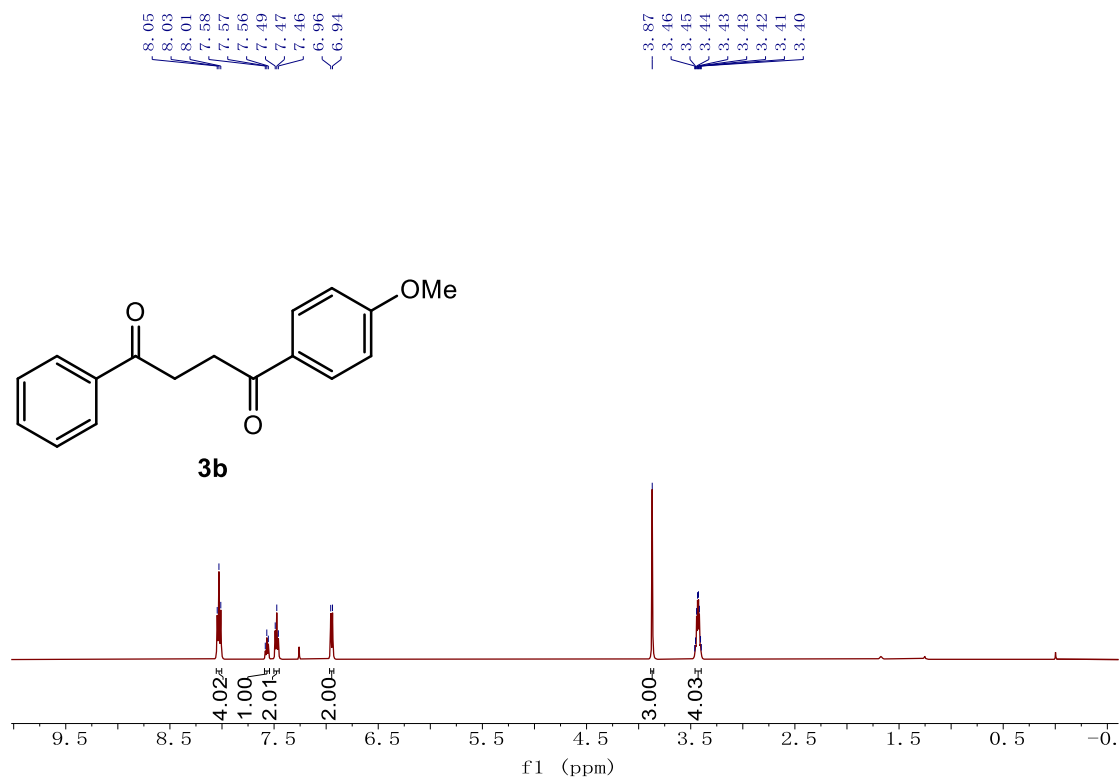



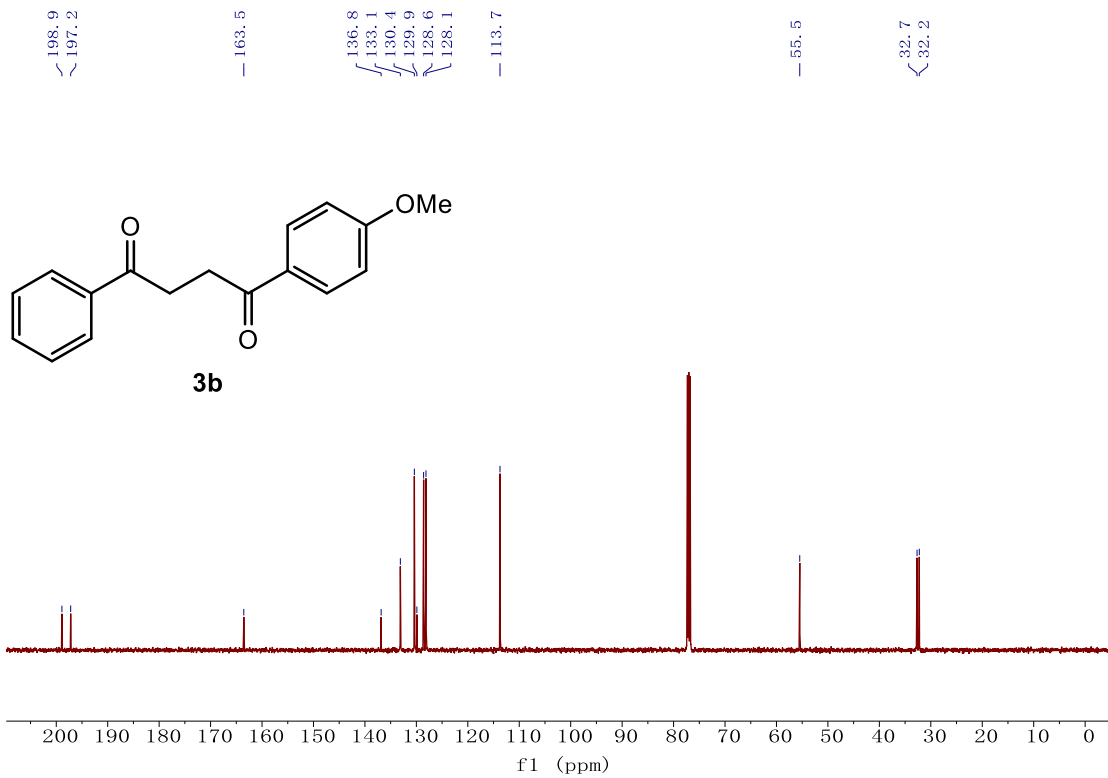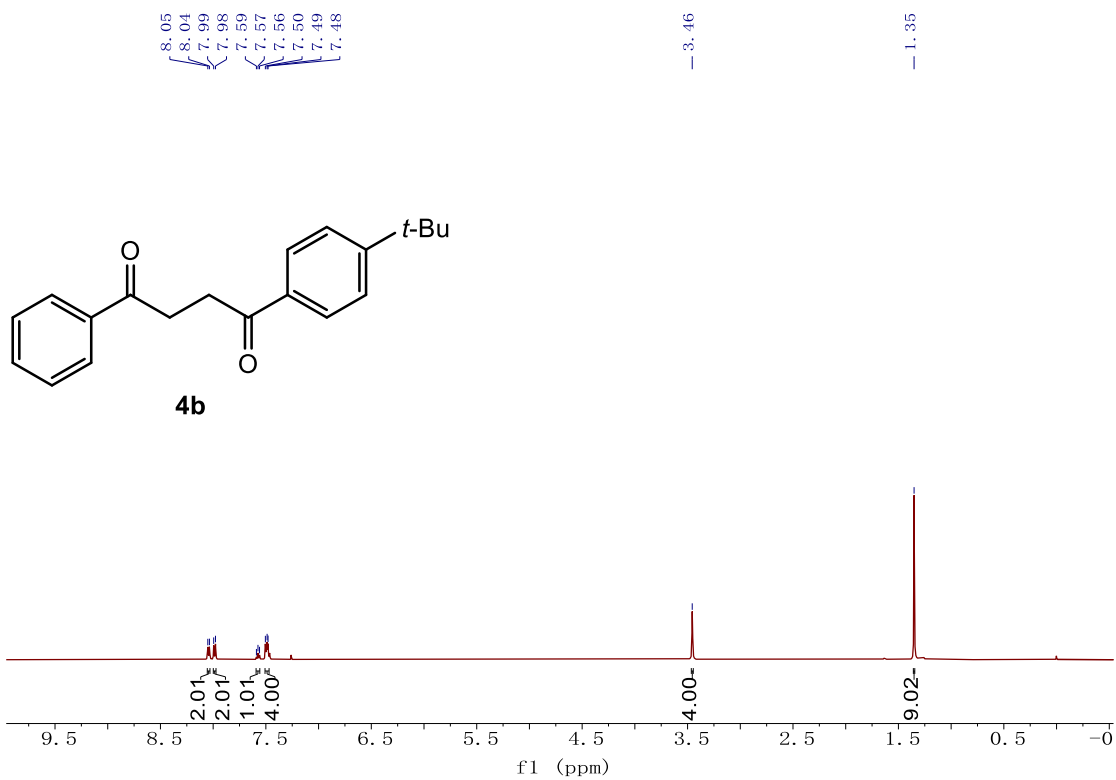

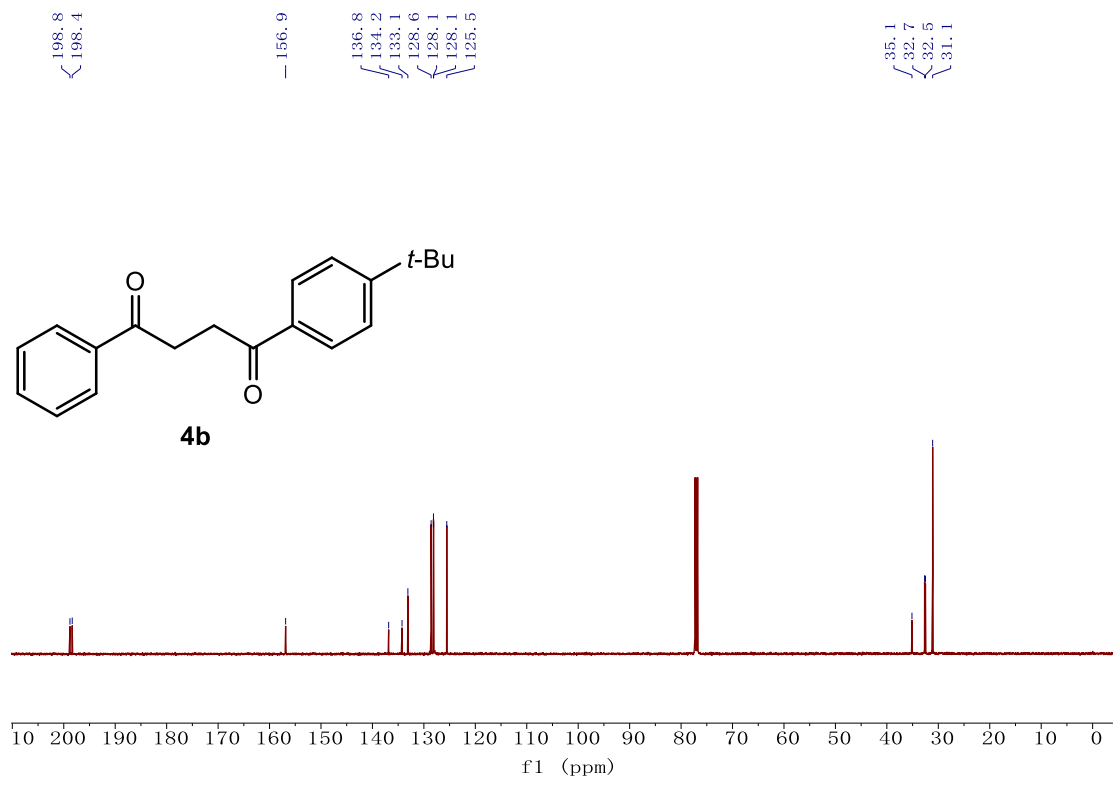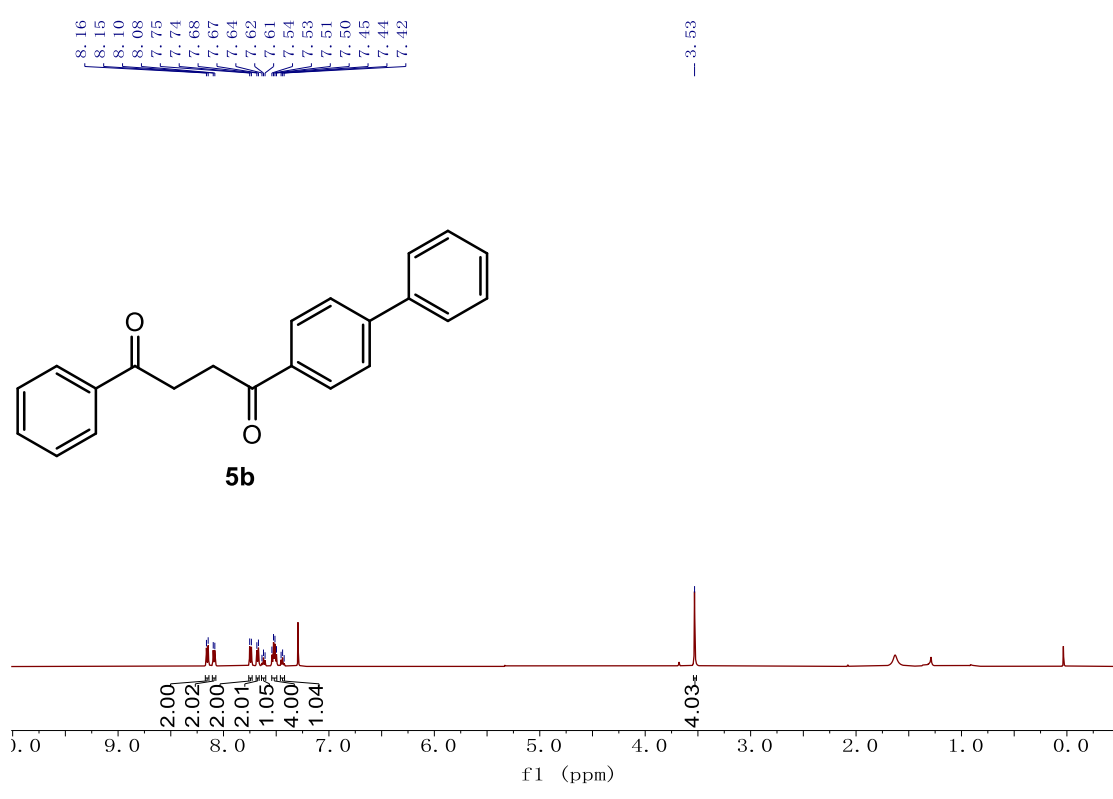

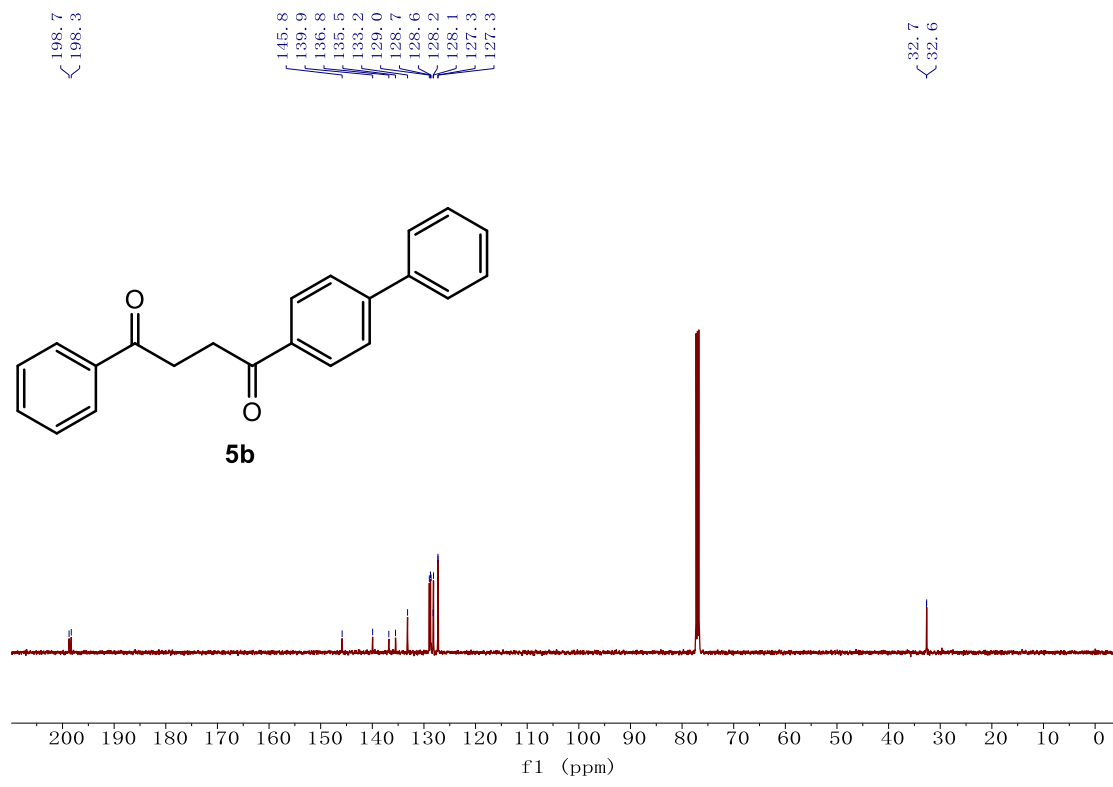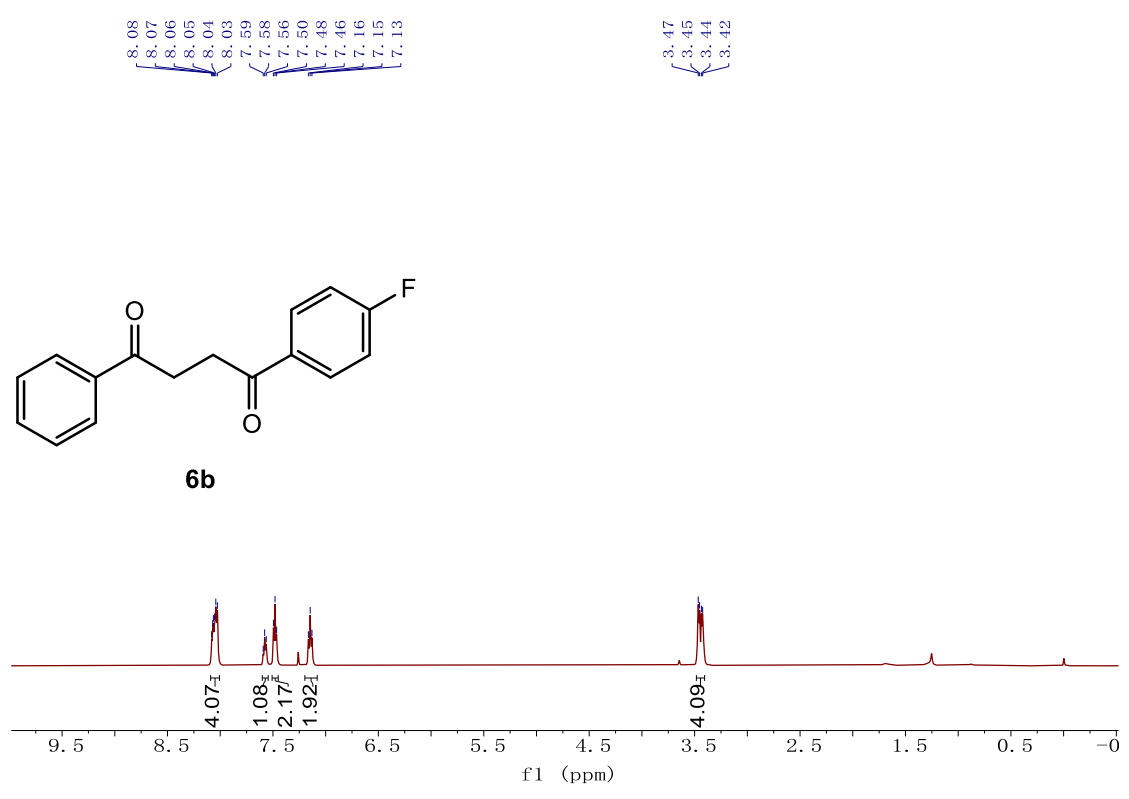

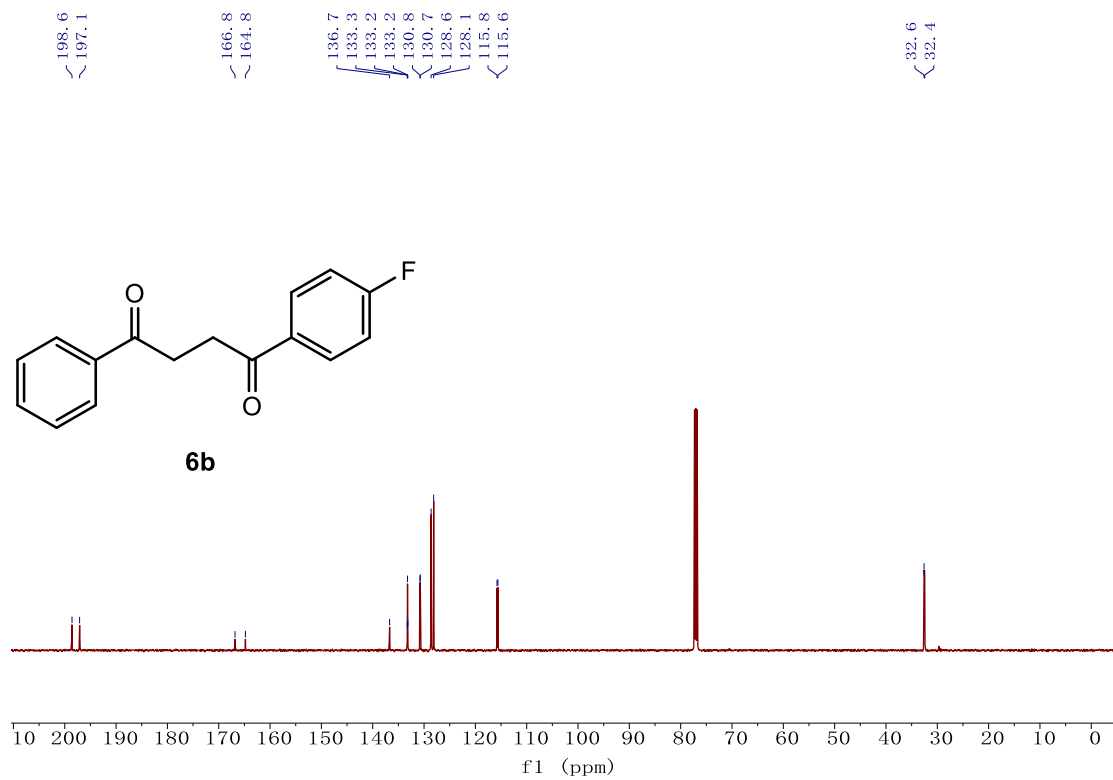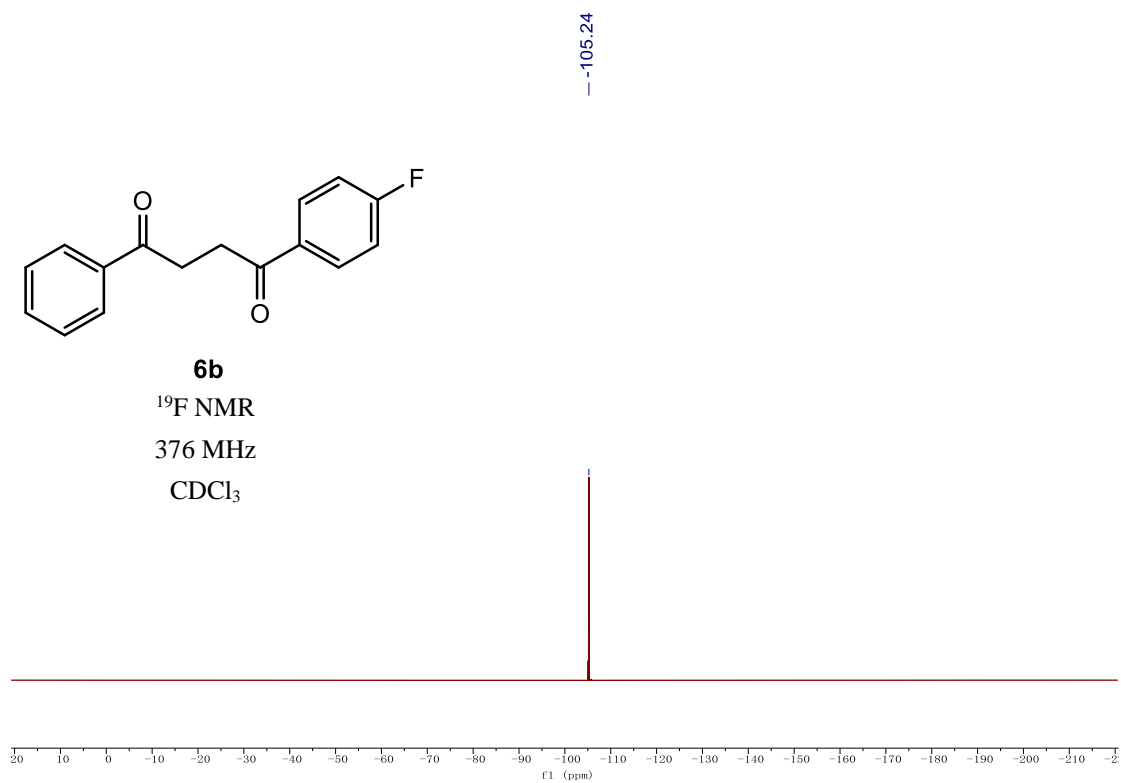

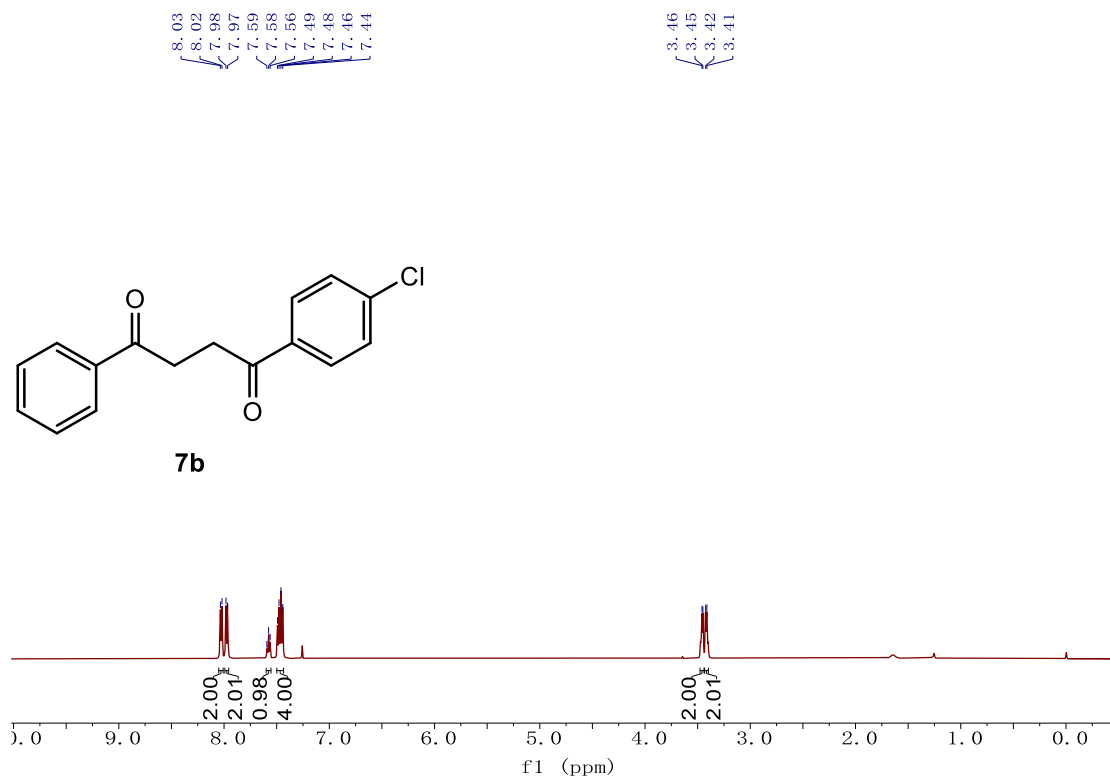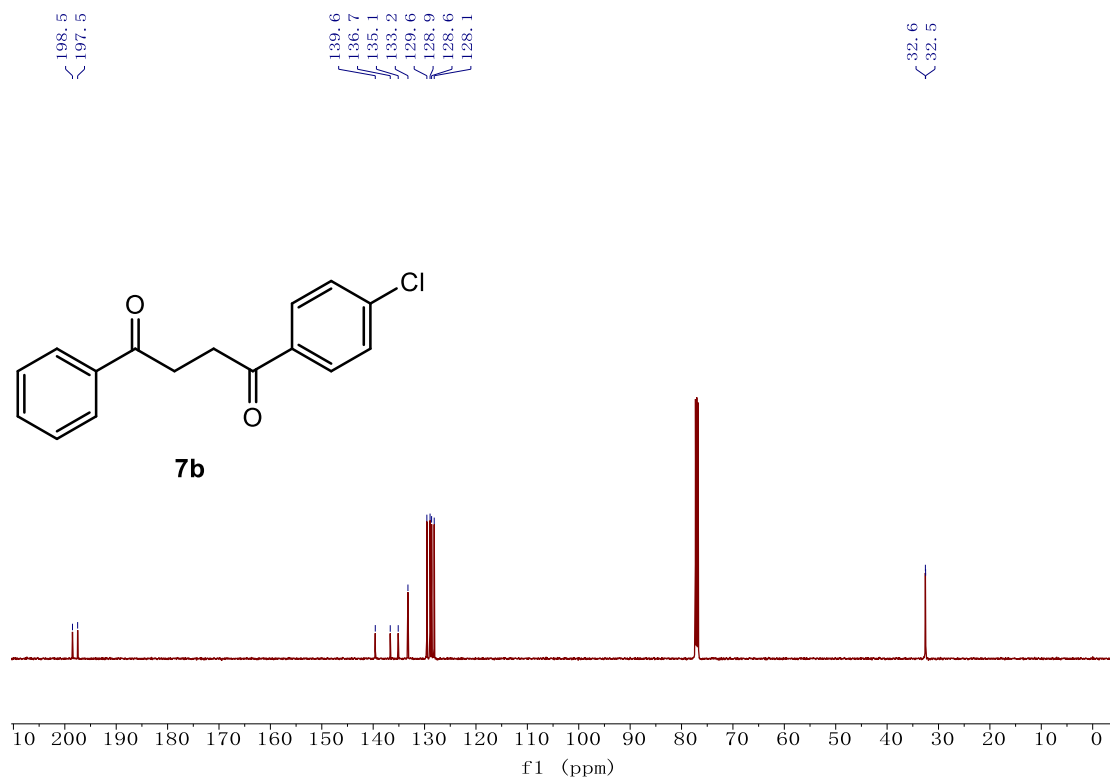

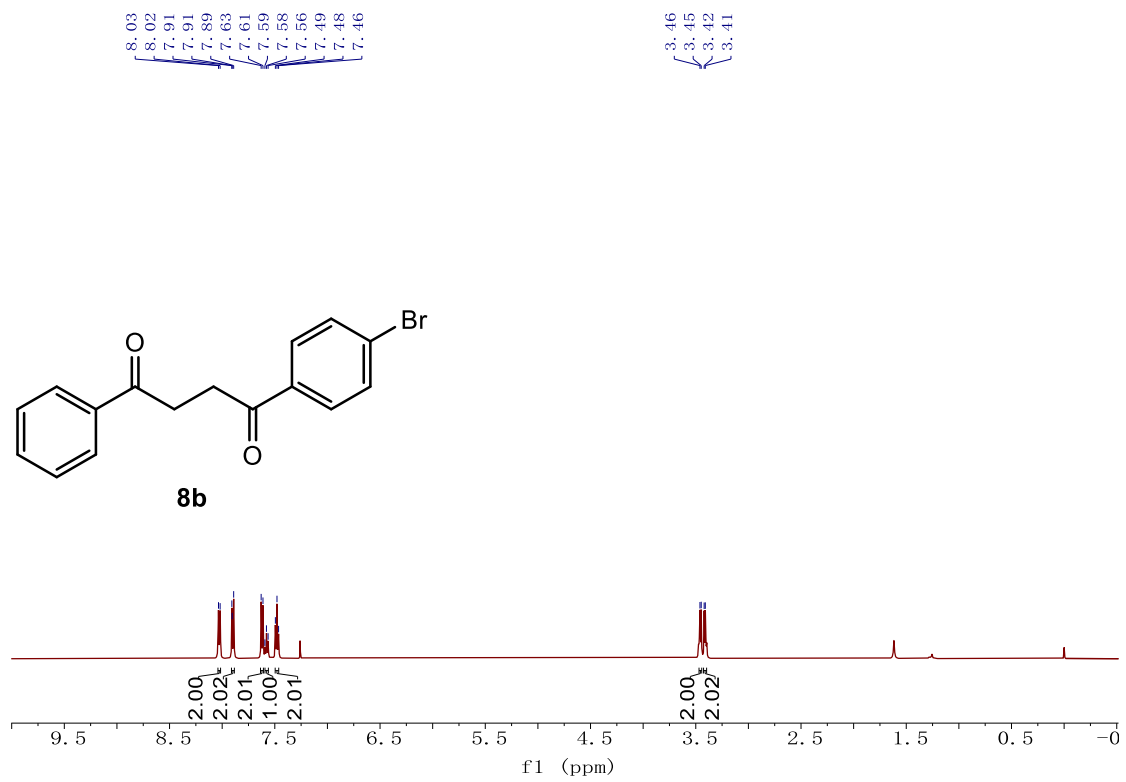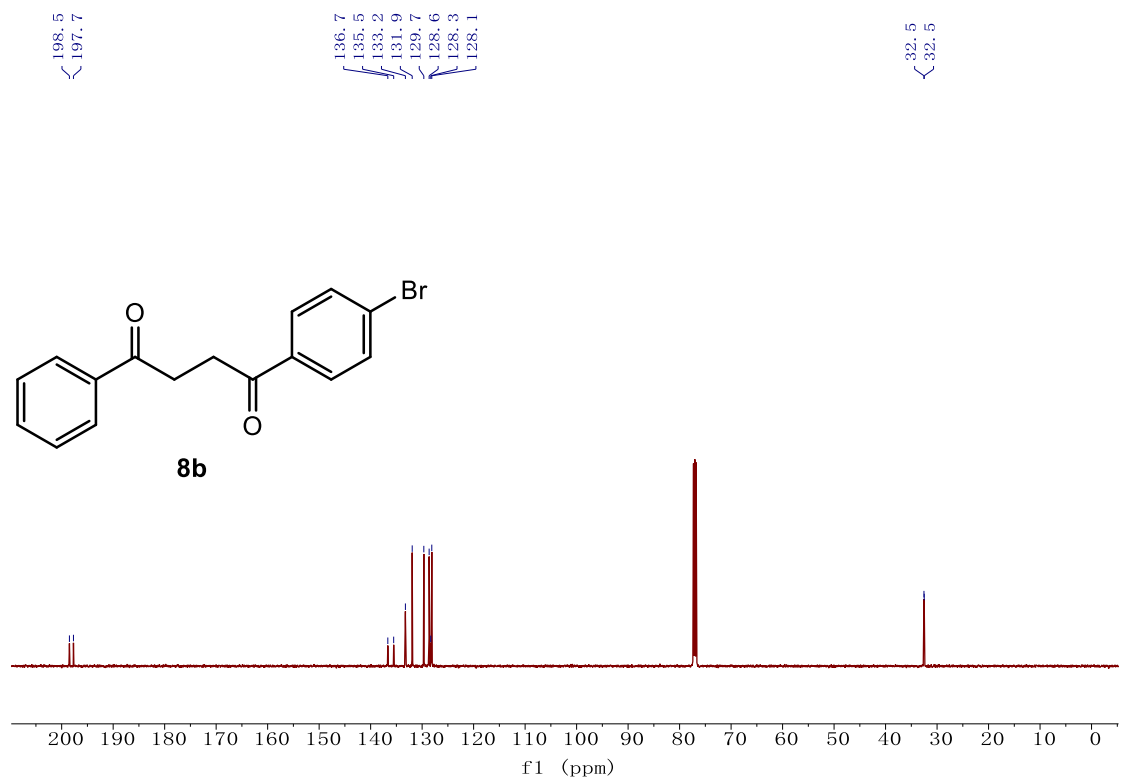

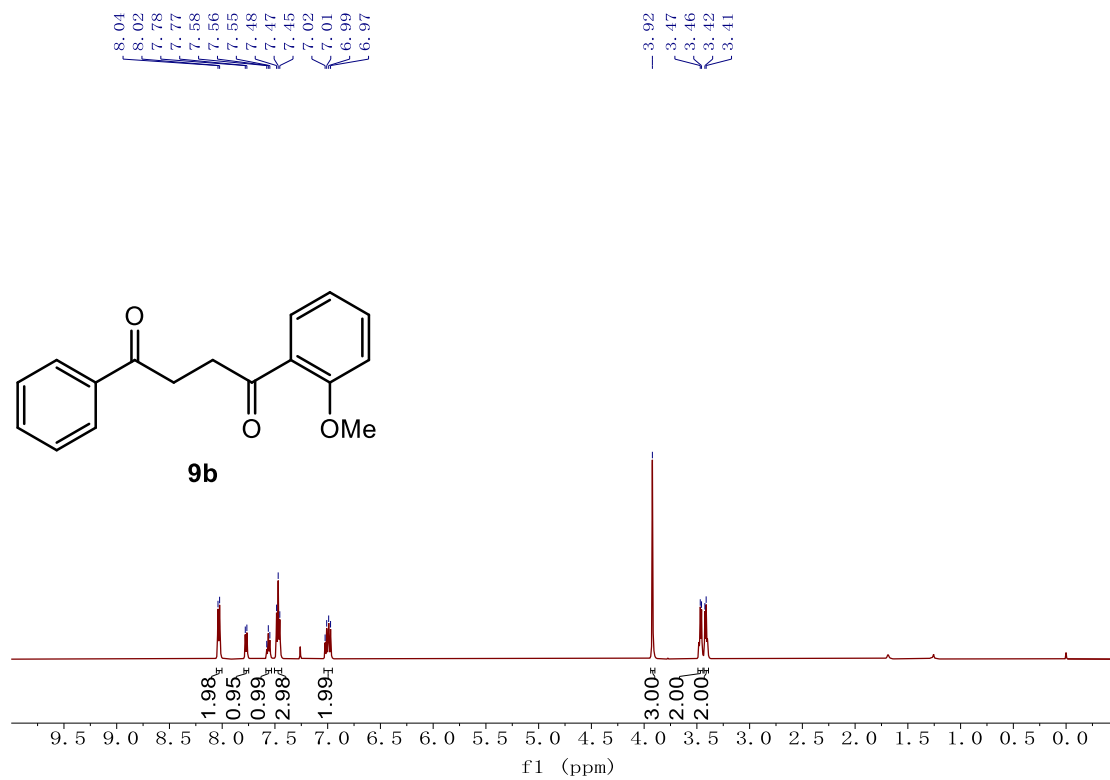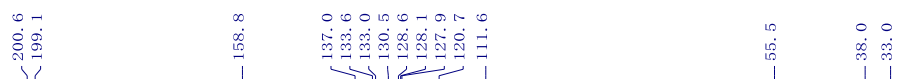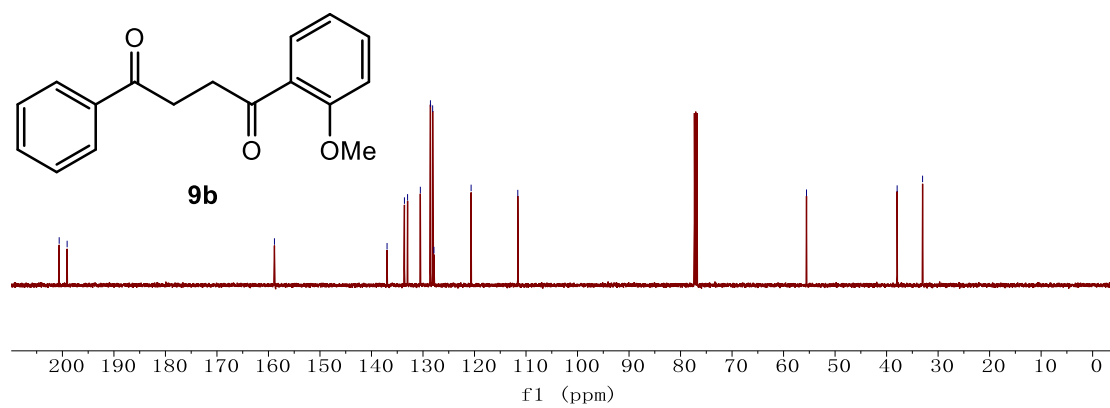

8.04  
8.04  
8.02  
8.02  
7.92  
7.90  
7.90  
7.88  
7.88  
7.59  
7.59  
7.58  
7.58  
7.57  
7.56  
7.55  
7.55  
7.55  
7.54  
7.53  
7.53  
7.53  
7.52  
7.52  
7.51  
7.51  
7.51  
7.50  
7.49  
7.49  
7.47  
7.46  
7.45  
7.45  
7.25  
7.25  
7.23  
7.23  
7.21  
7.21  
7.18  
7.18  
7.16  
7.15  
7.15  
7.13  
7.13  
3.45  
3.45

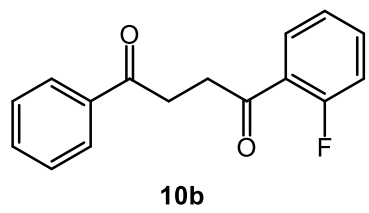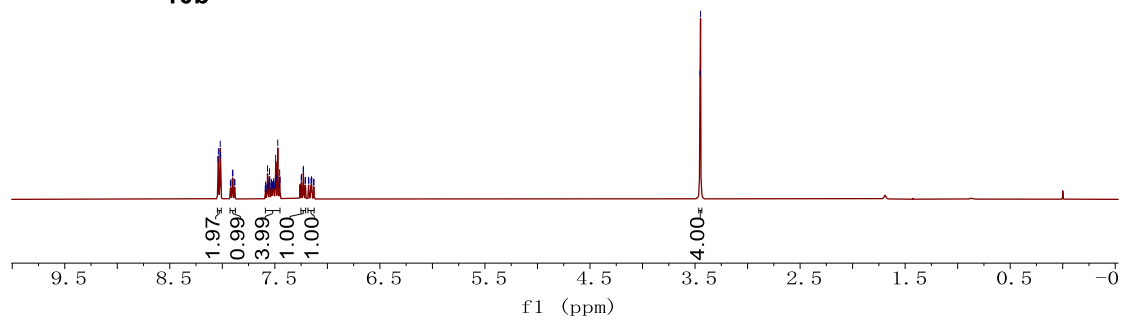

198.5  
197.0  
197.0  
163.4  
160.9  
136.8  
134.7  
134.6  
133.1  
130.7  
130.7  
128.6  
128.1  
125.5  
125.4  
124.5  
124.4  
116.8  
116.6  
37.5  
37.4  
32.6  
32.6

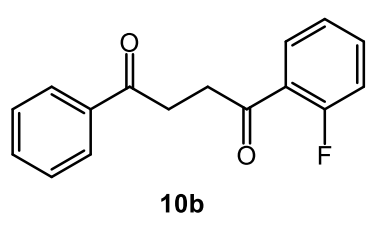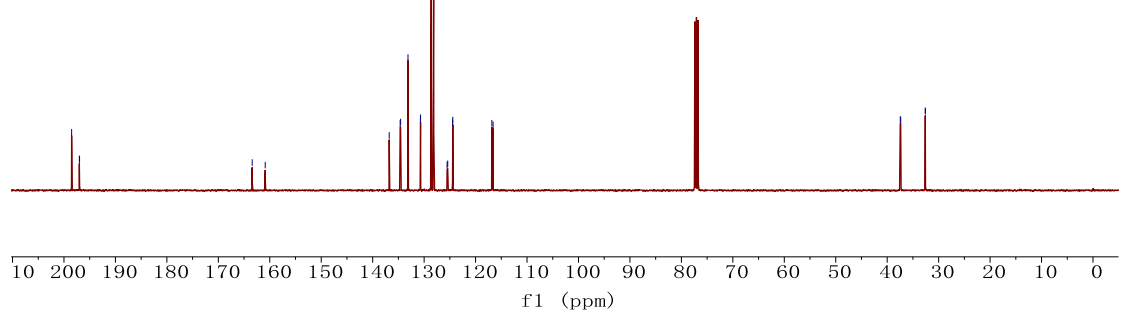



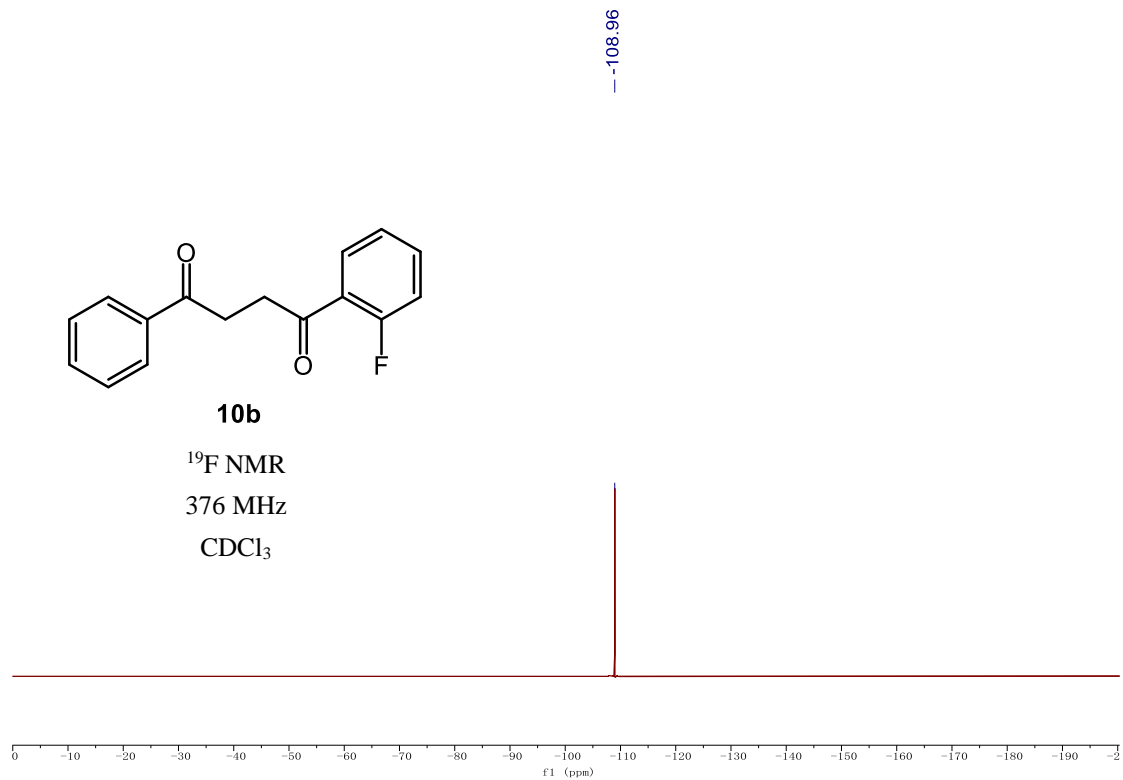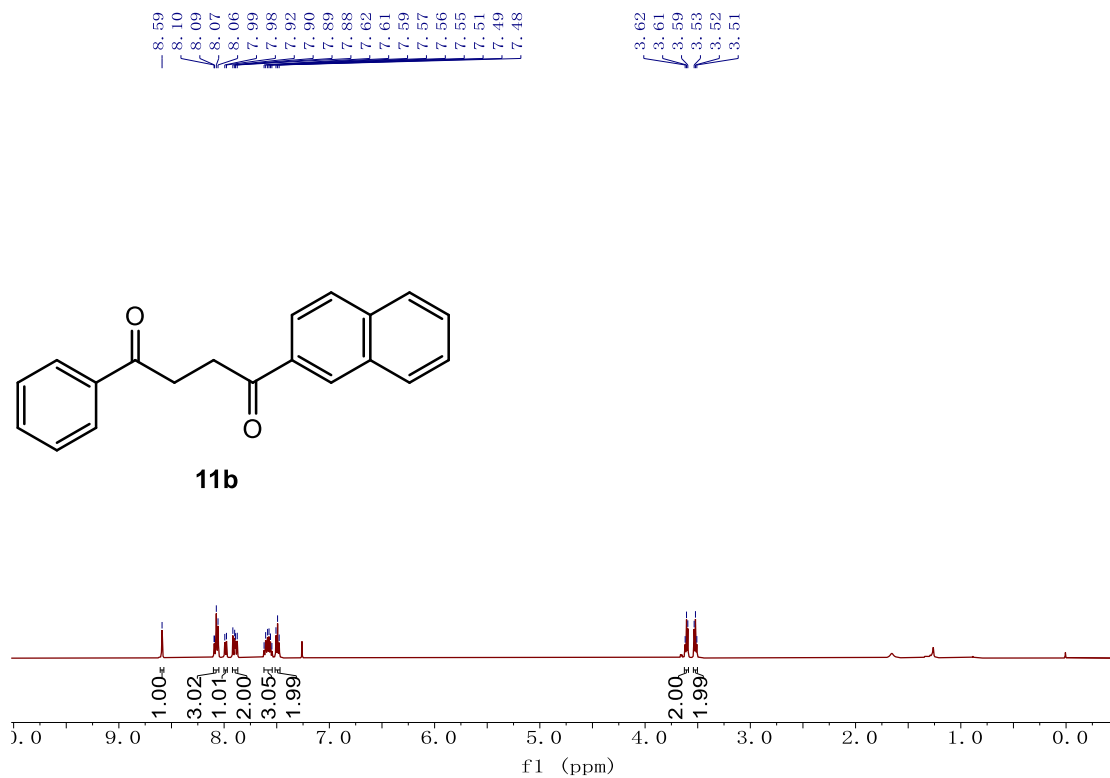

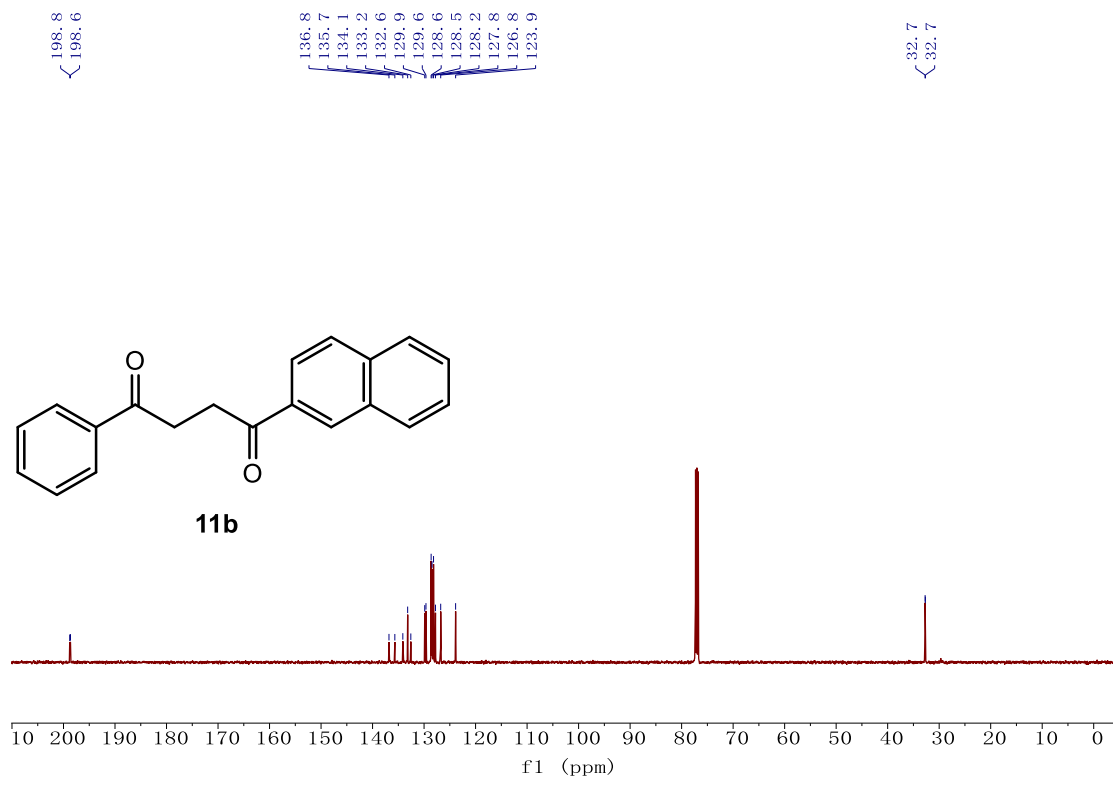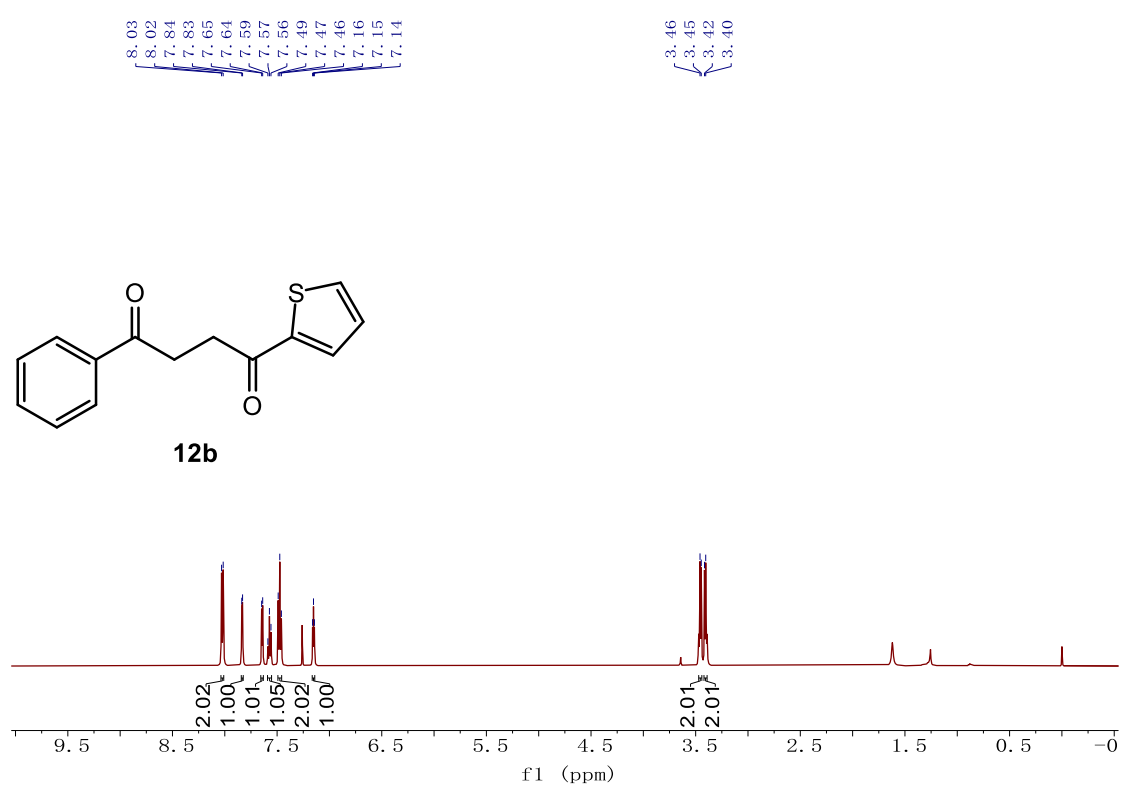

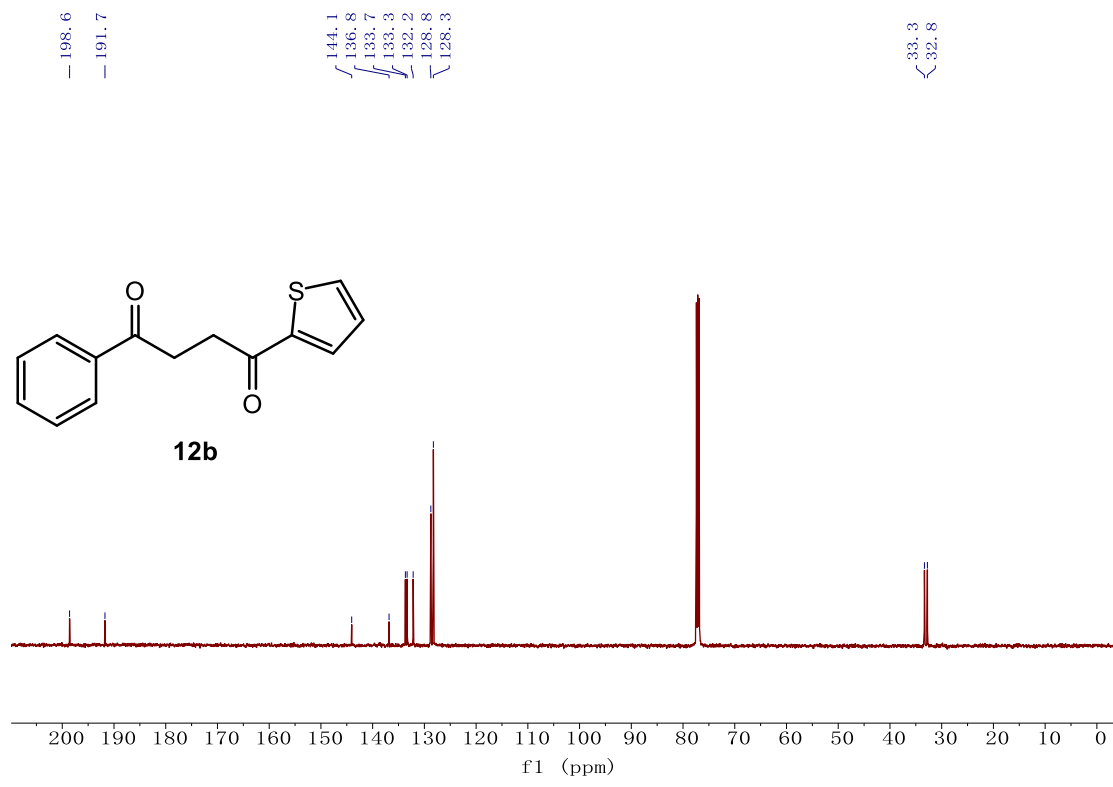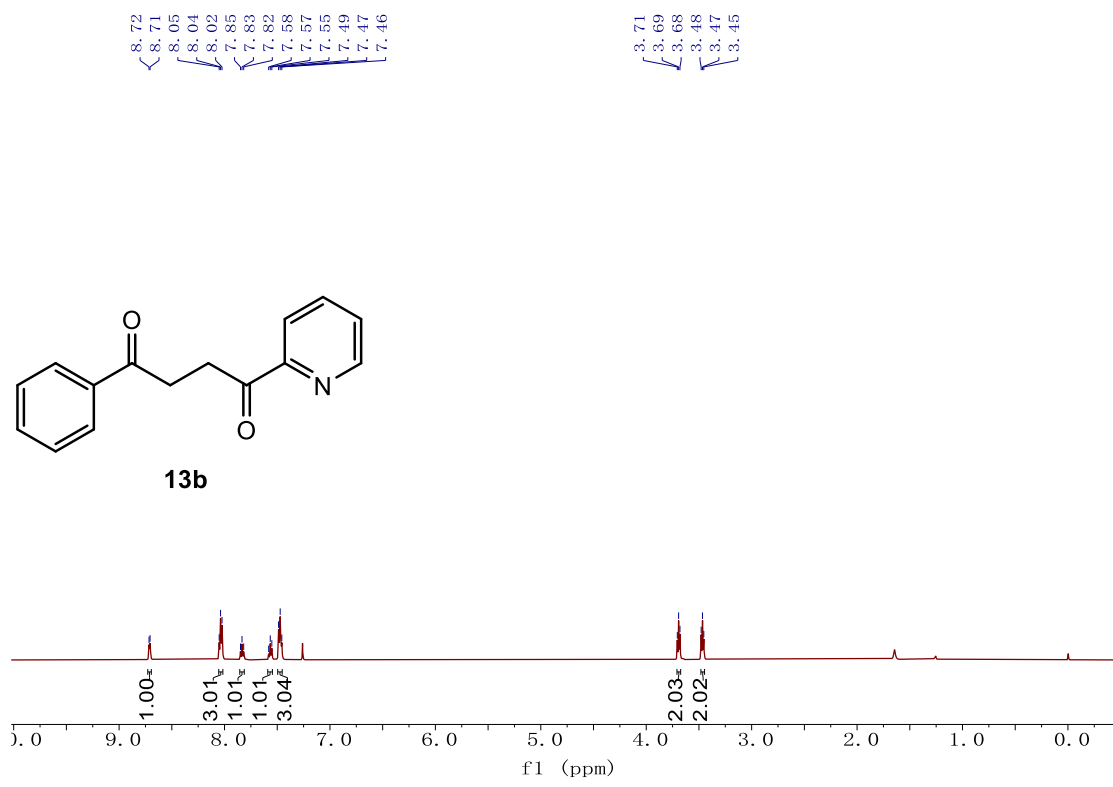

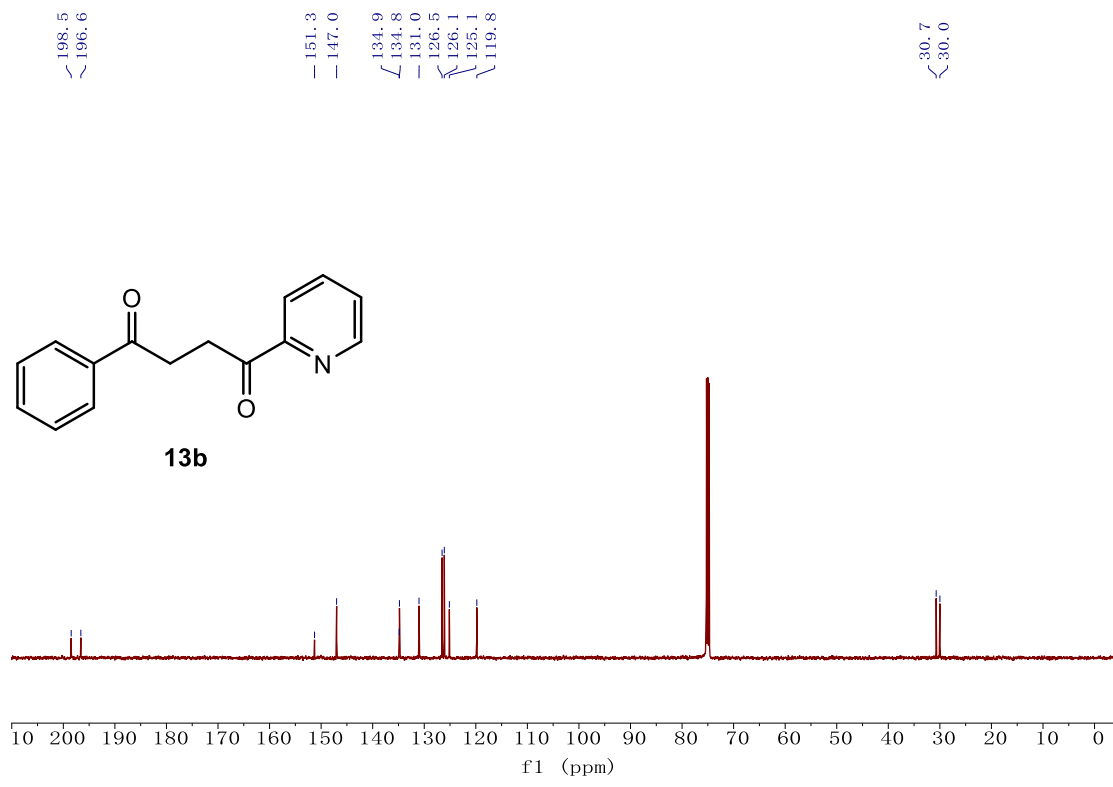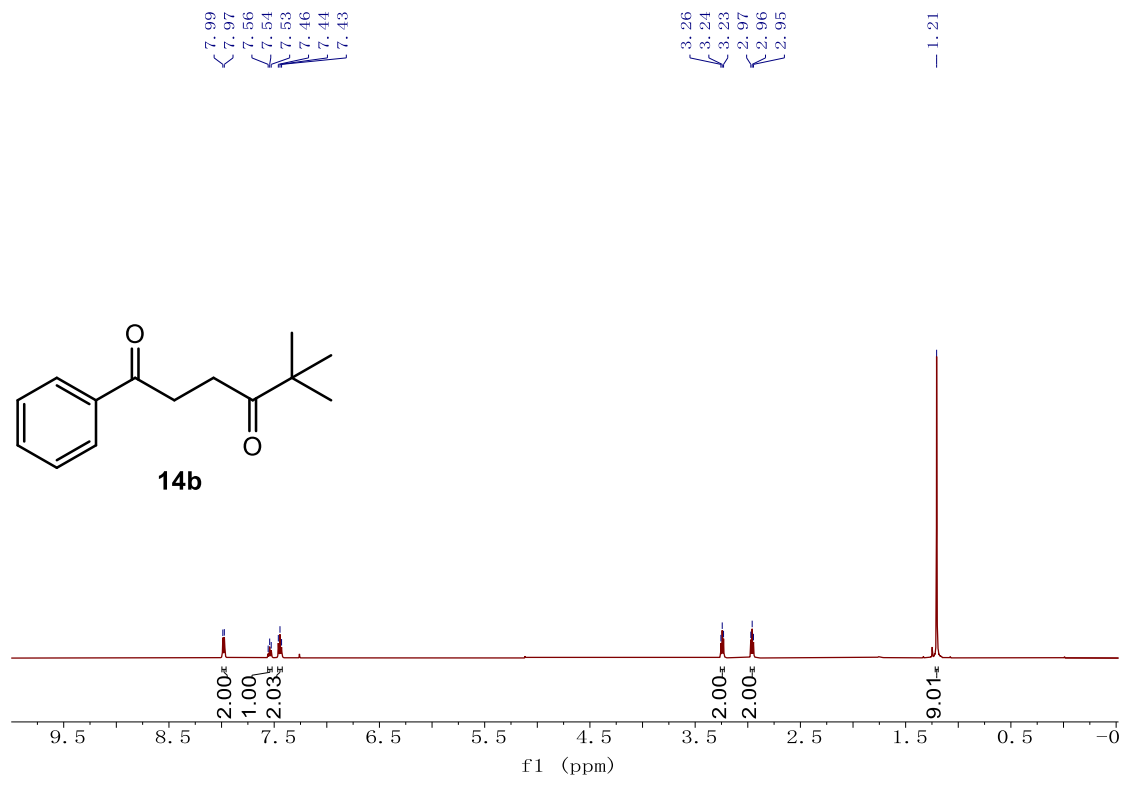

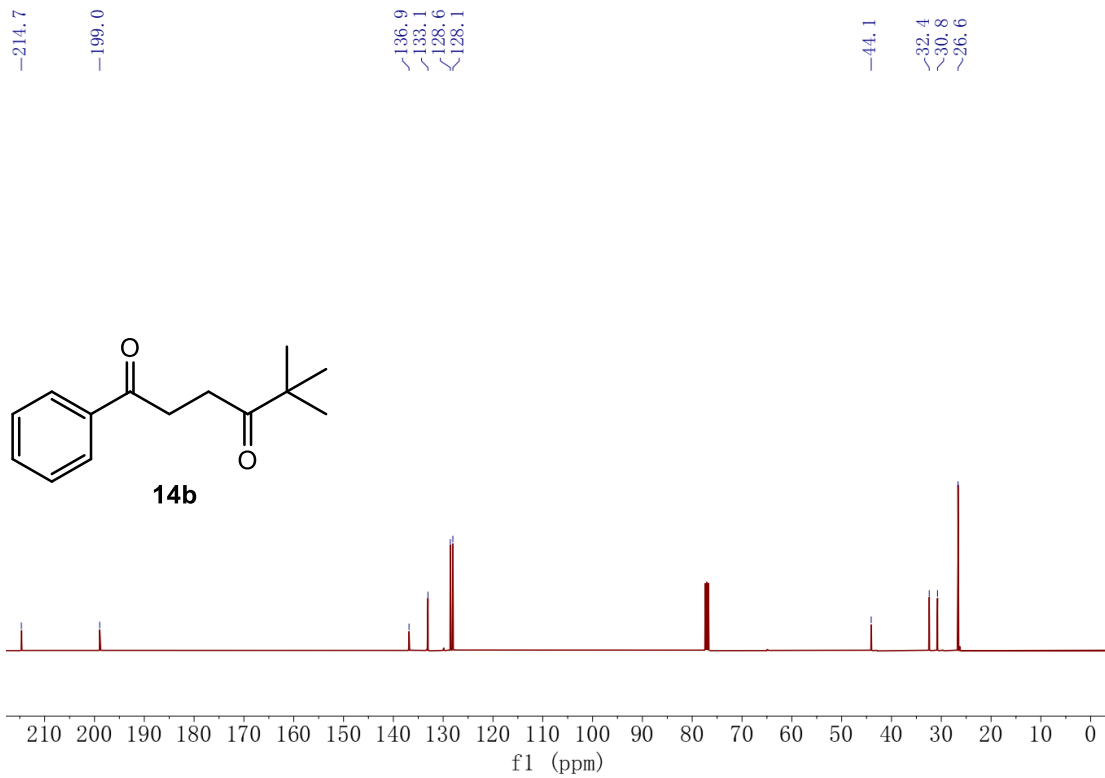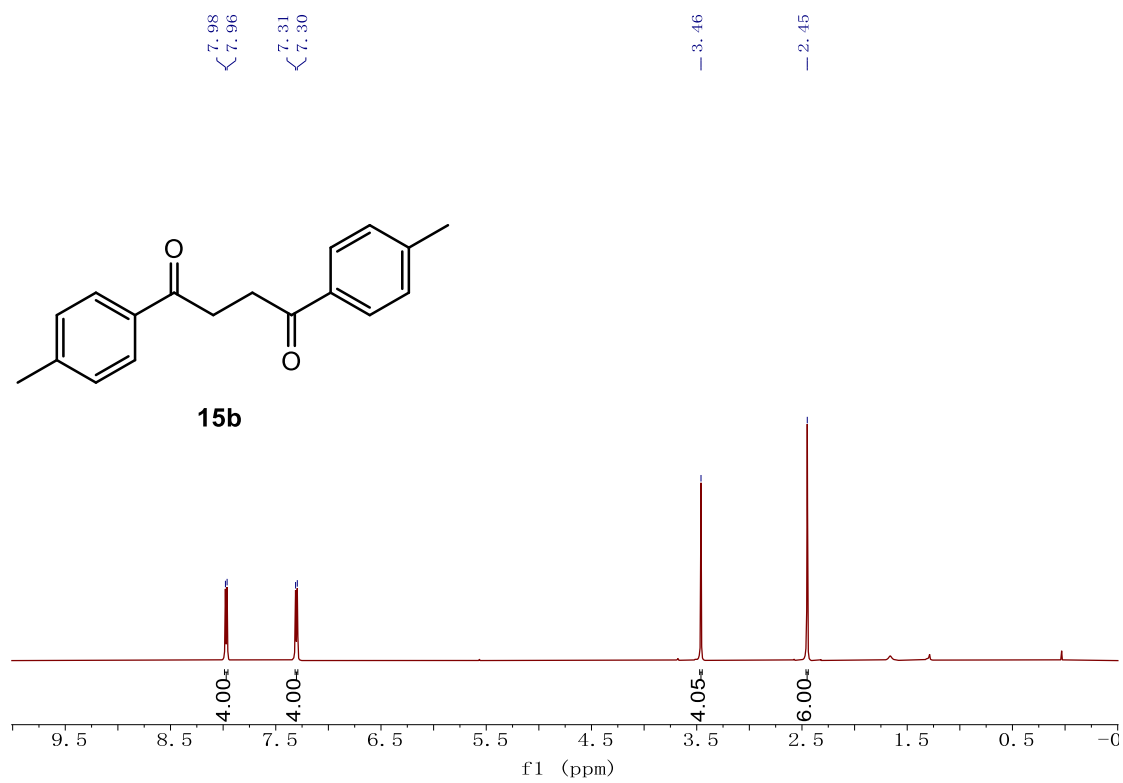

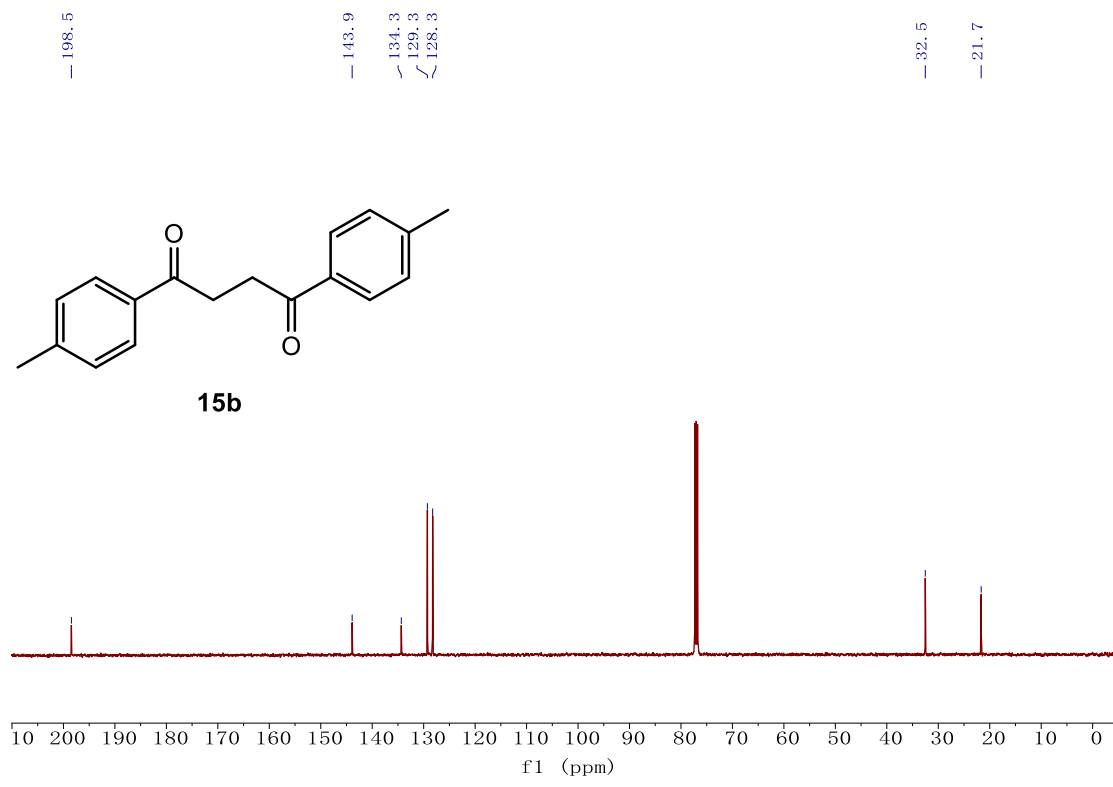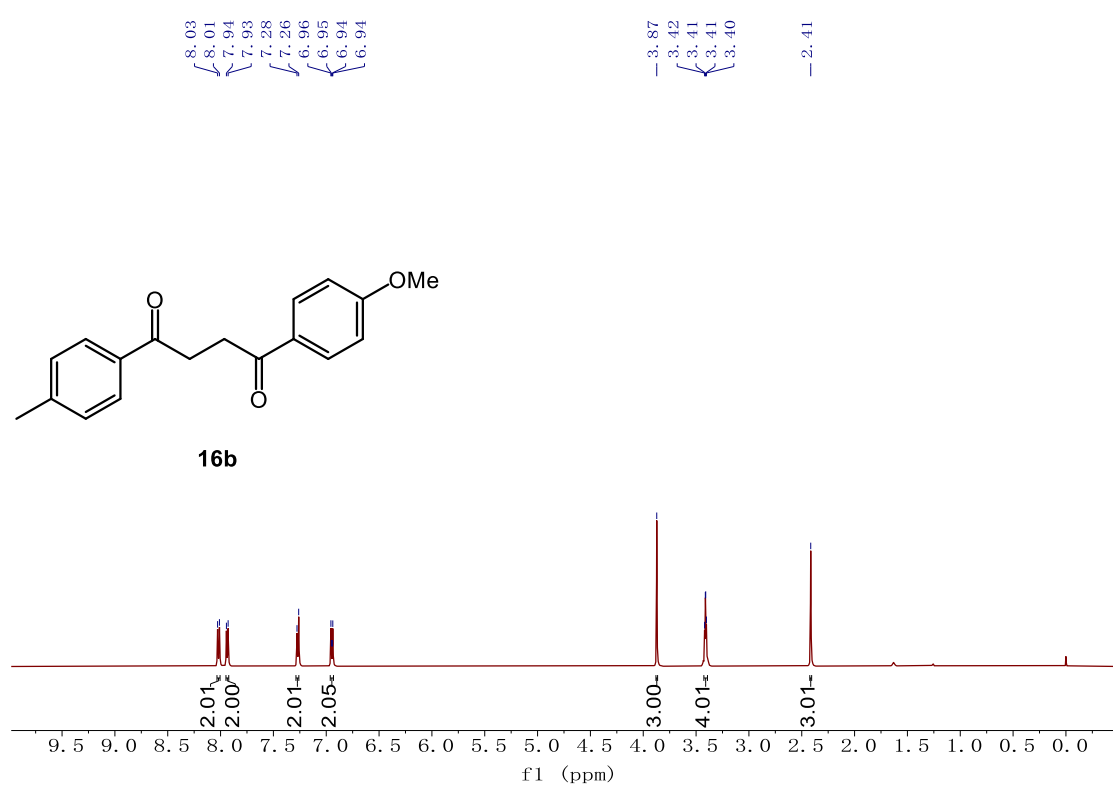

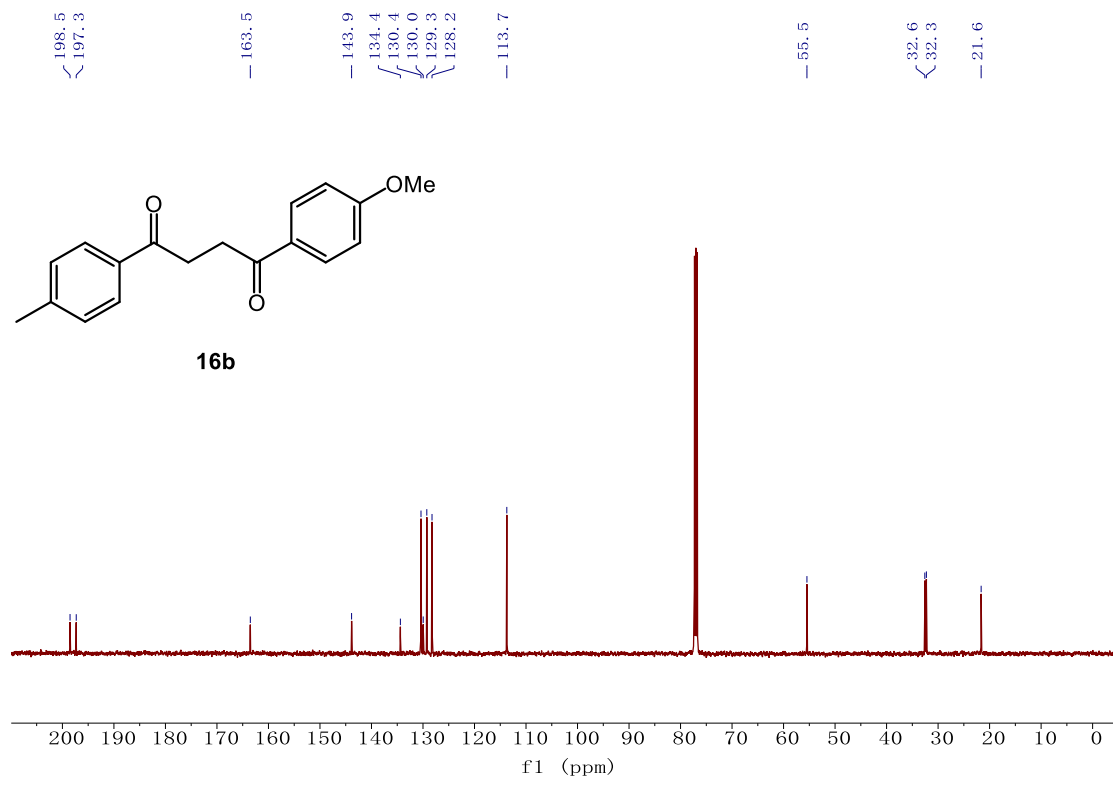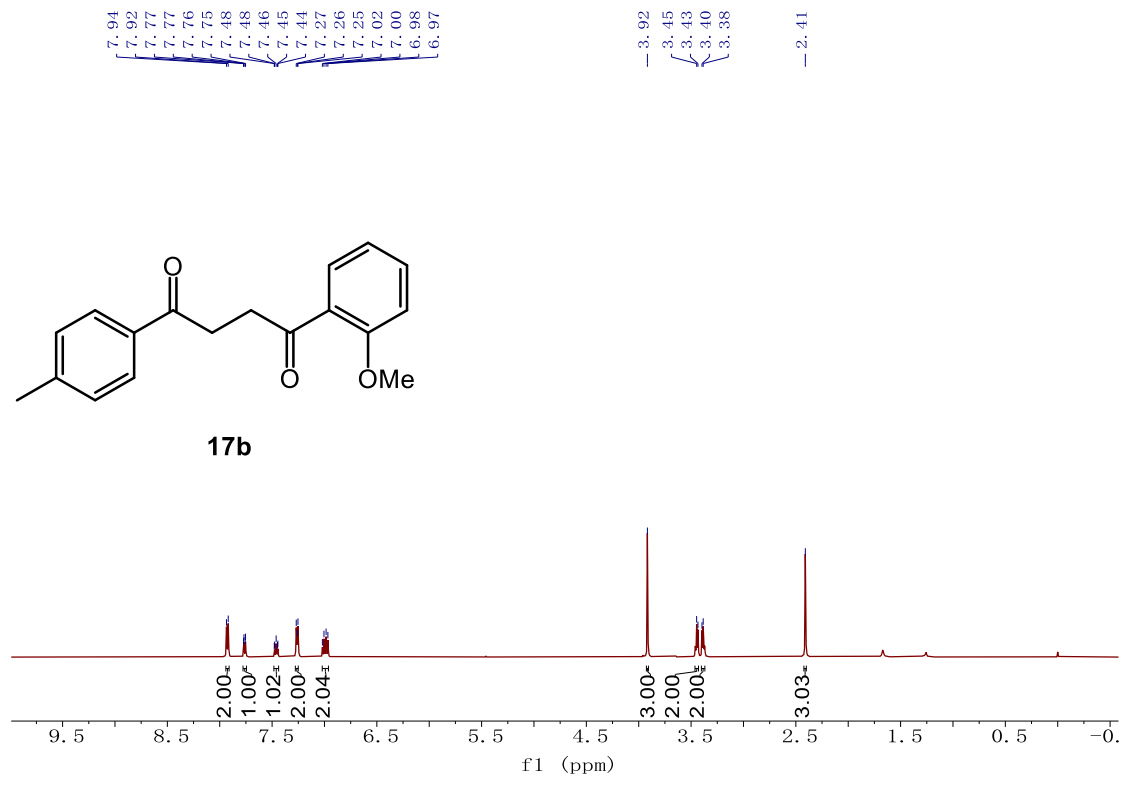

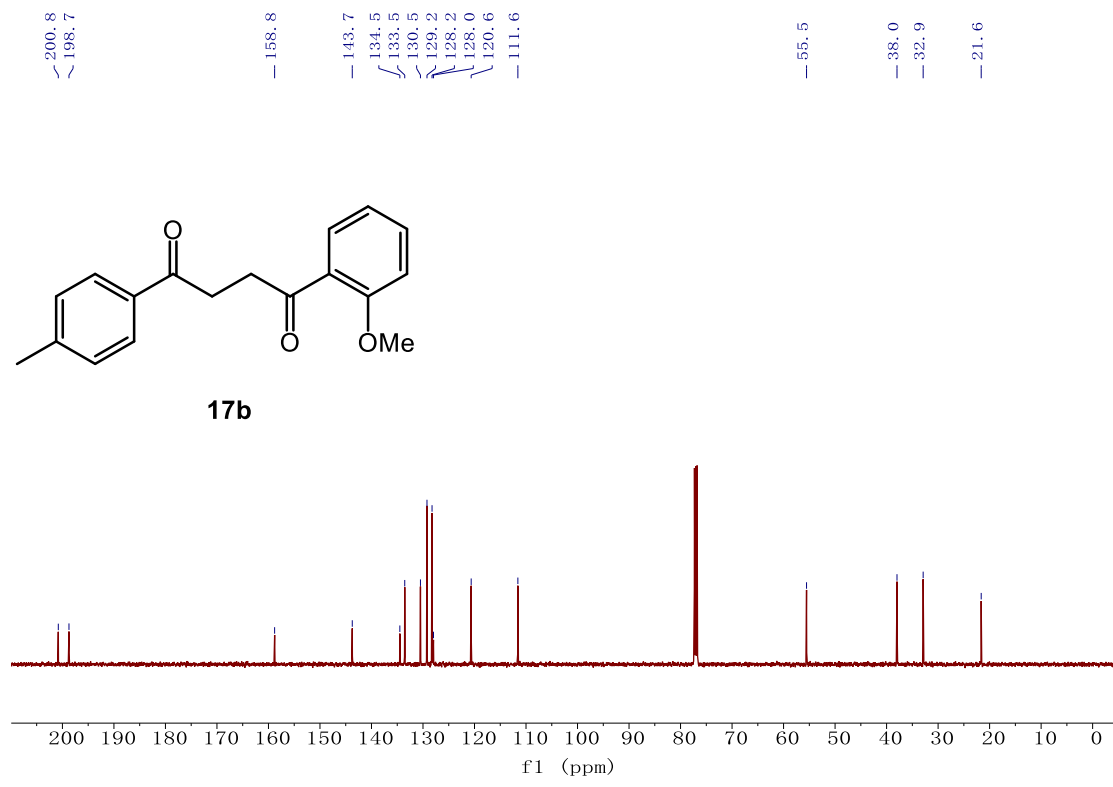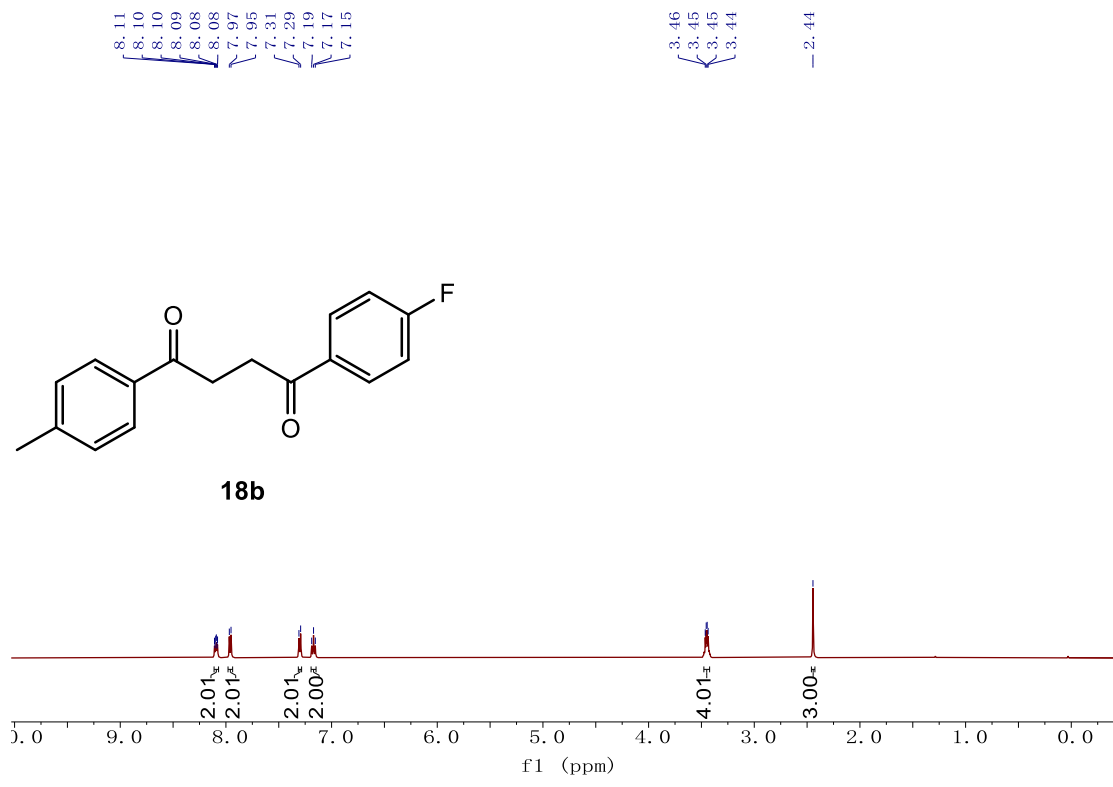



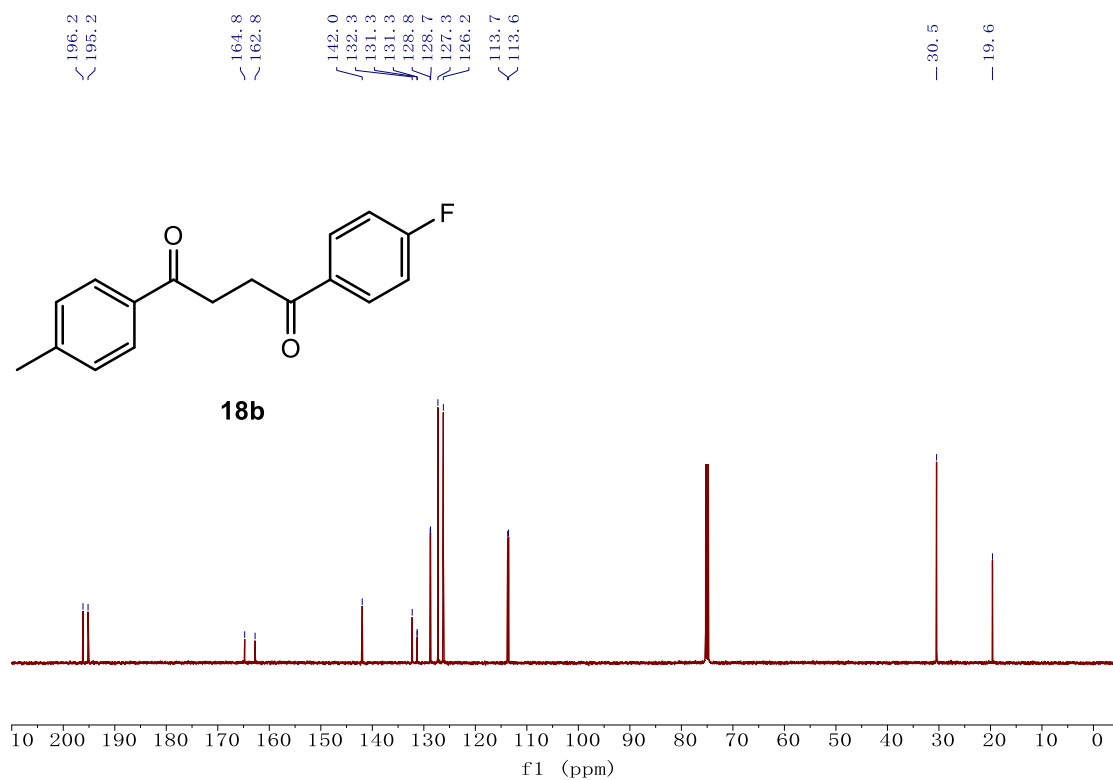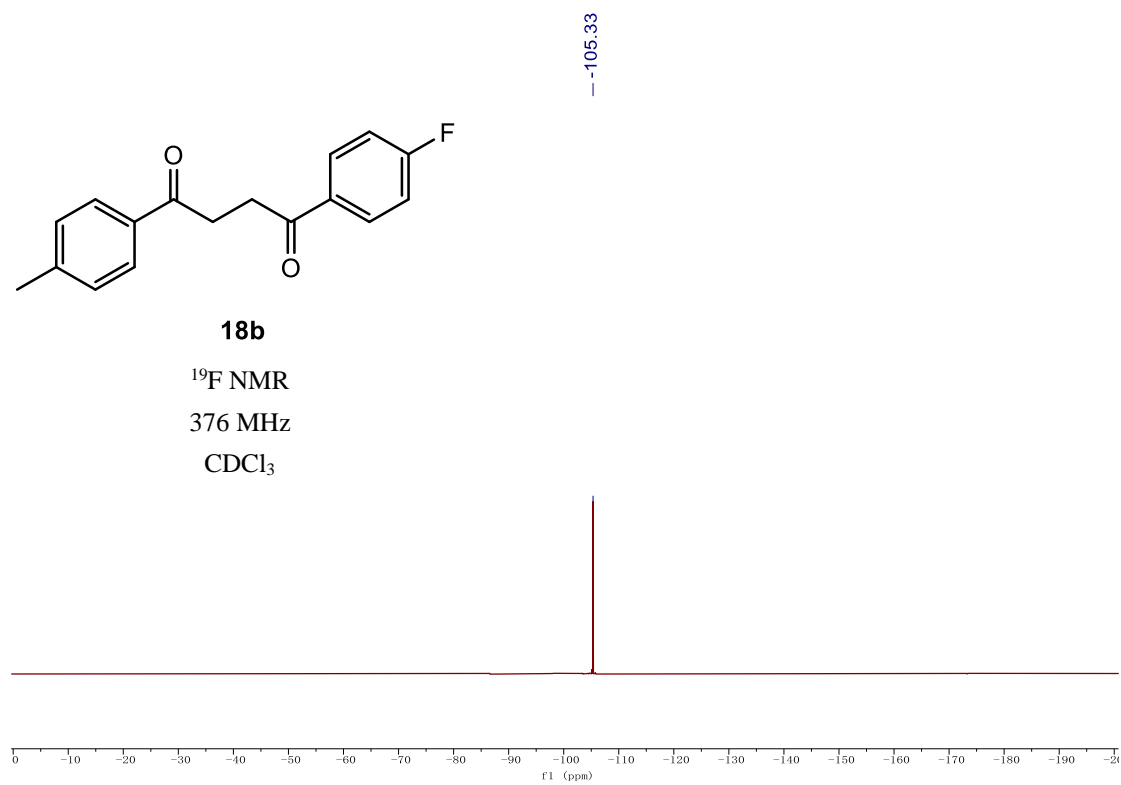

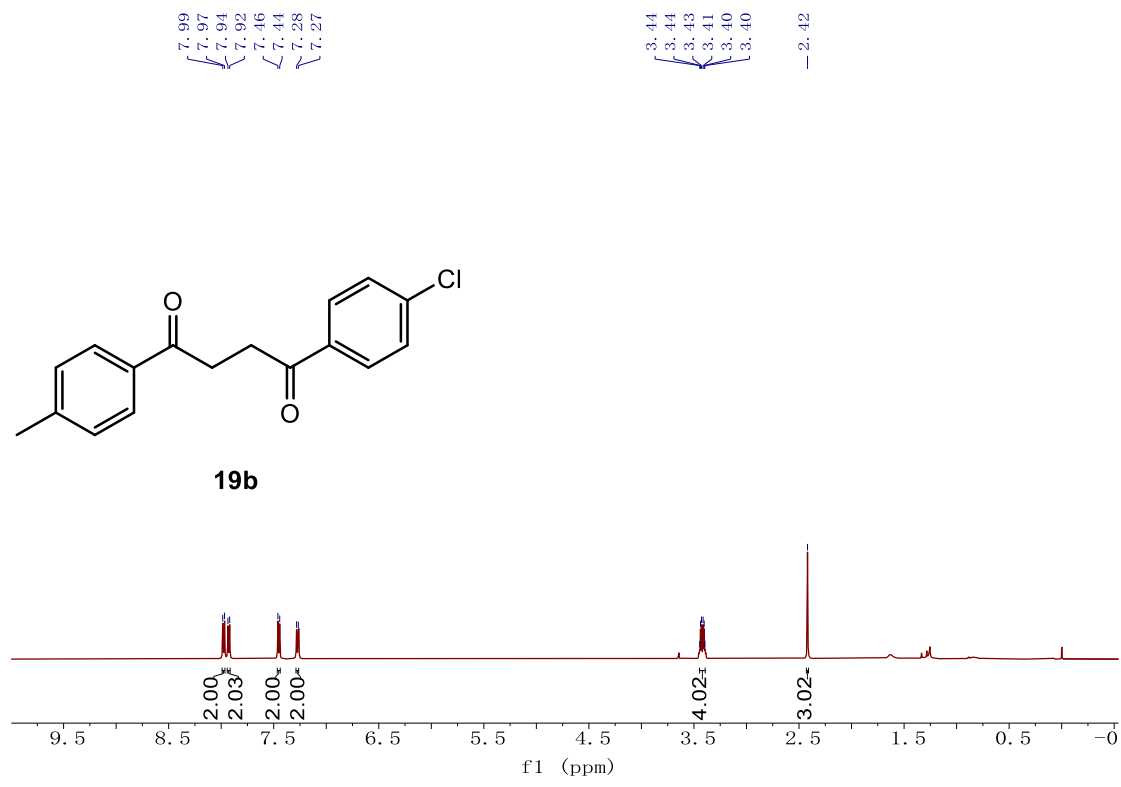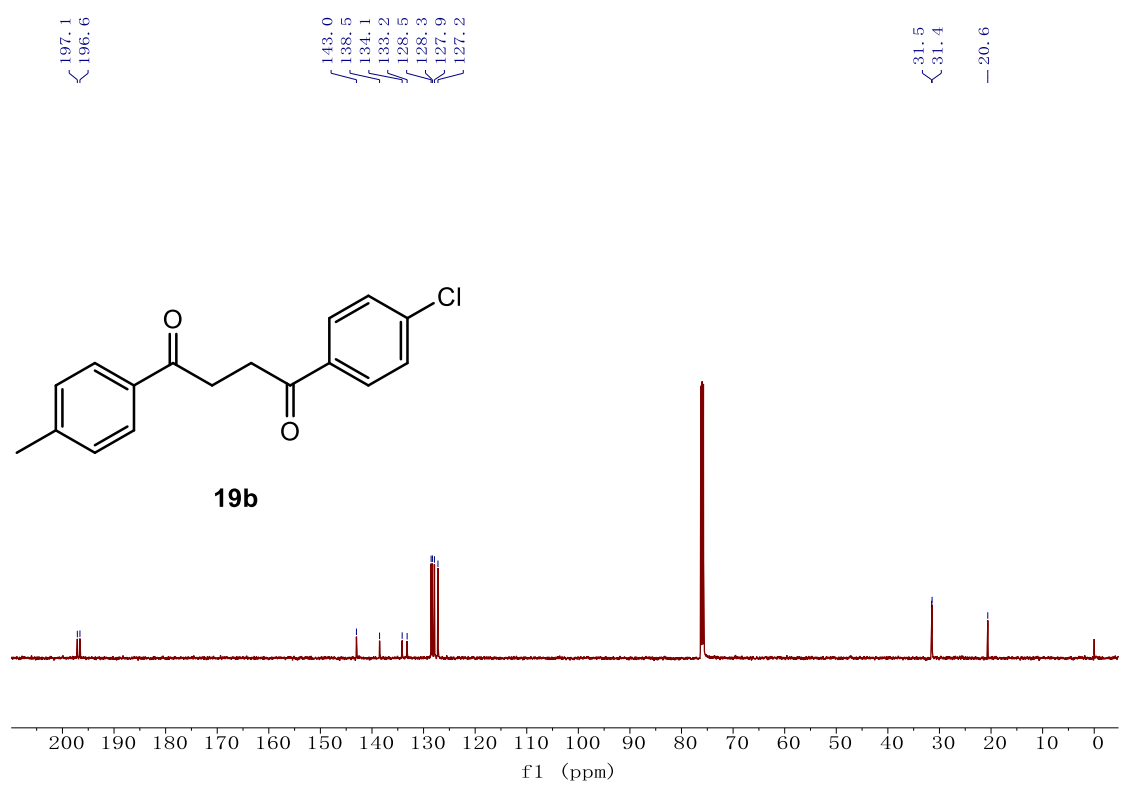

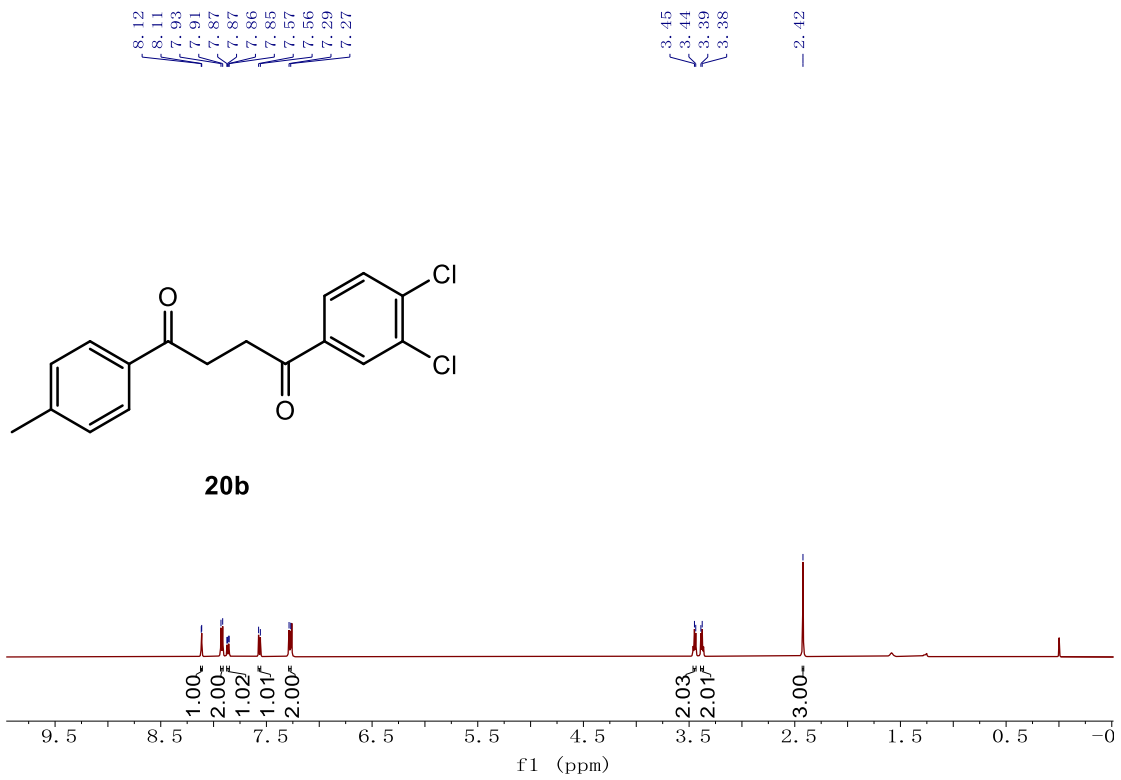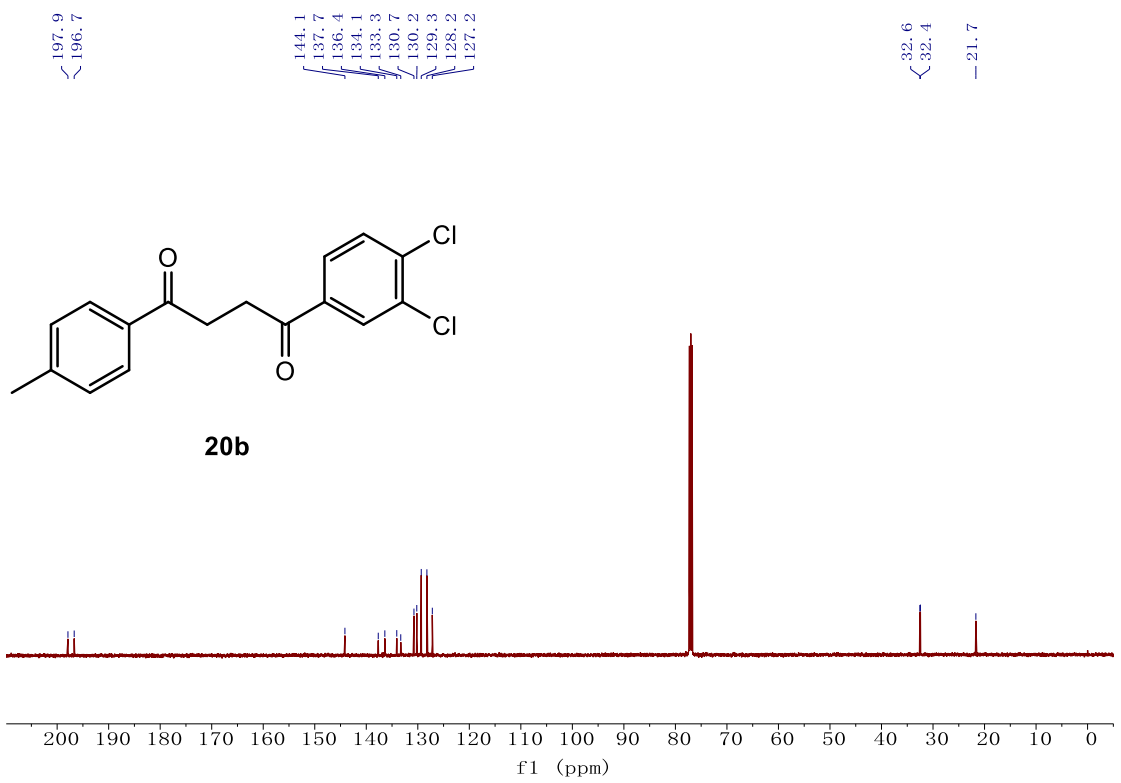

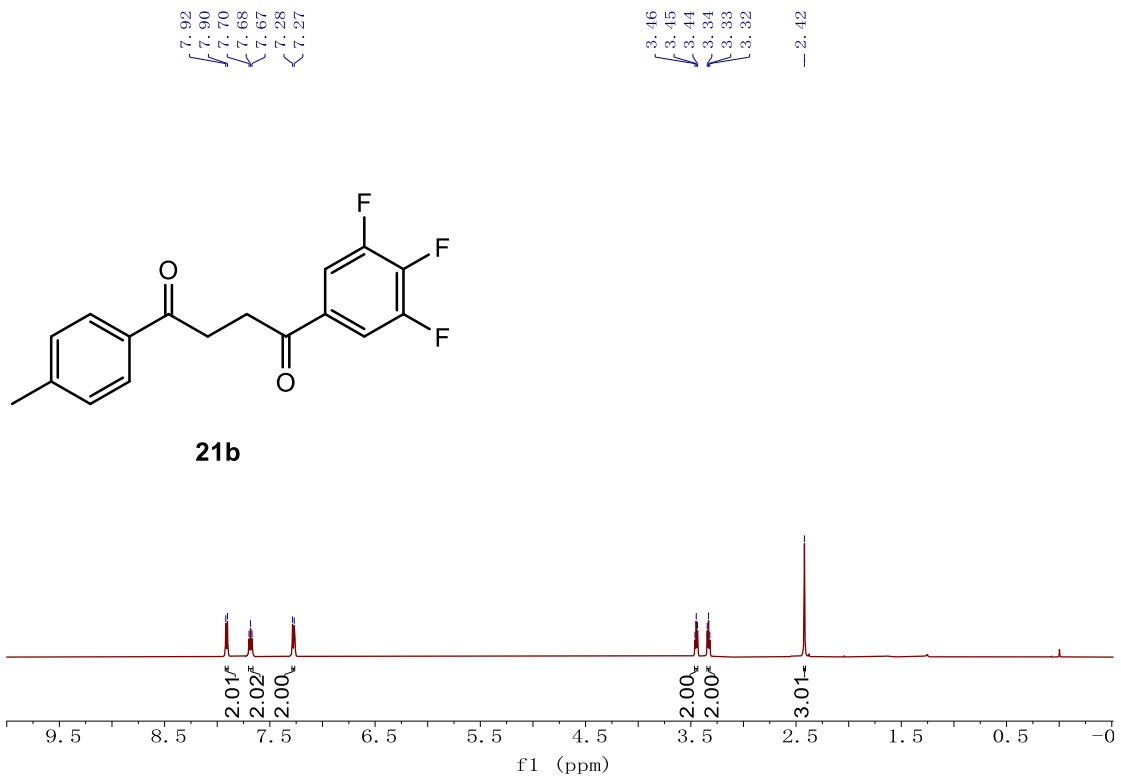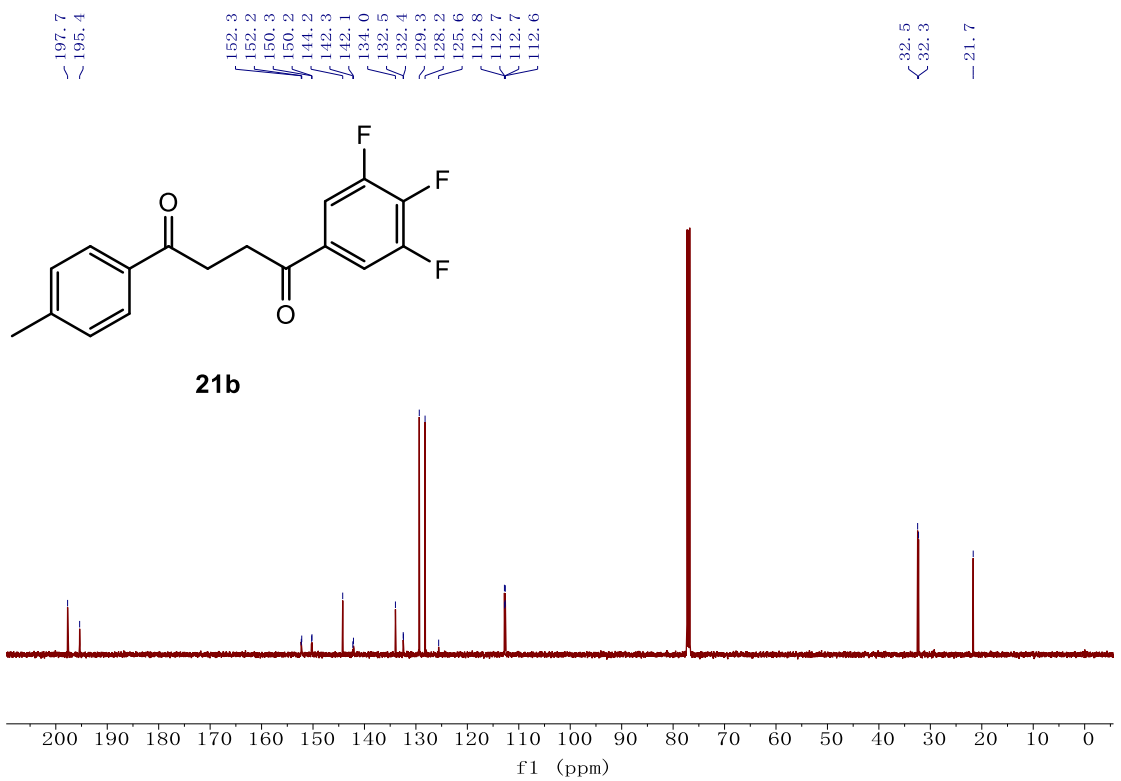

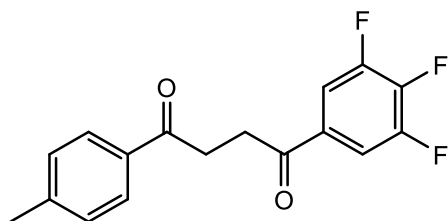

**21b**

$^{19}\text{F}$  NMR  
376 MHz  
 $\text{CDCl}_3$

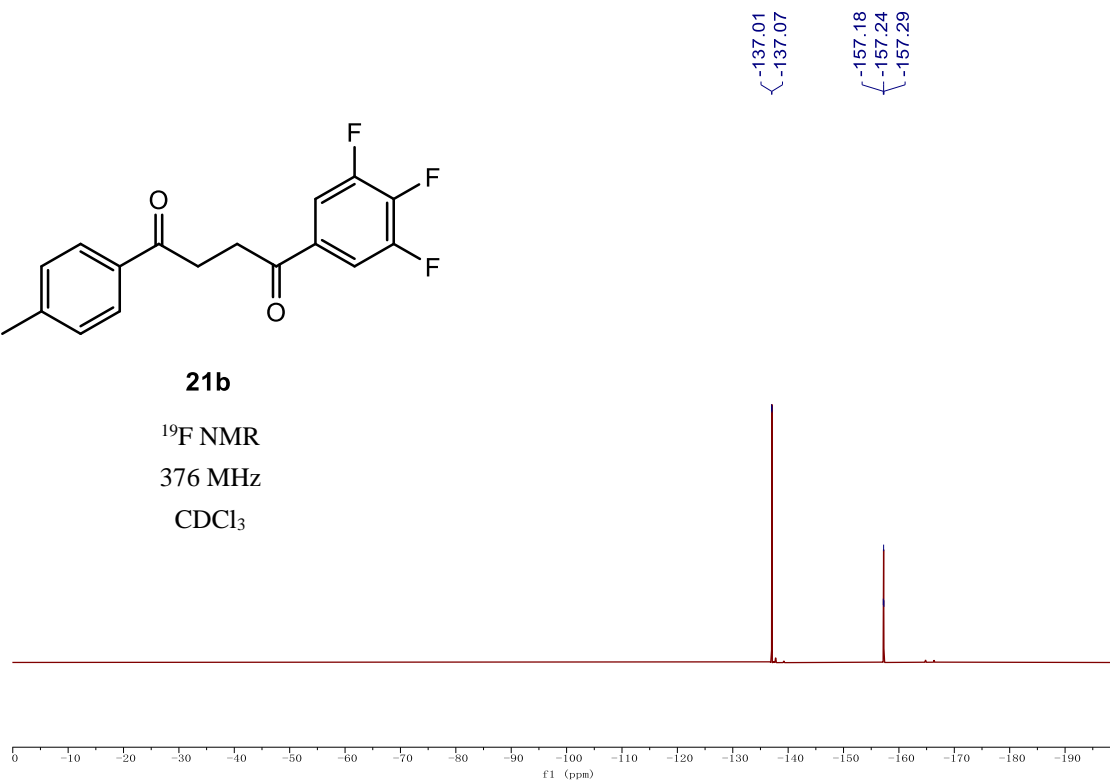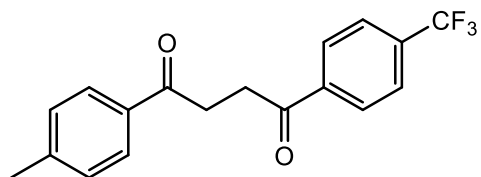

**22b**

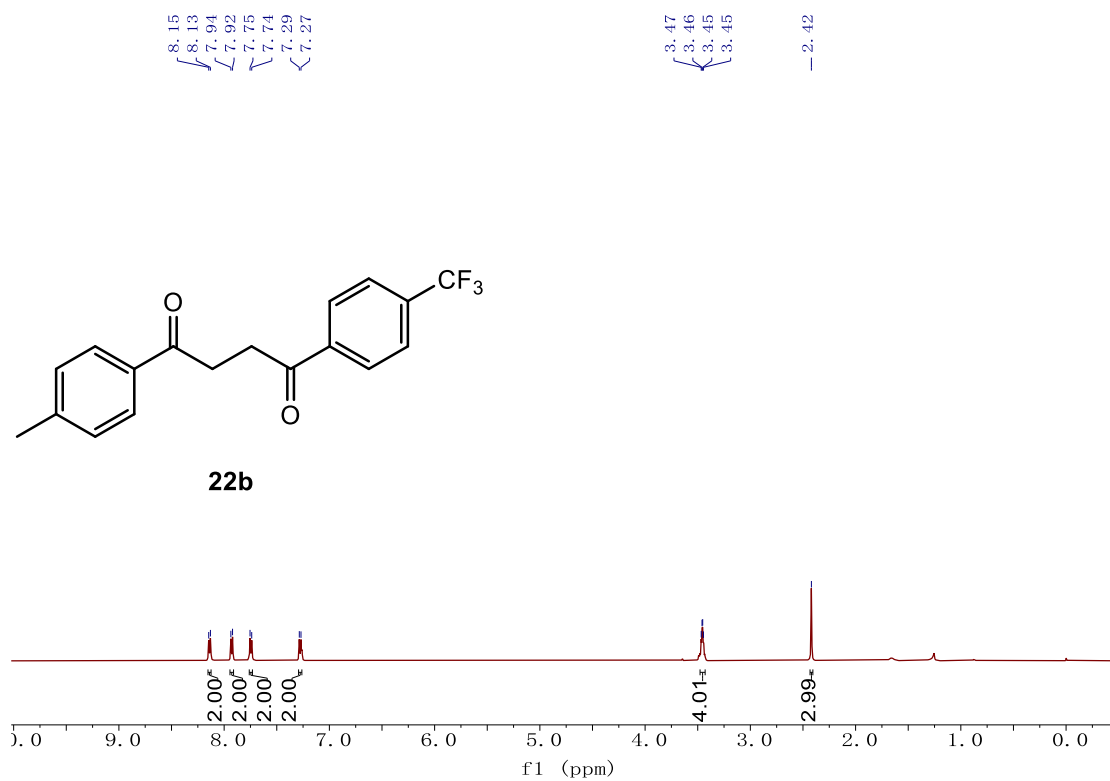

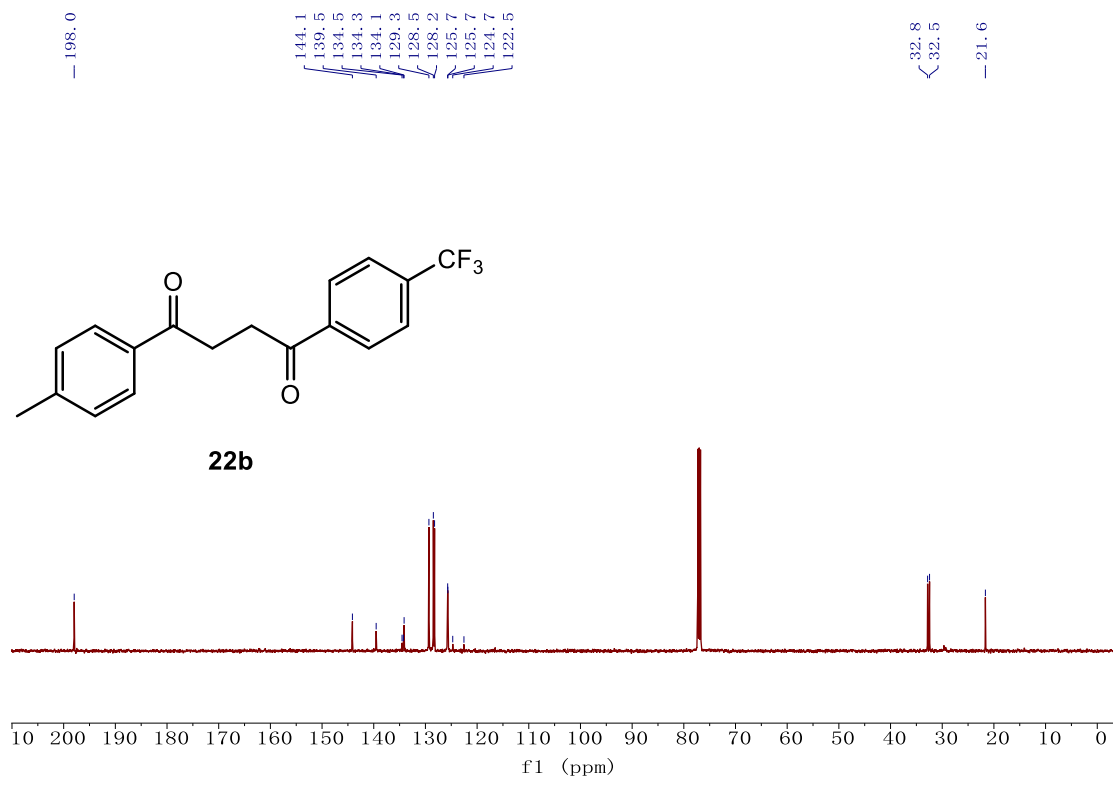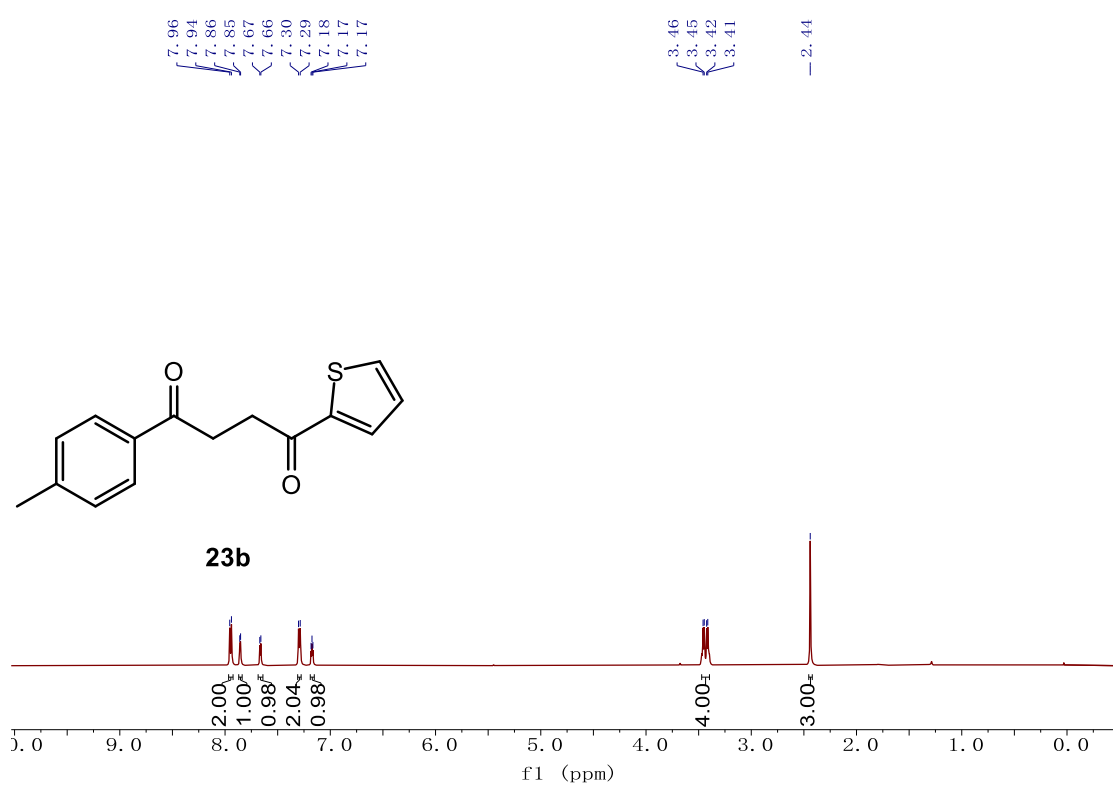

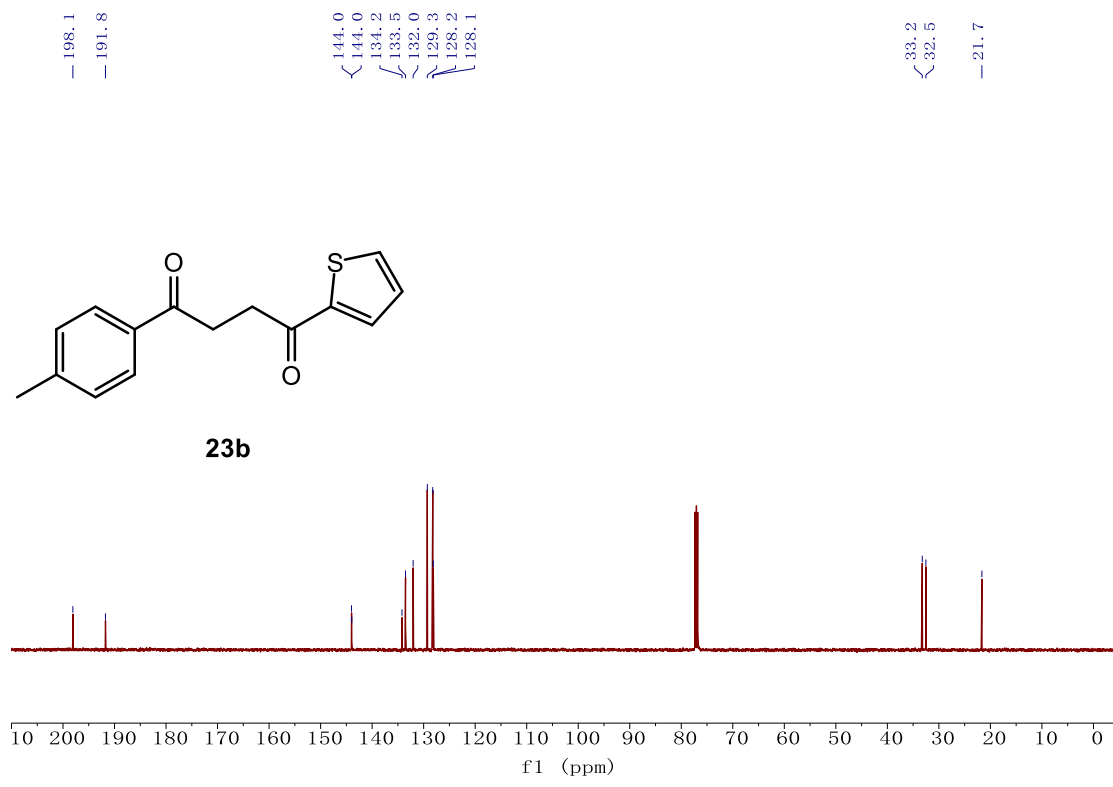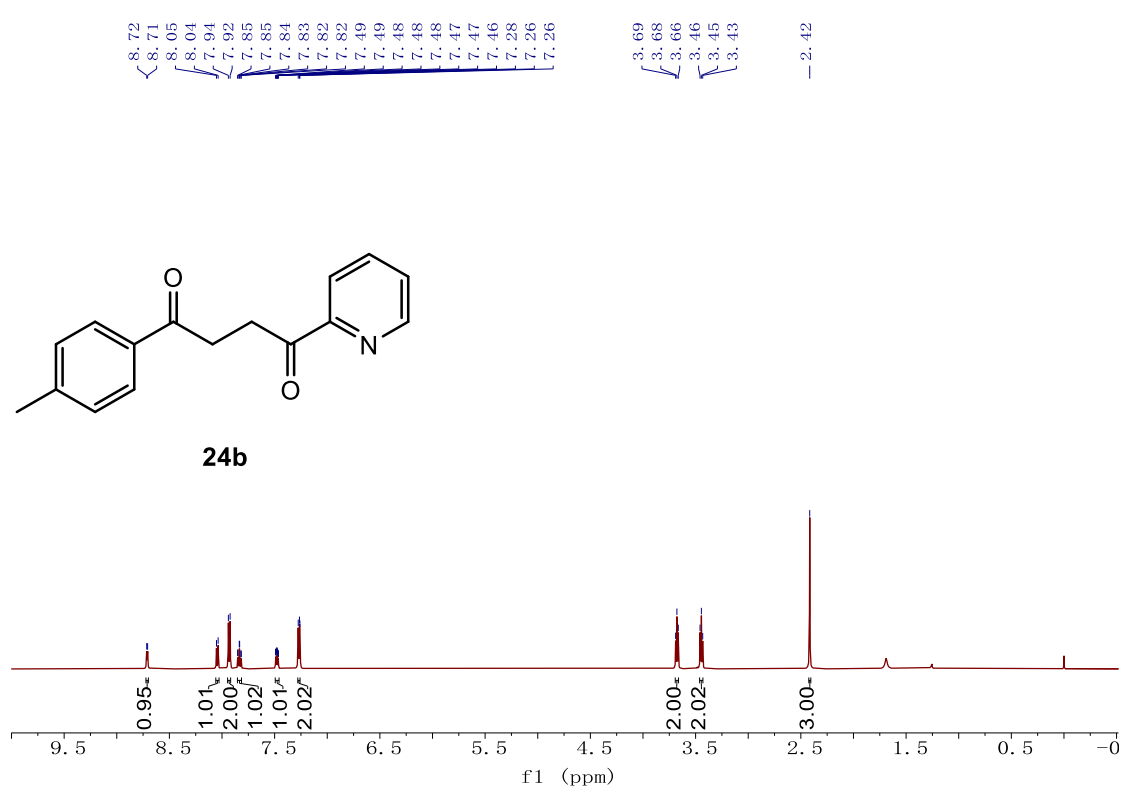

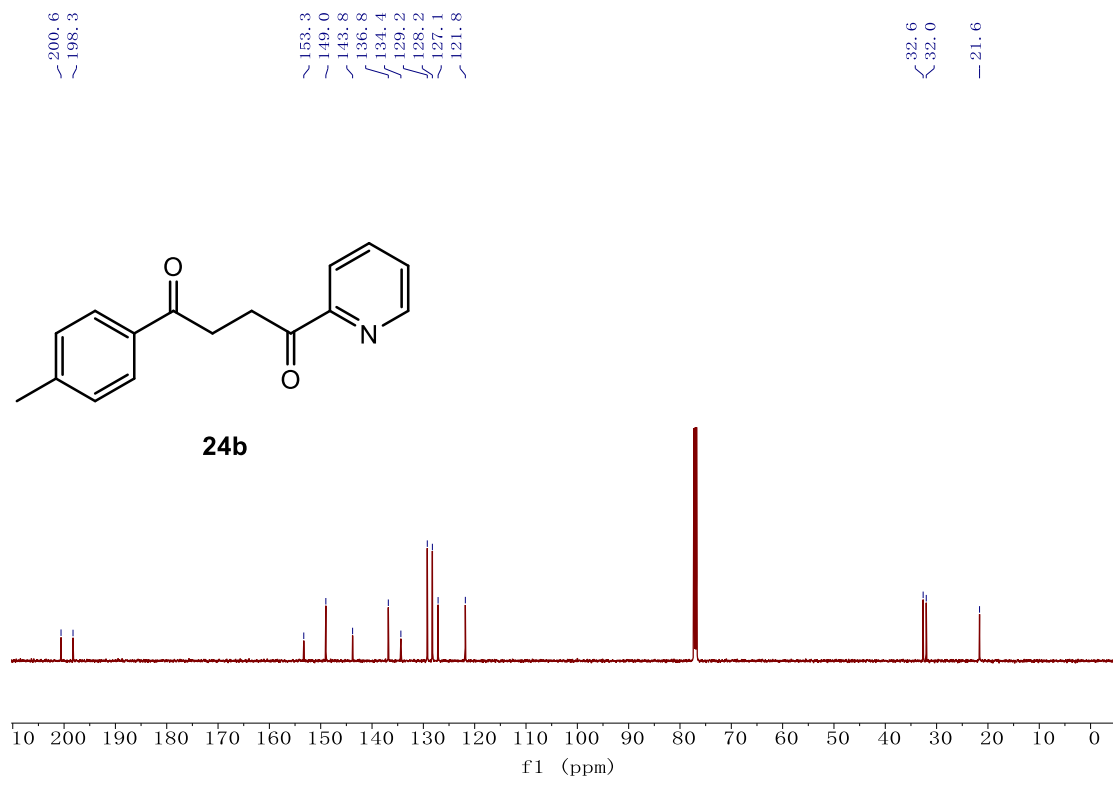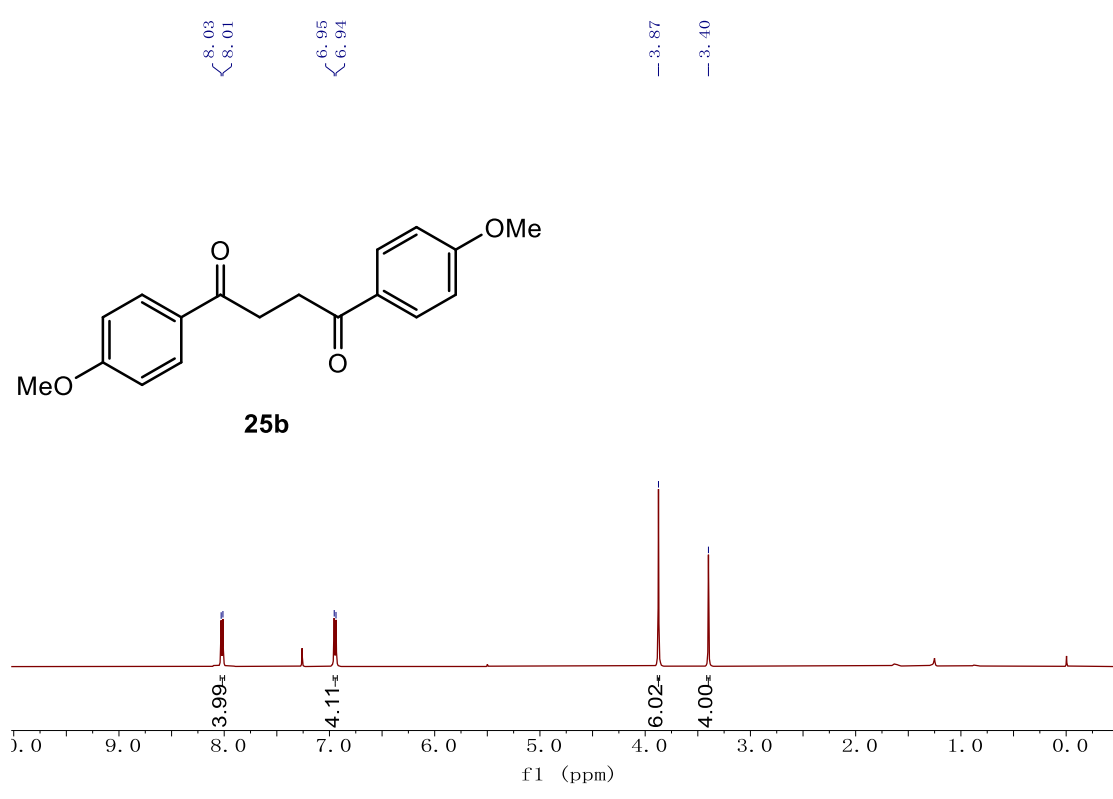



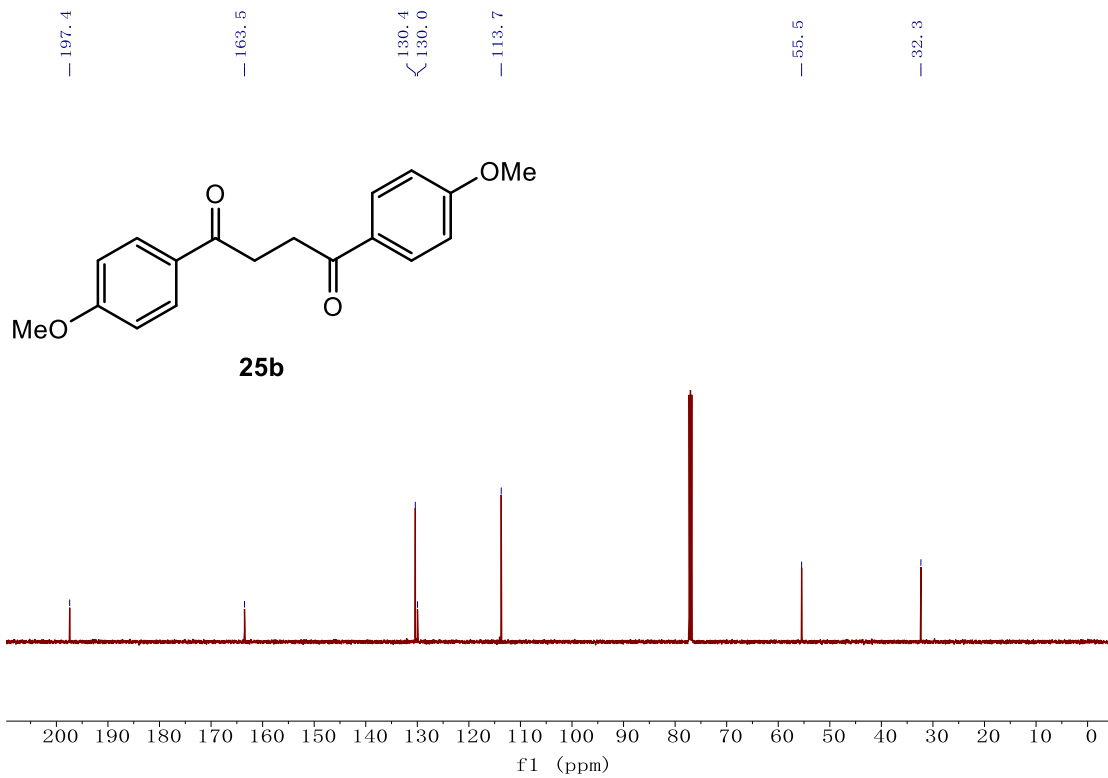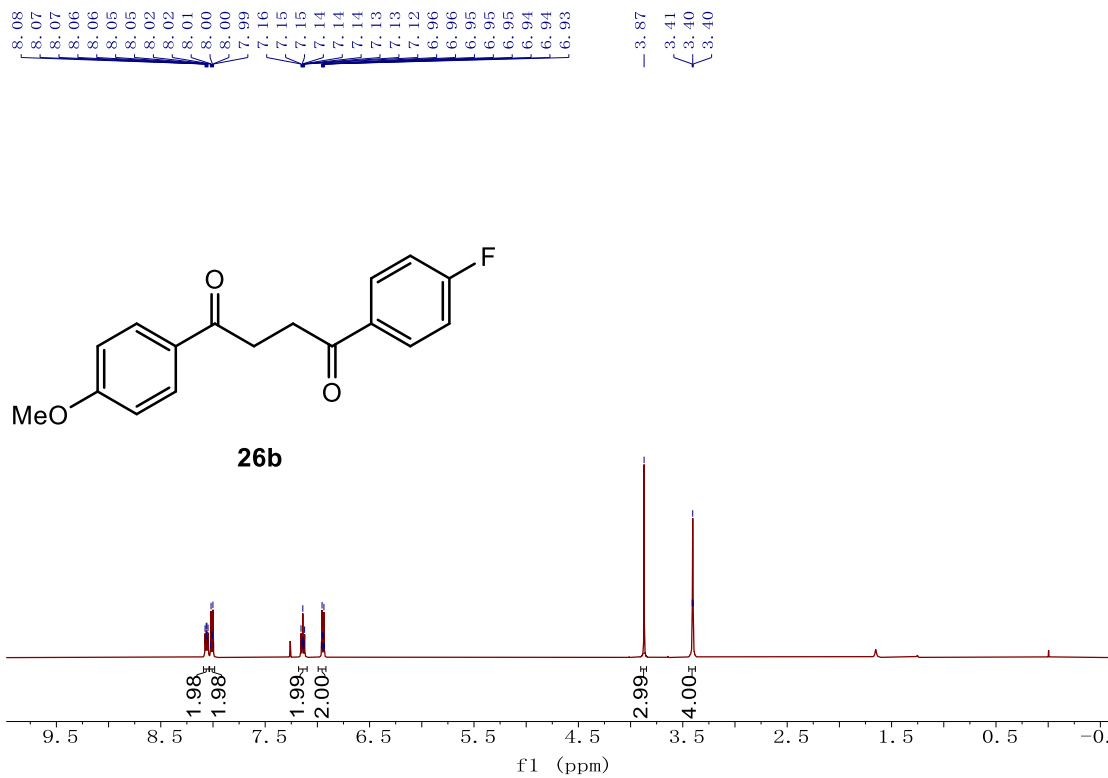

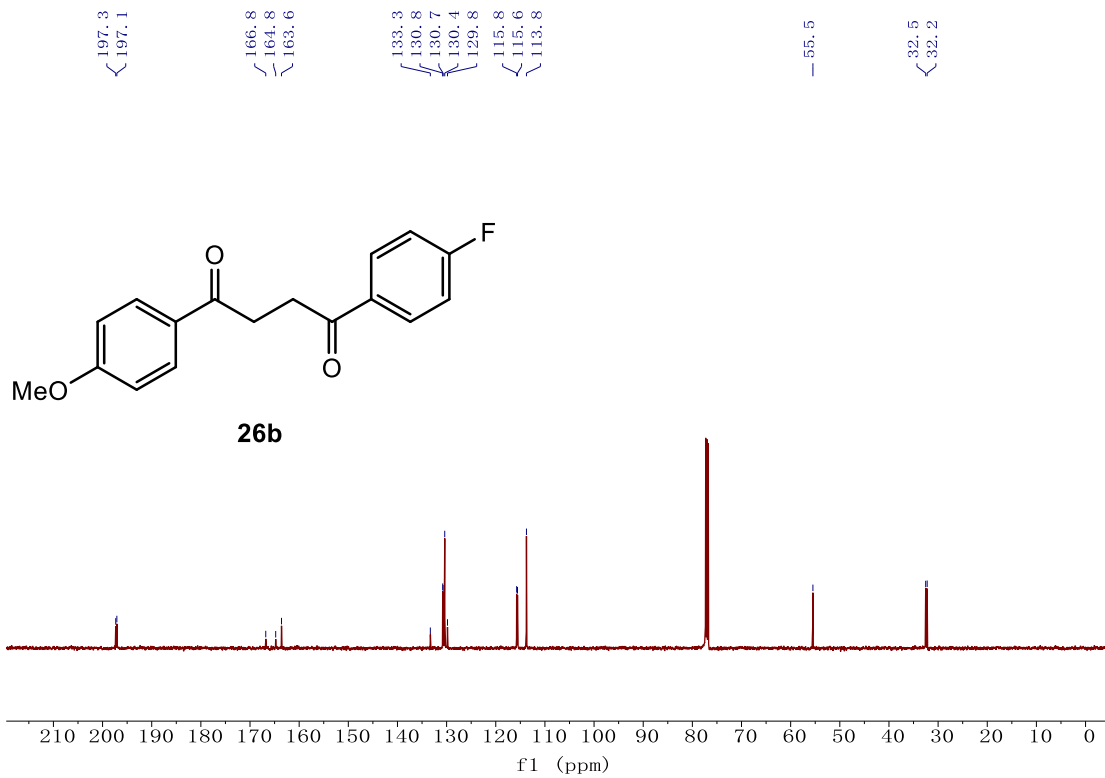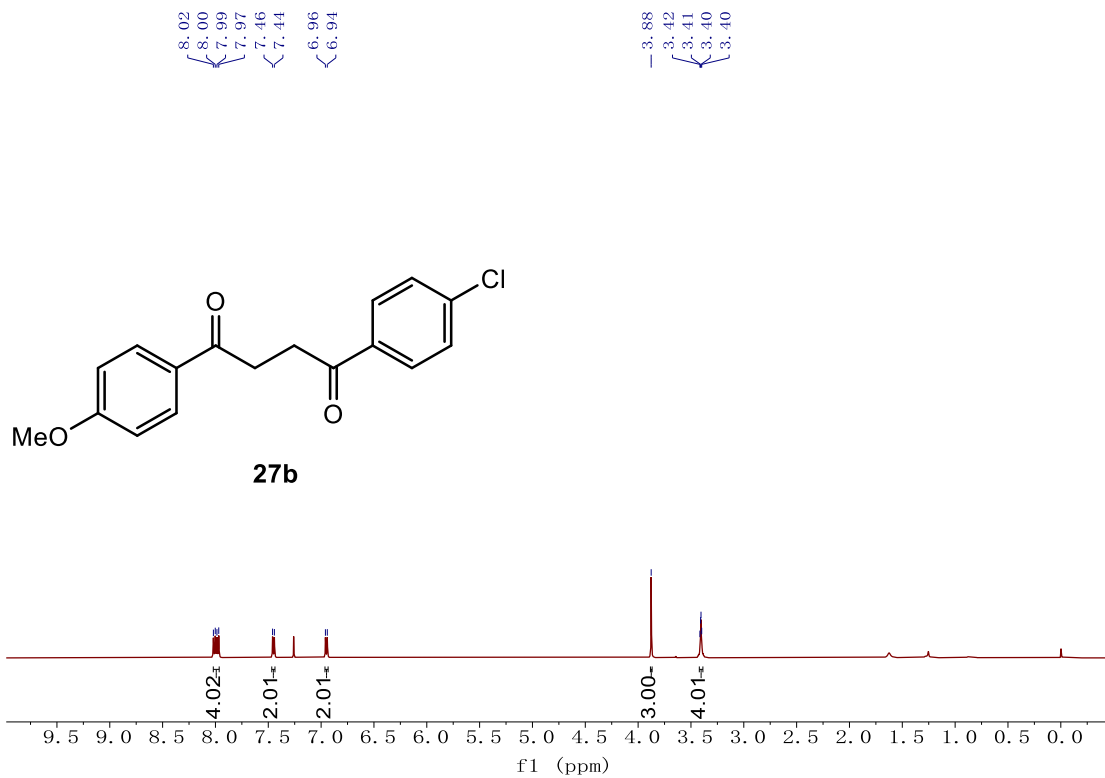

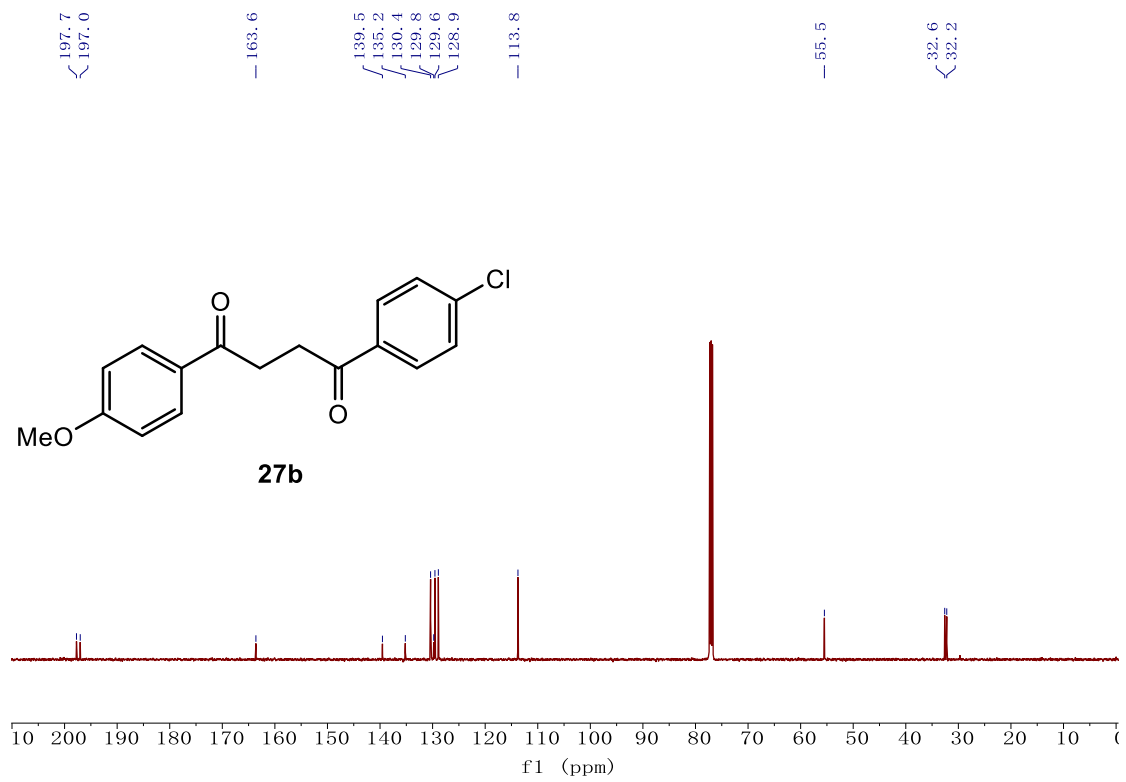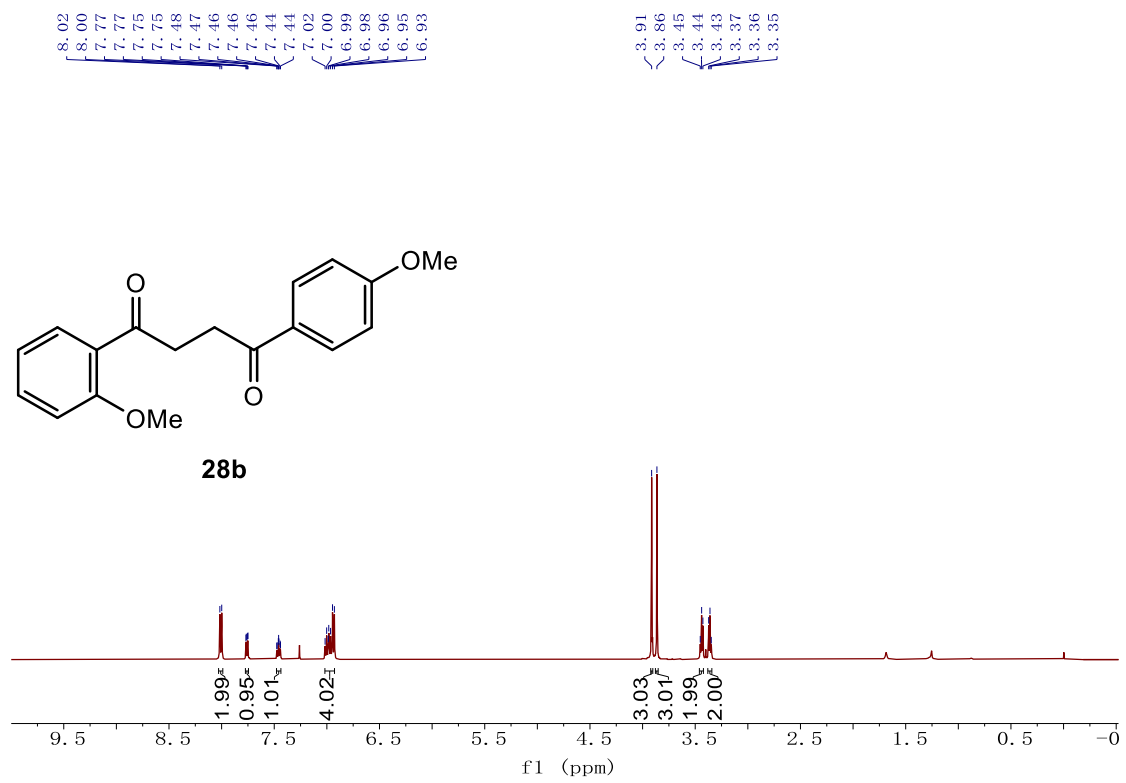

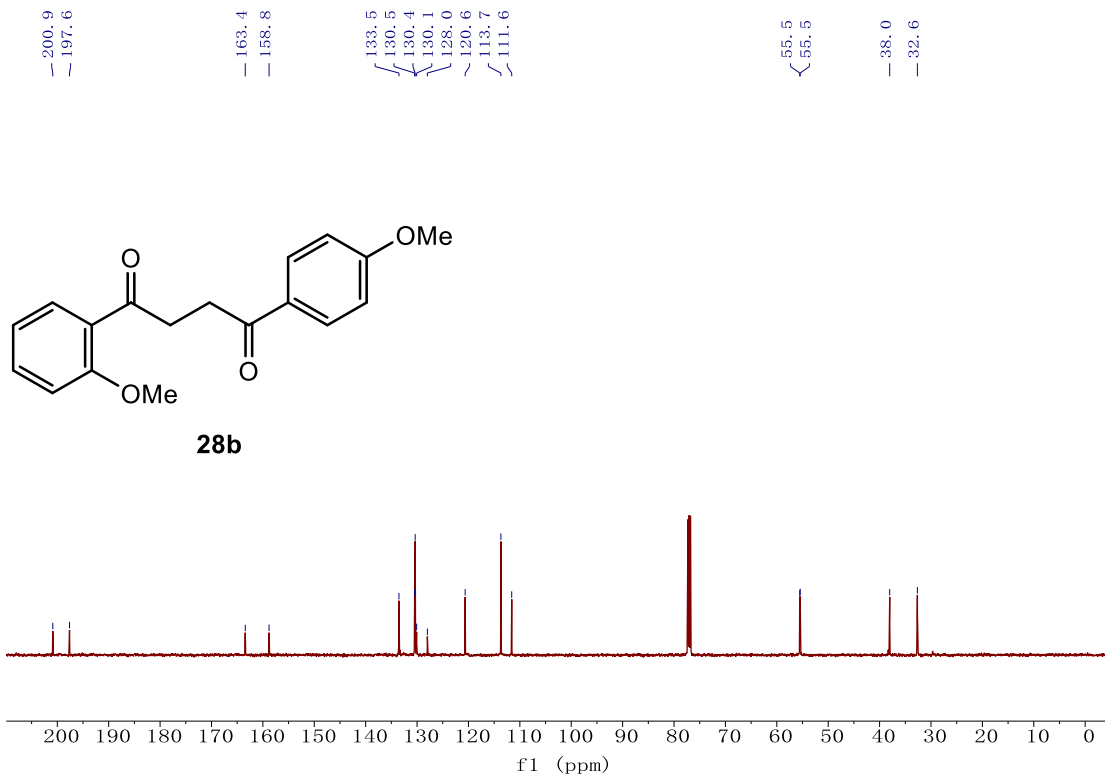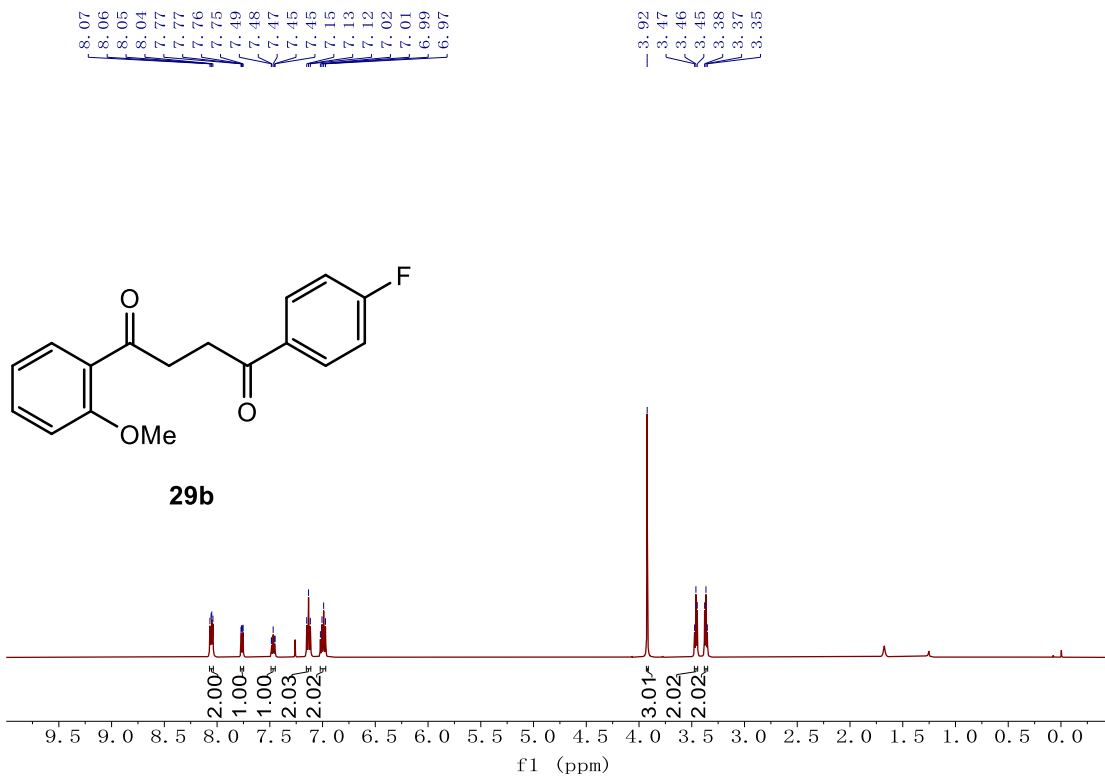

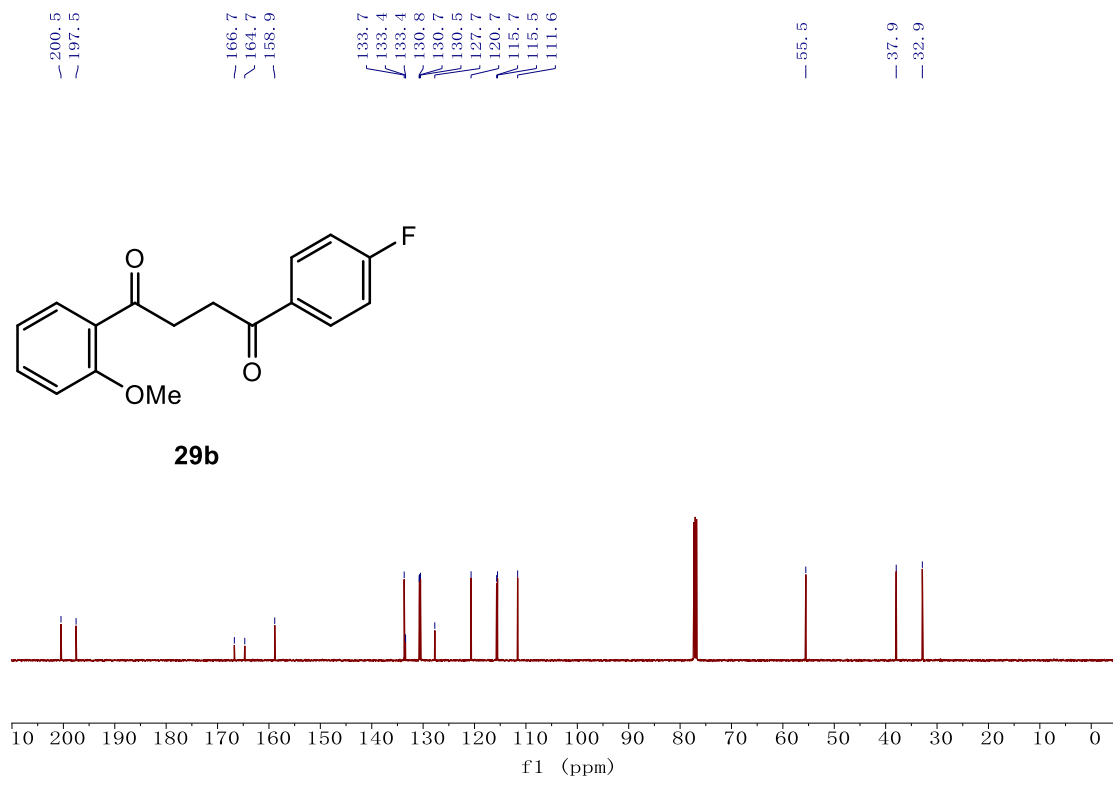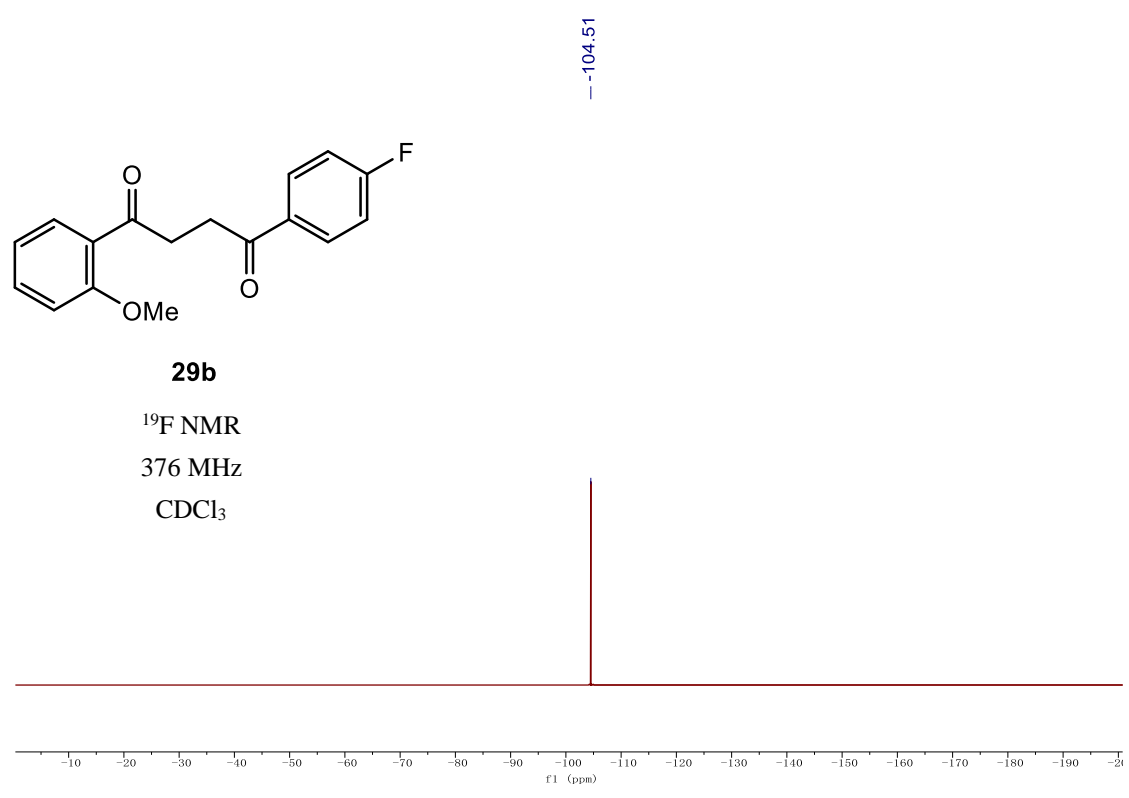

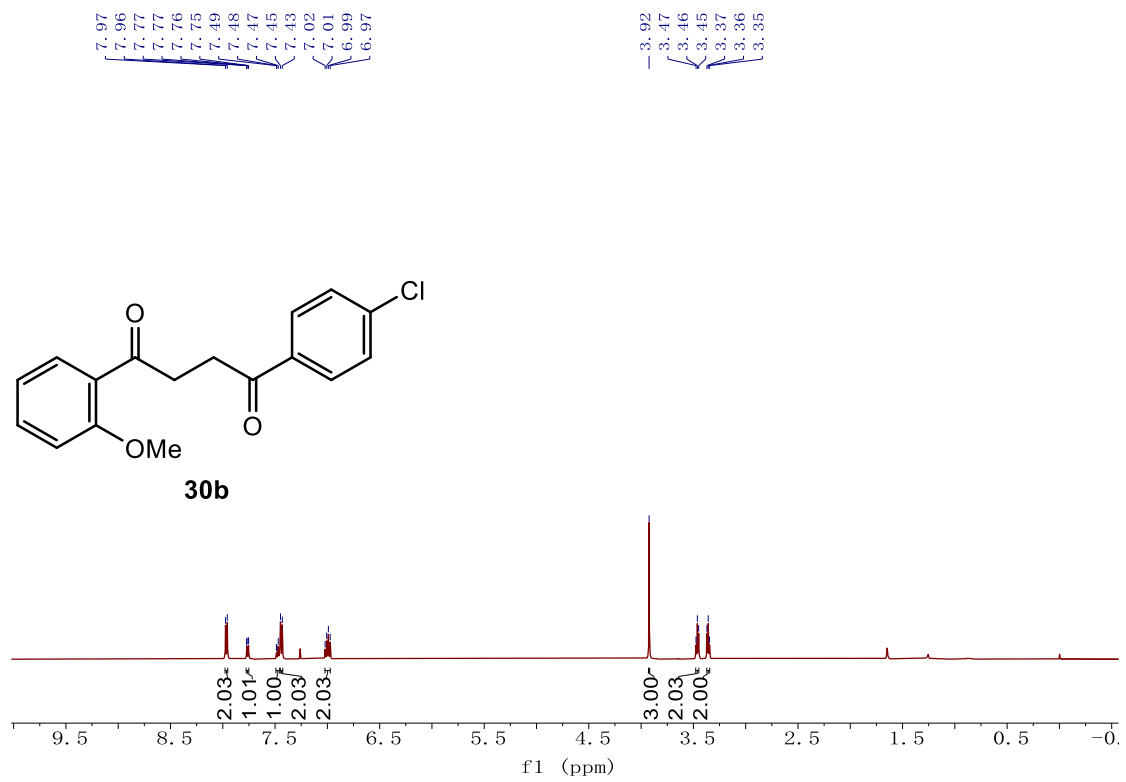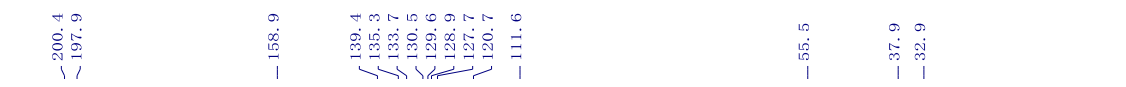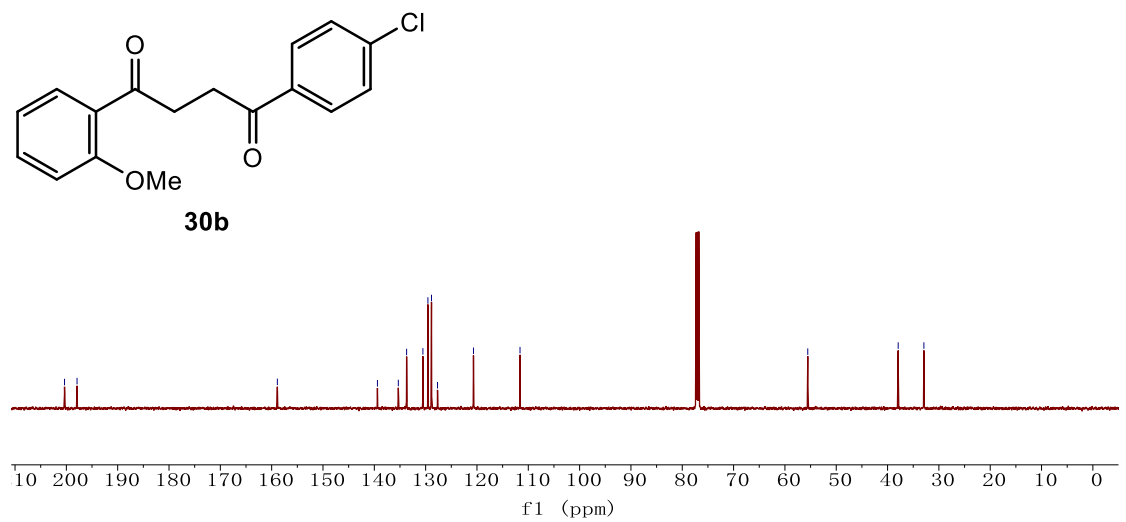

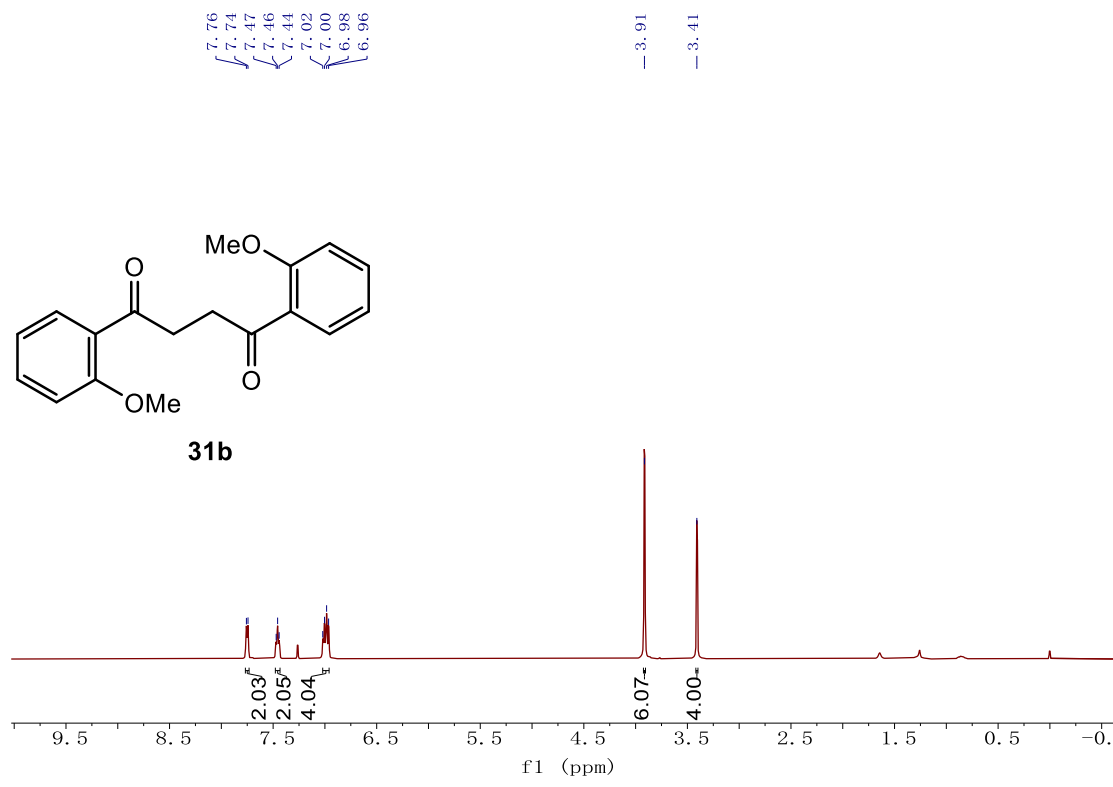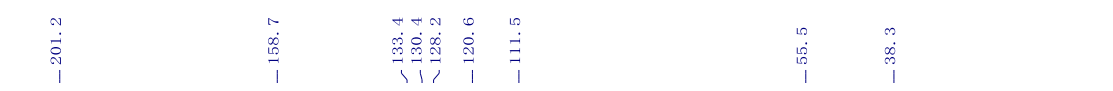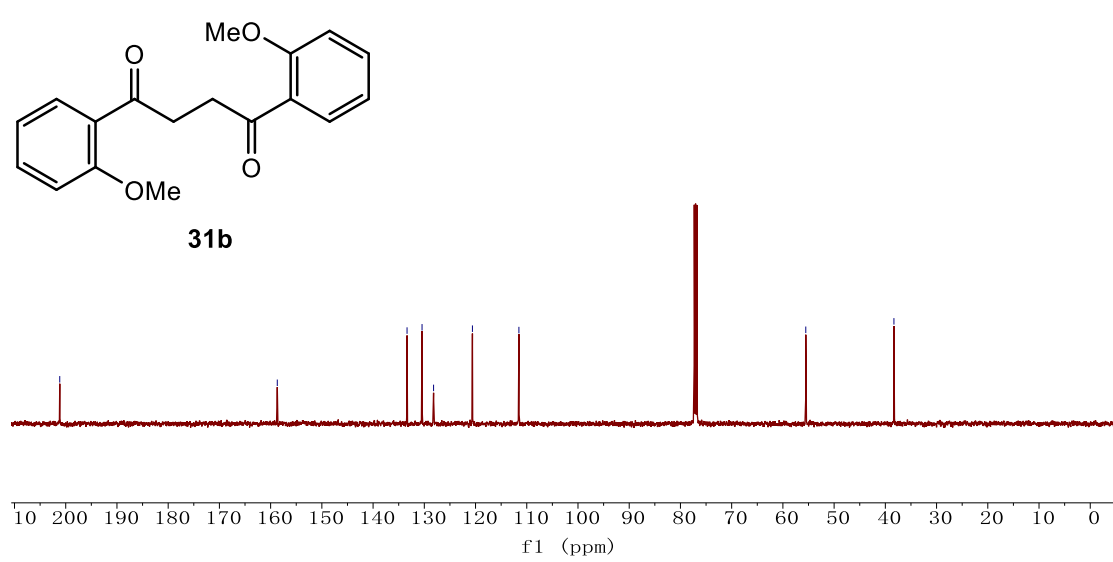

7.98  
7.96  
7.91  
7.91  
7.90  
7.89  
7.88  
7.88  
7.86  
7.56  
7.55  
7.55  
7.54  
7.54  
7.52  
7.52  
7.51  
7.51  
7.46  
7.44  
7.44  
7.25  
7.24  
7.22  
7.18  
7.16  
7.16  
7.14

3.46  
3.46  
3.45  
3.45  
3.44  
3.41  
3.40

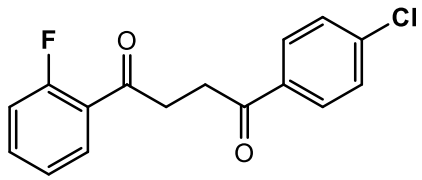

32b

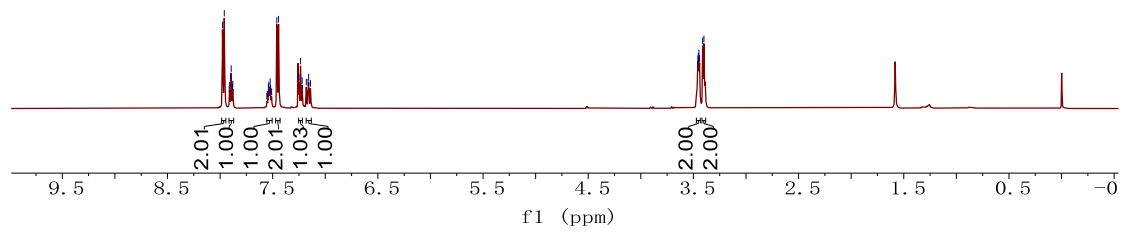

197.3  
196.8  
196.8

163.2  
161.2  
139.5  
135.1  
134.8  
134.7  
130.7  
130.7  
129.6  
128.9  
125.4  
125.2  
124.5  
124.5  
116.8  
116.6

37.4  
37.3  
32.5

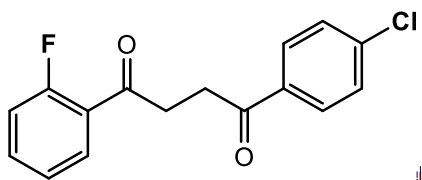

32b

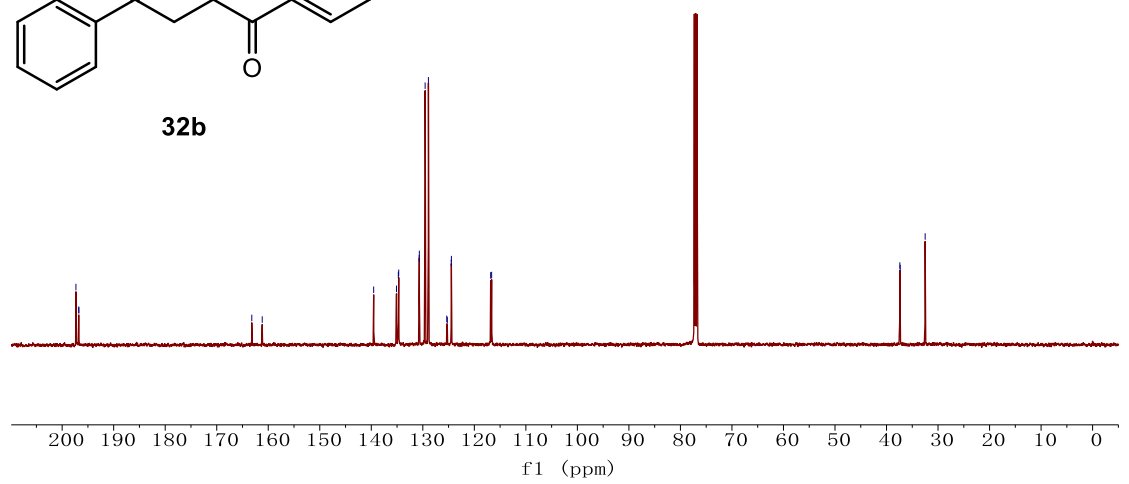



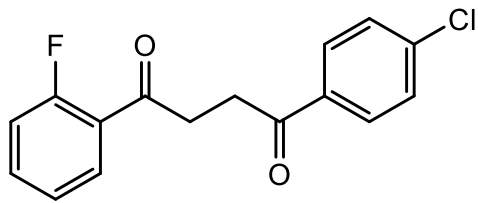

**32b**

<sup>19</sup>F NMR

376 MHz

CDCl<sub>3</sub>

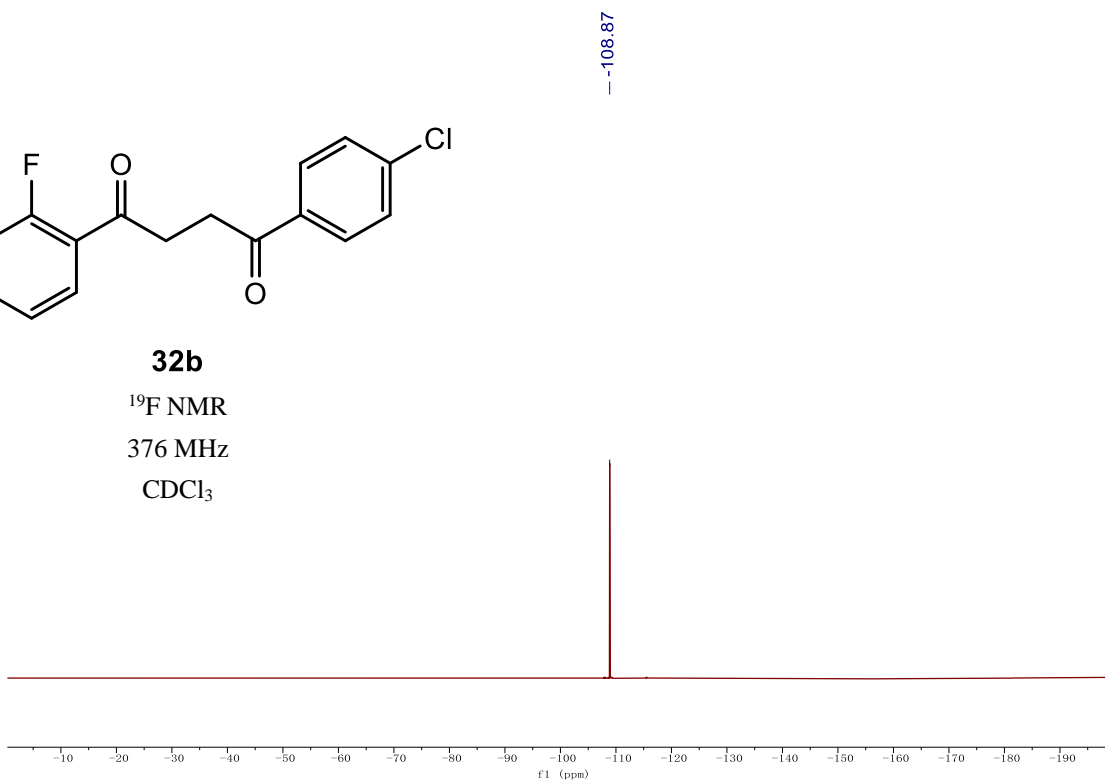

8.12  
8.10  
8.09  
8.08  
8.06  
7.71  
7.70  
7.65  
7.63  
7.49  
7.48  
7.46  
7.42  
7.41  
7.39  
7.17  
7.15  
7.14

3.49  
3.48  
3.46  
3.45

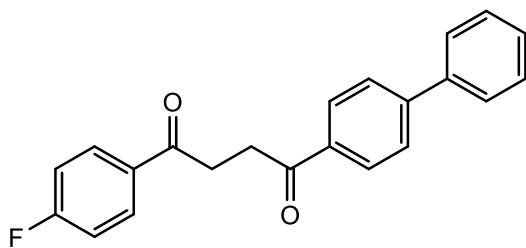

**33b**

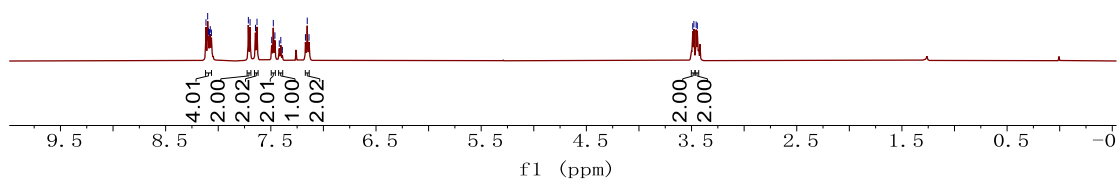

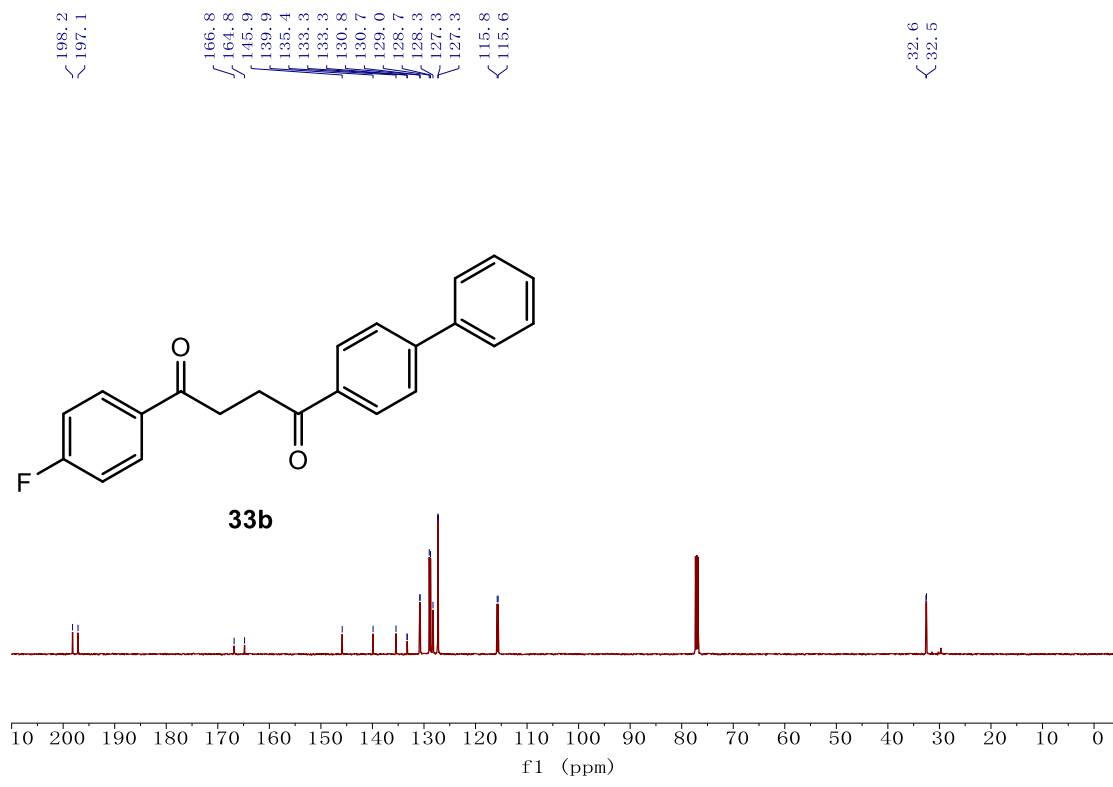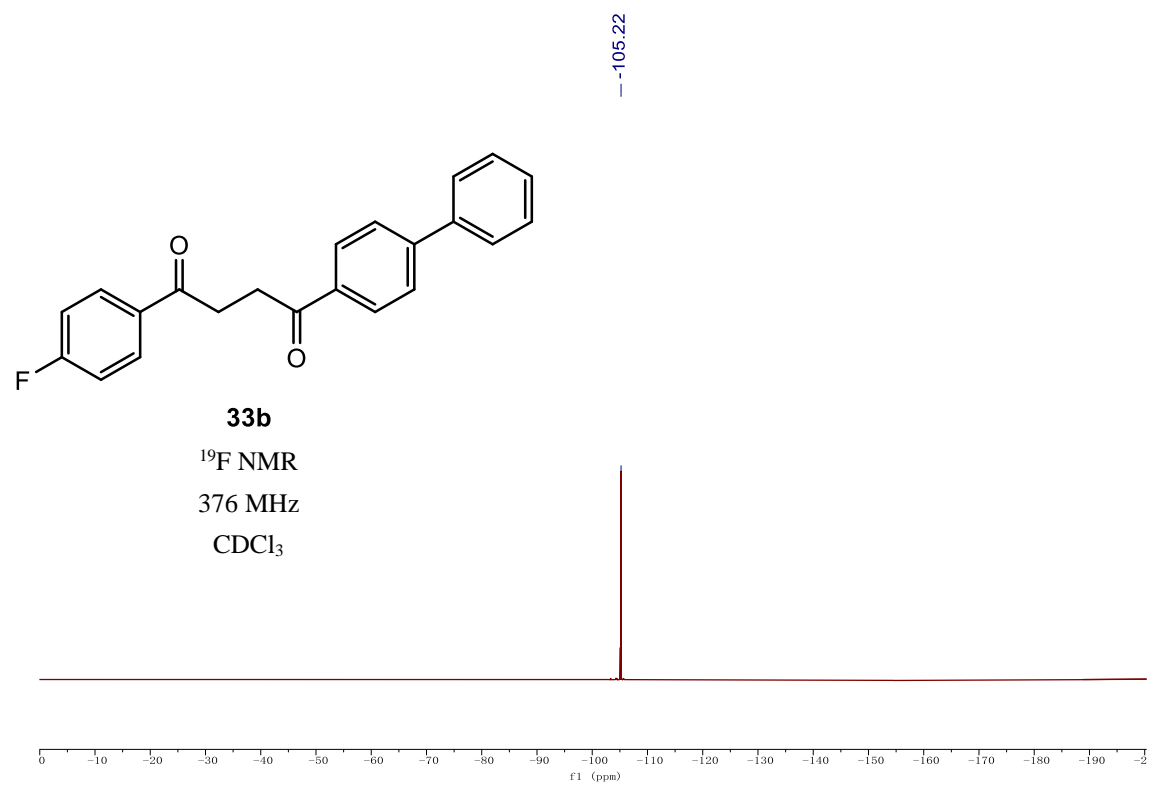

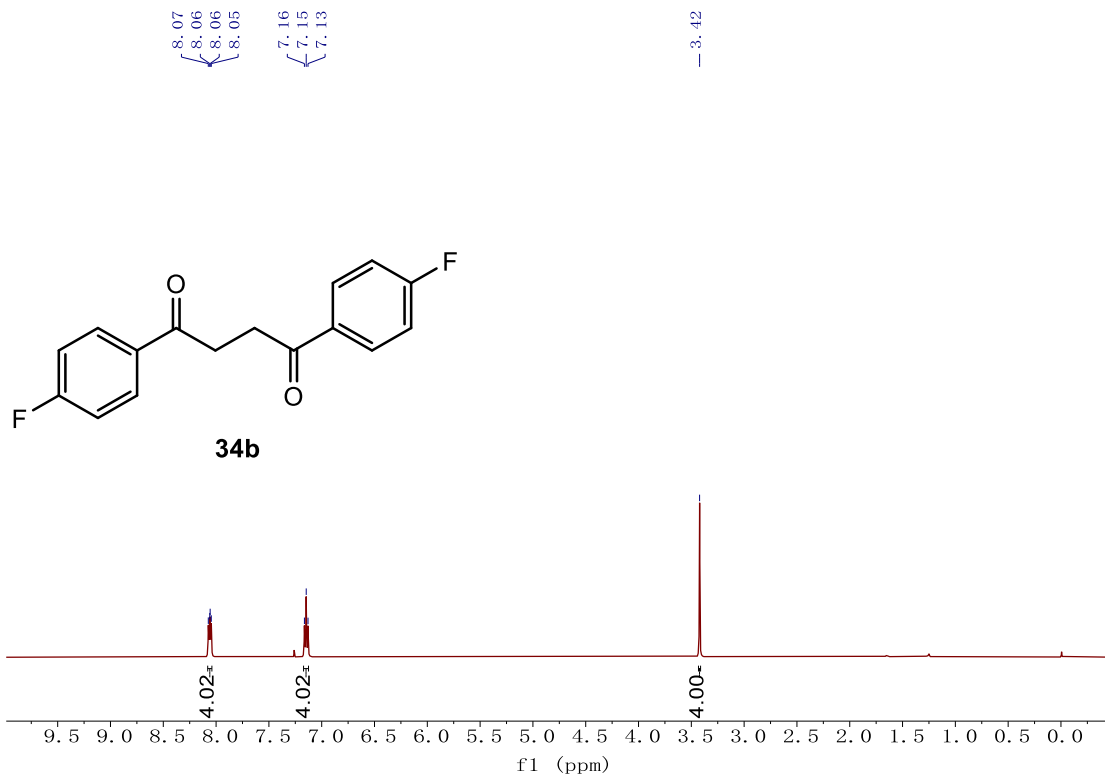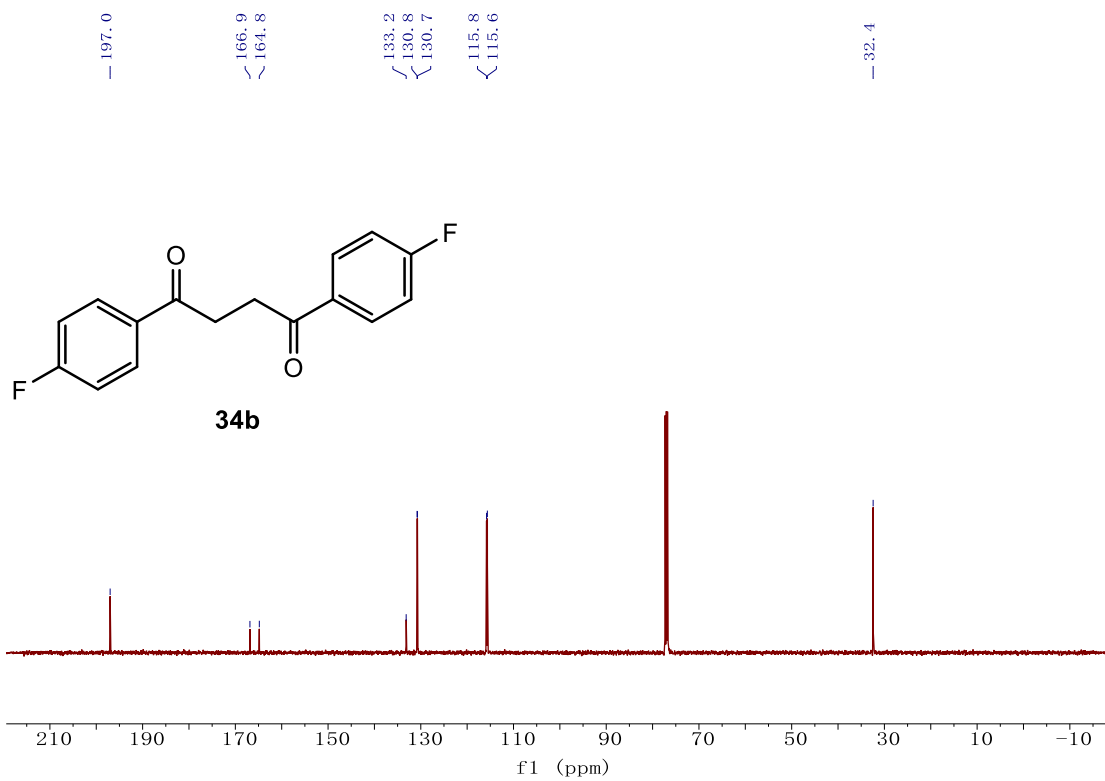

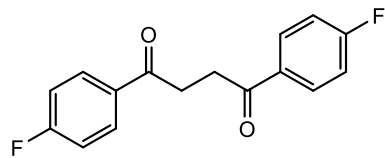

**34b**

<sup>19</sup>F NMR

376 MHz

CDCl<sub>3</sub>

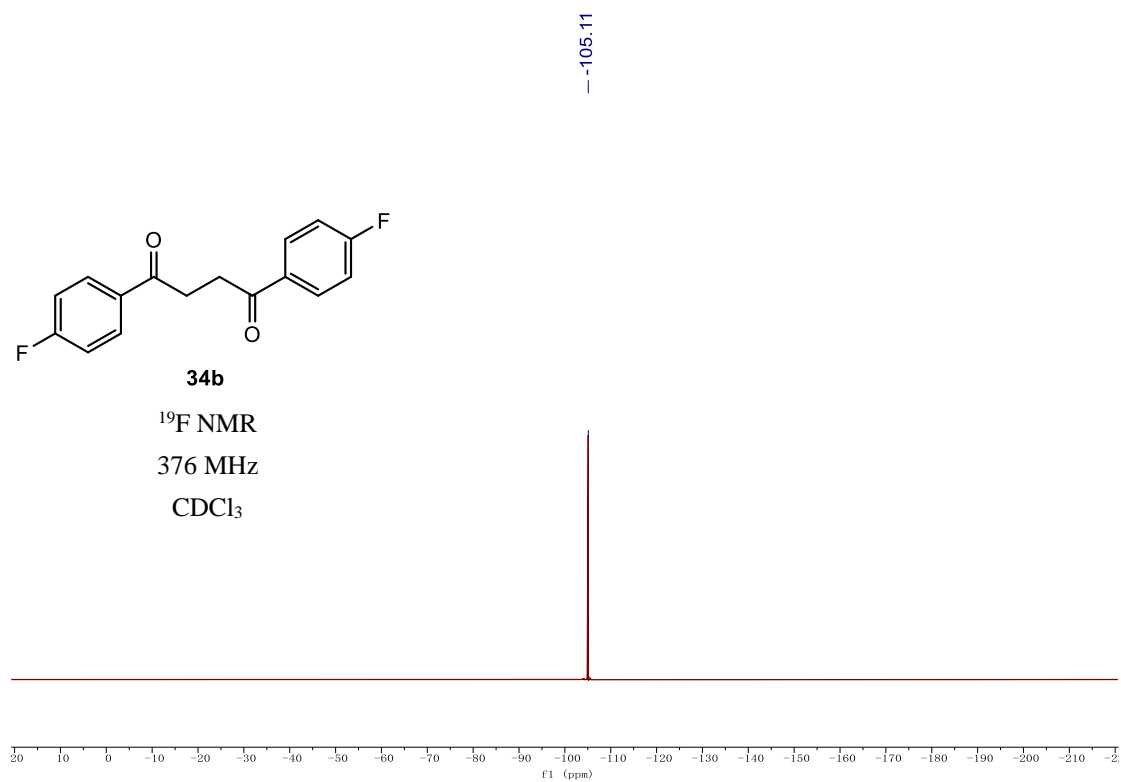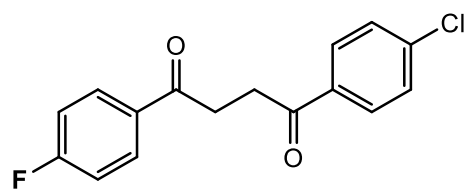

**35b**

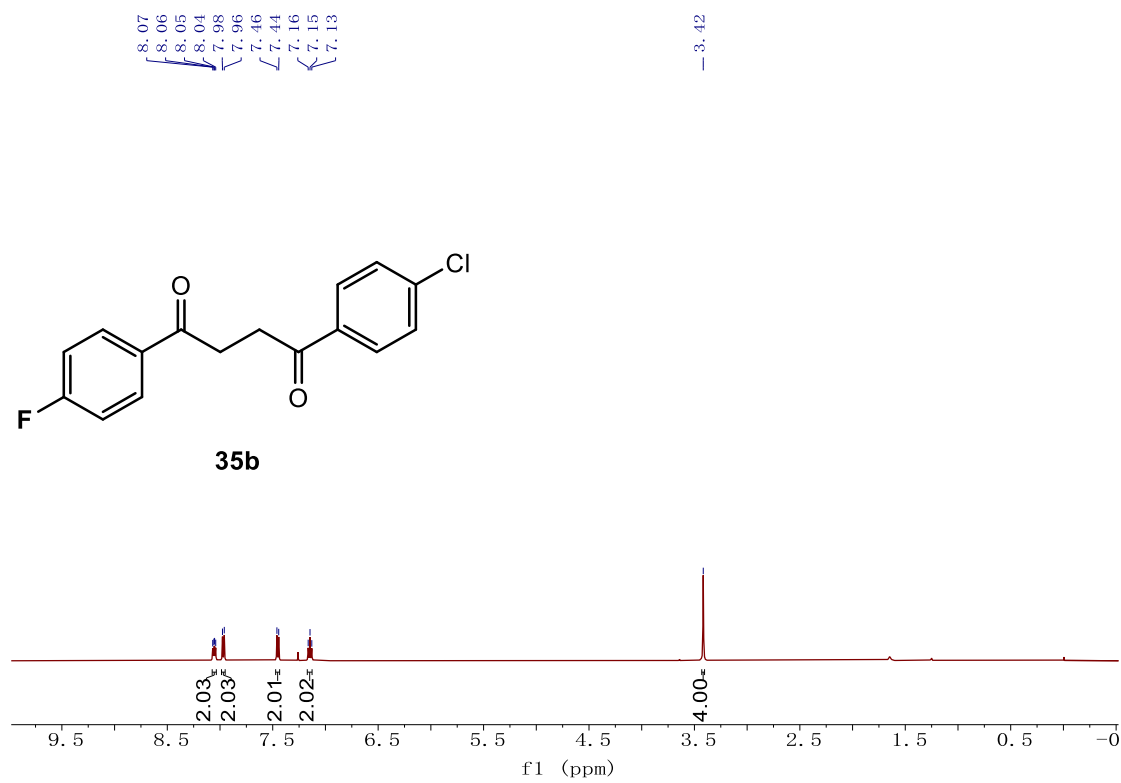

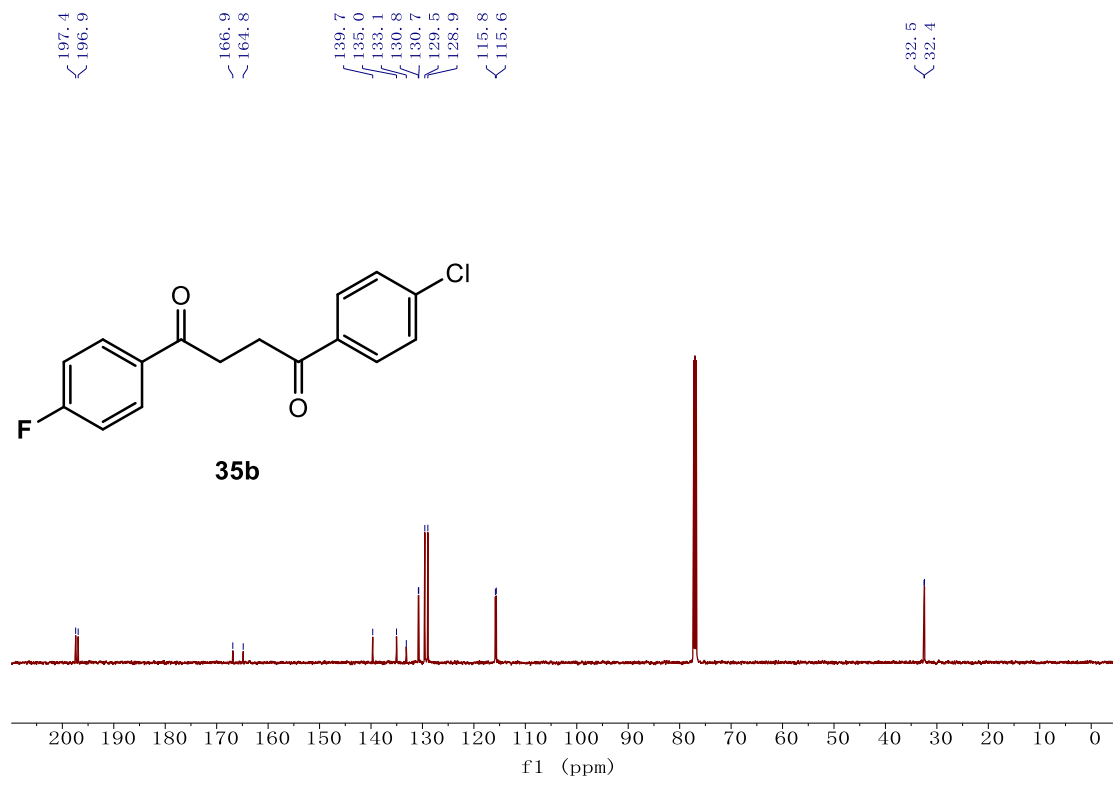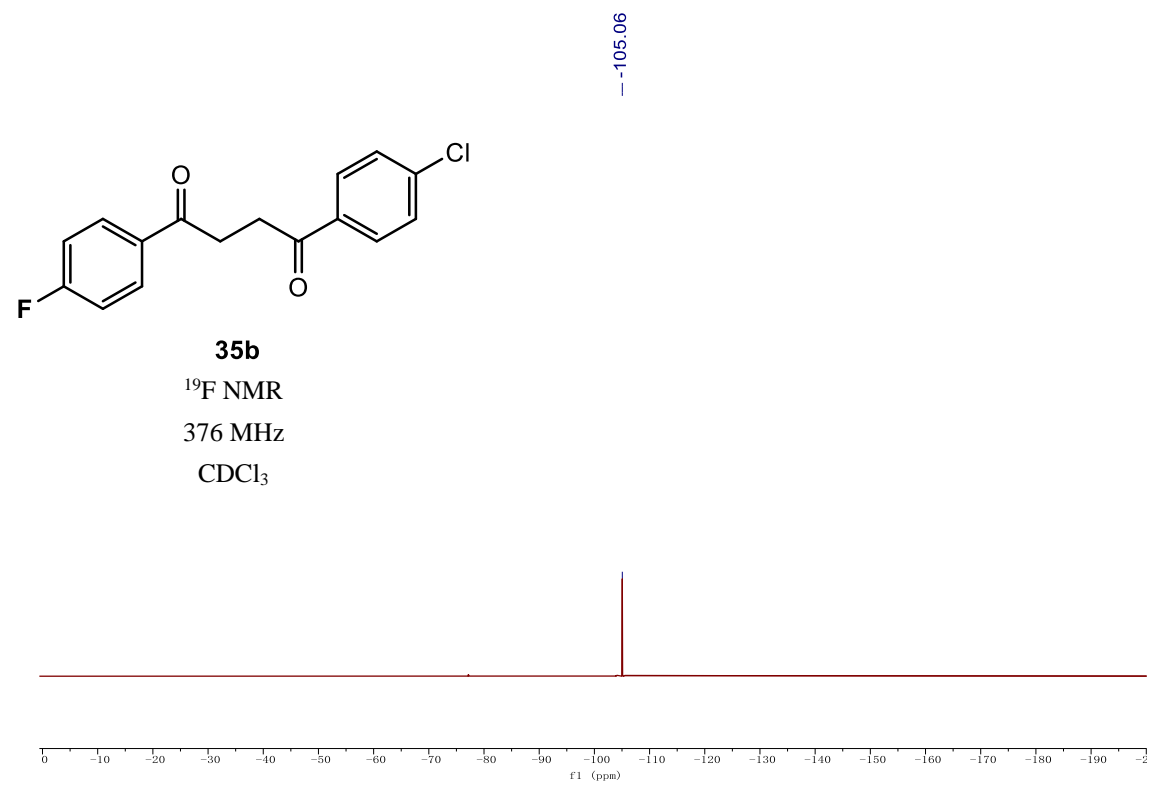

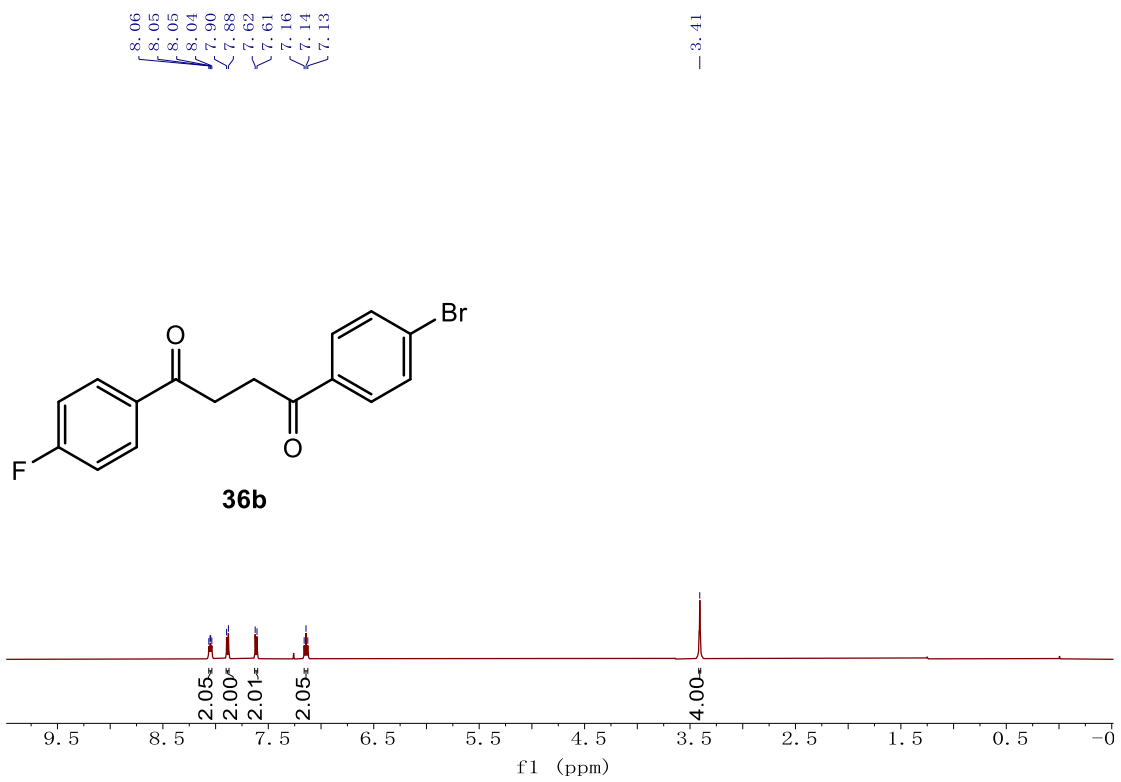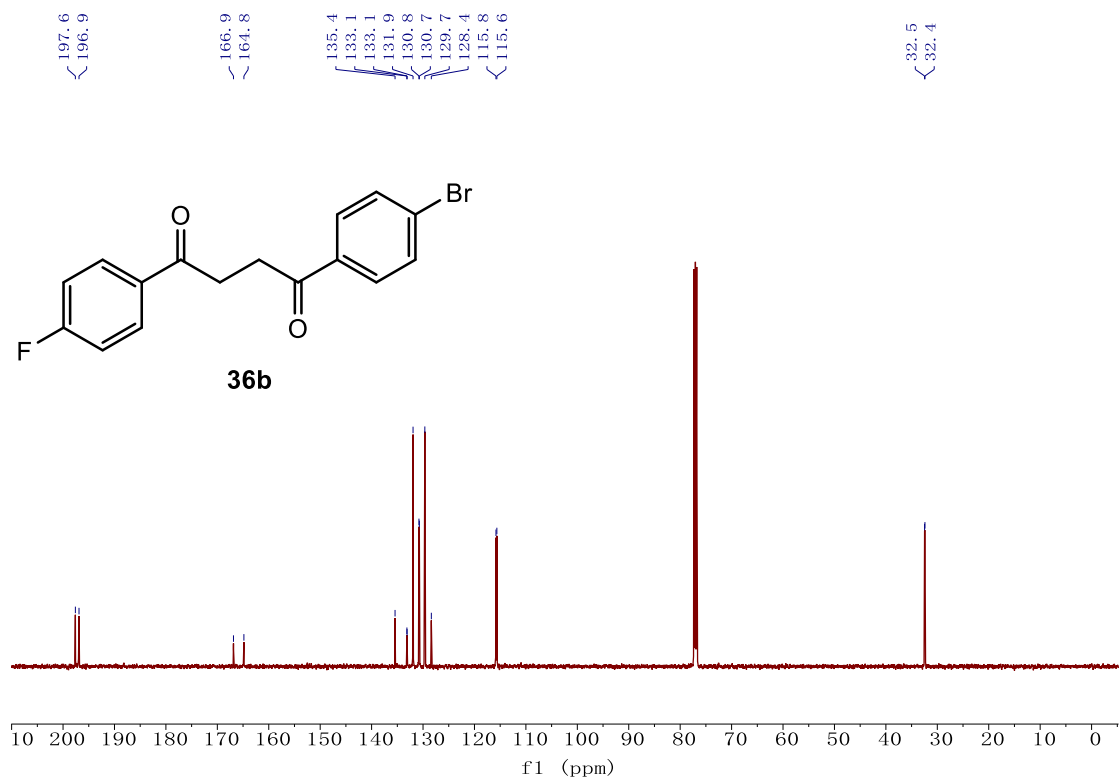

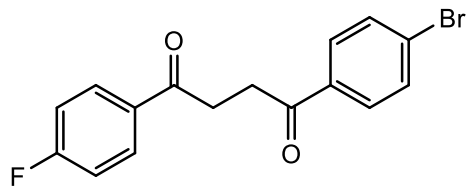

**36b**

<sup>19</sup>F NMR  
376 MHz  
CDCl<sub>3</sub>

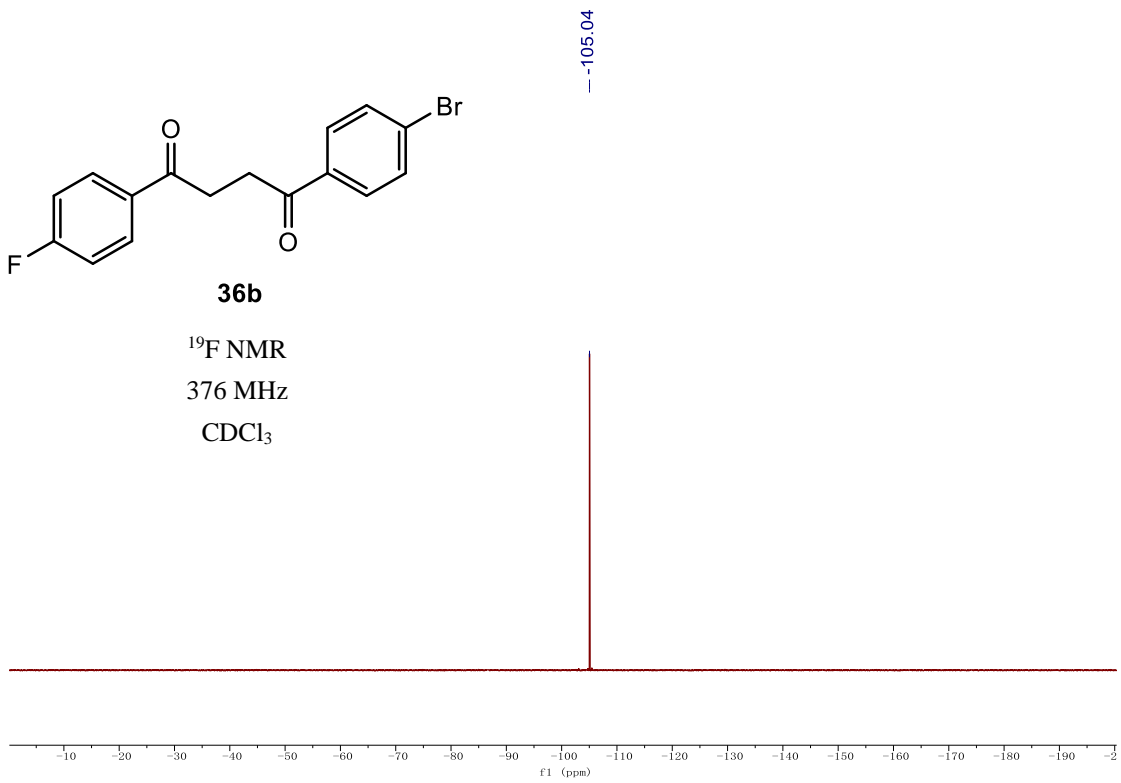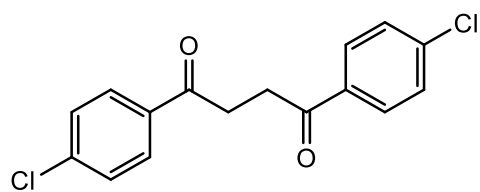

**37b**

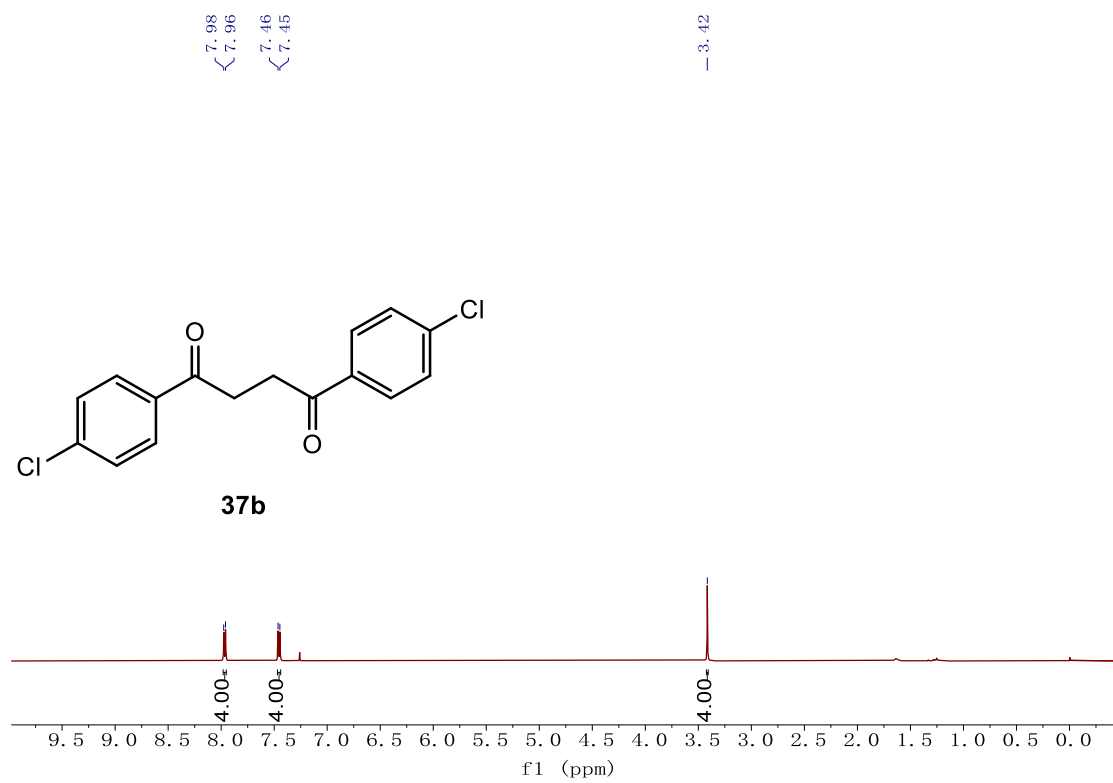

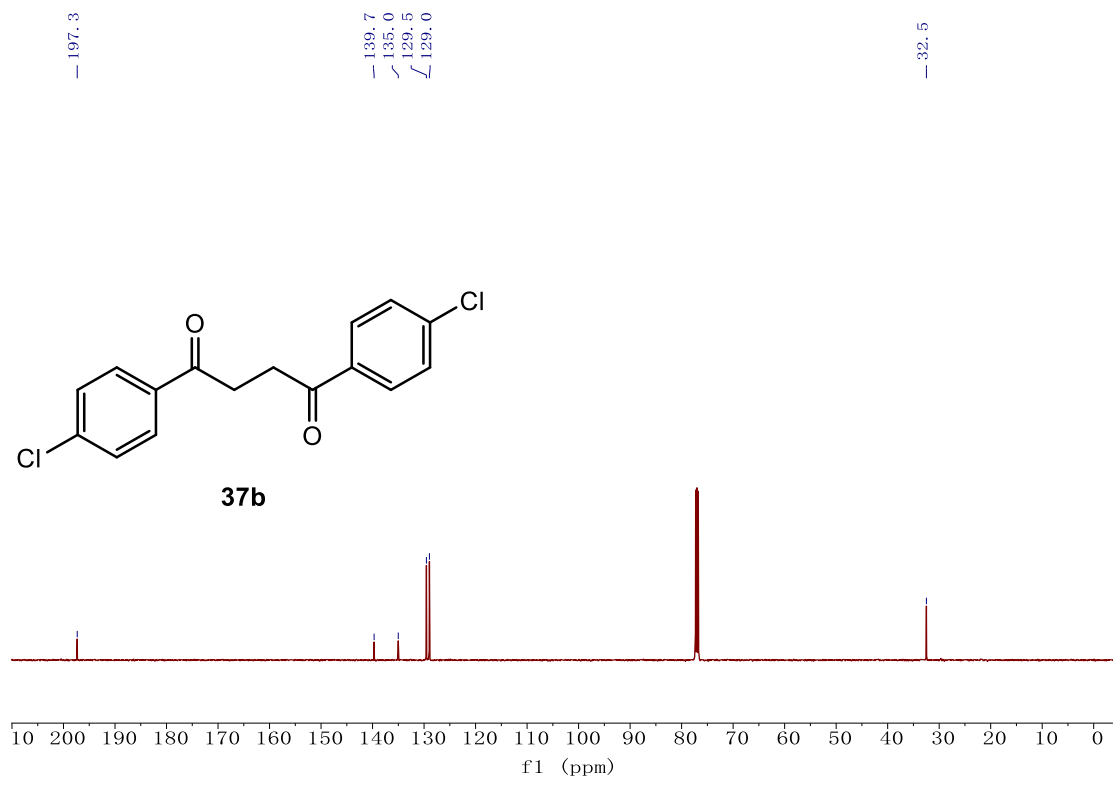



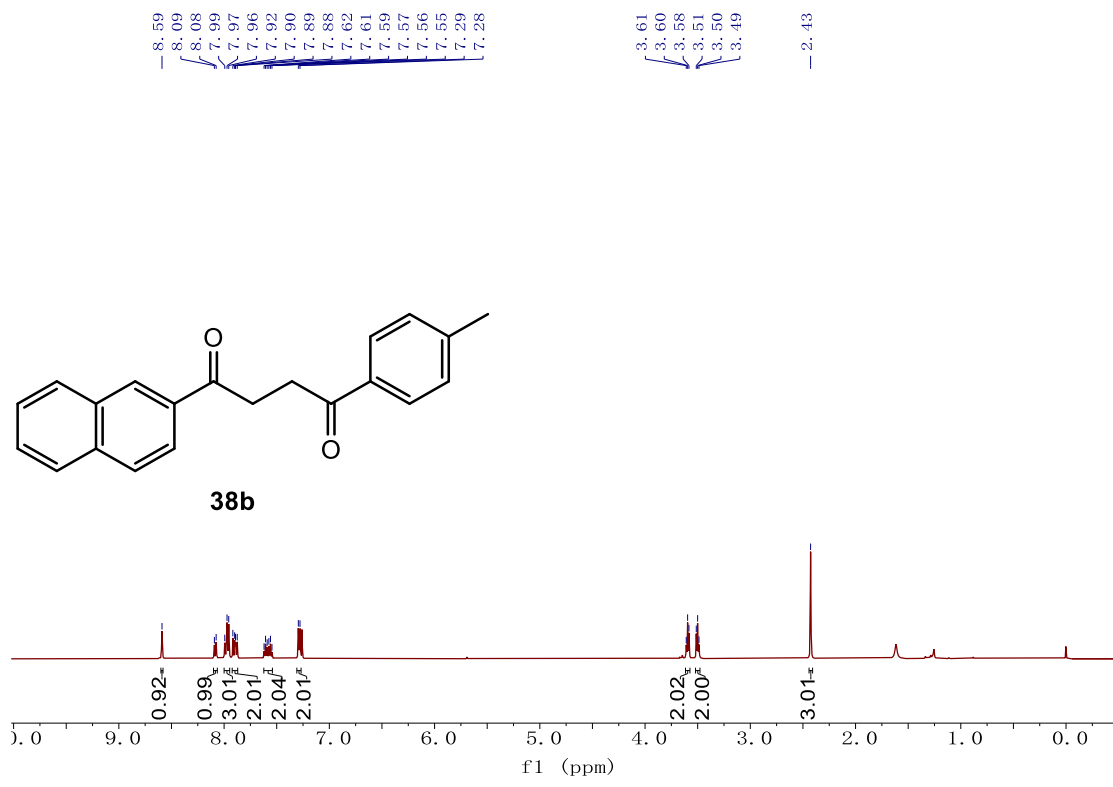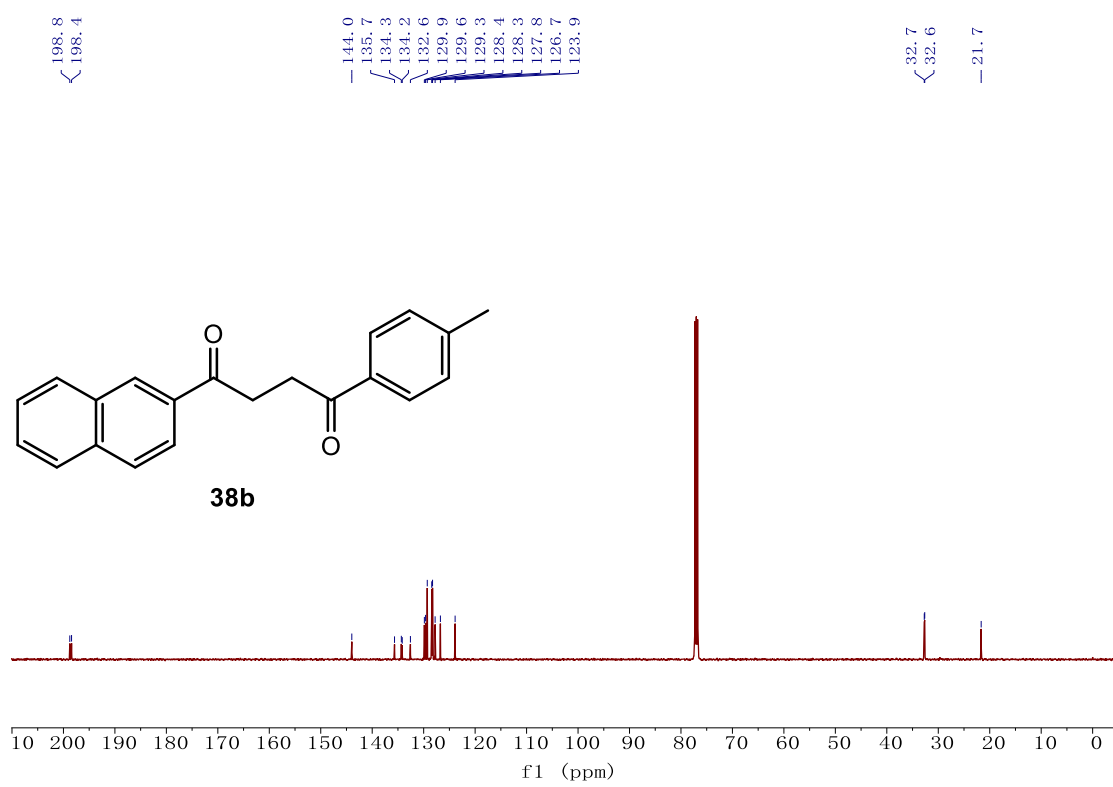

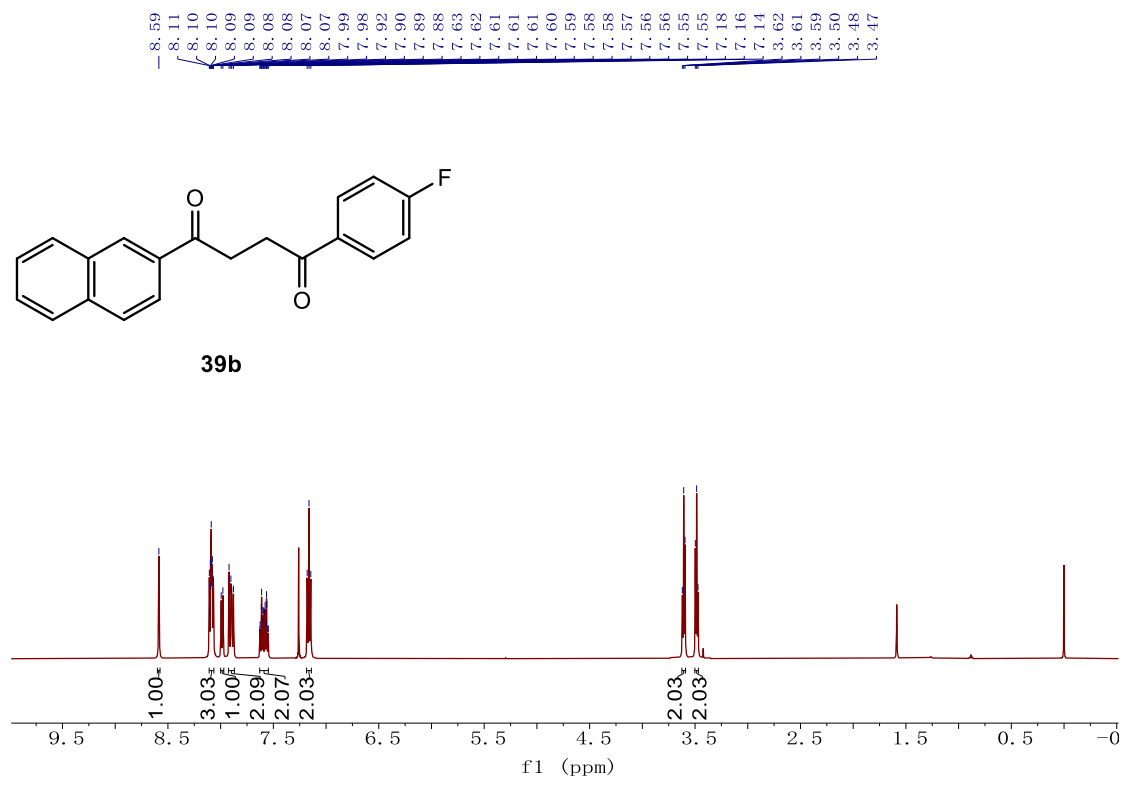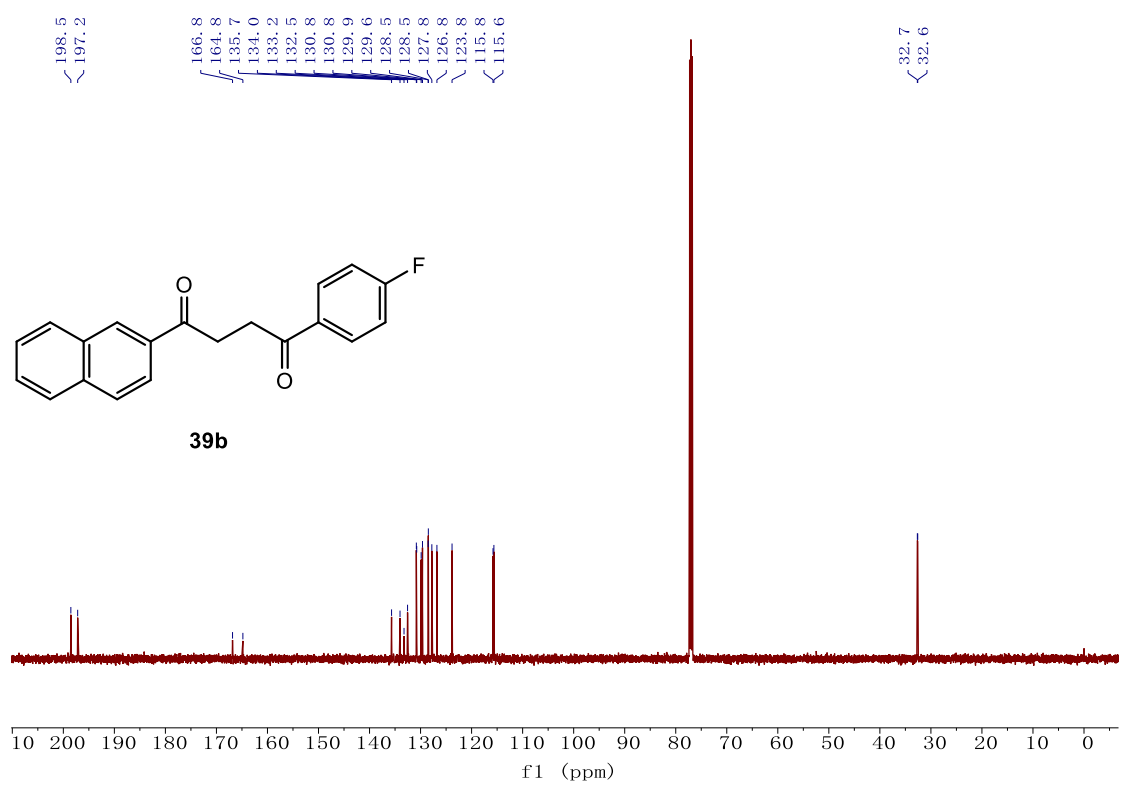

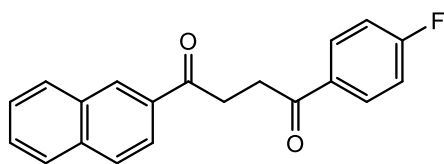

**39b**

$^{19}\text{F}$  NMR

376 MHz

$\text{CDCl}_3$

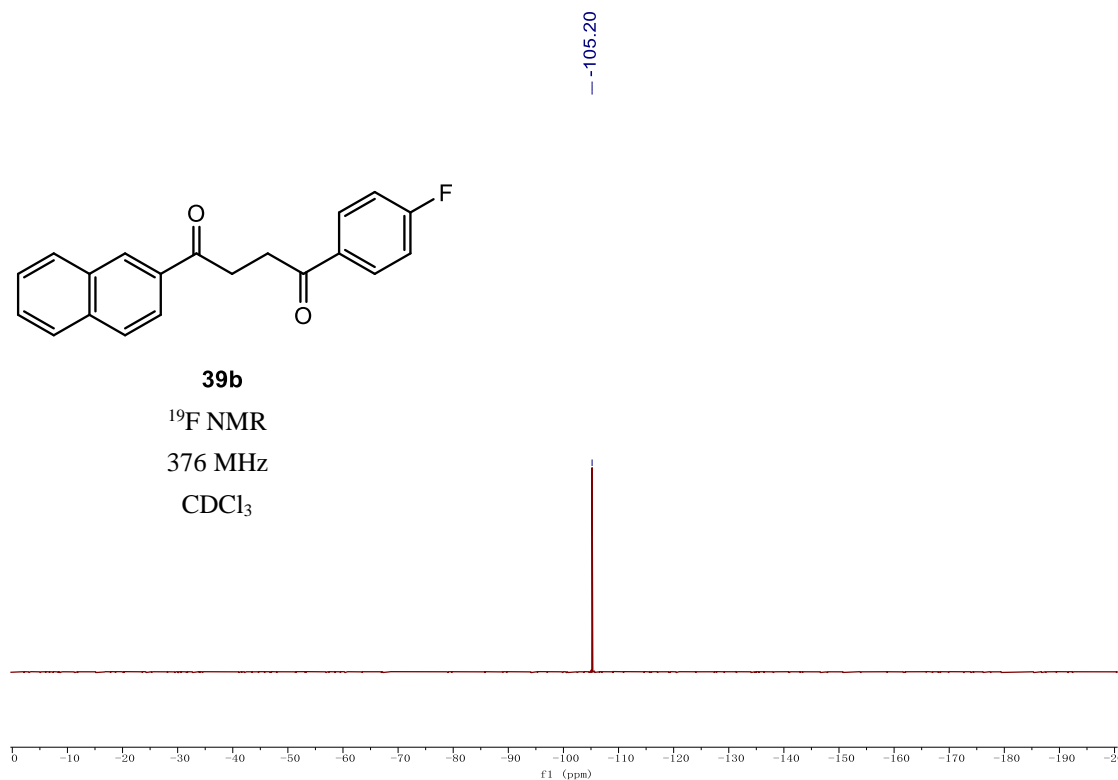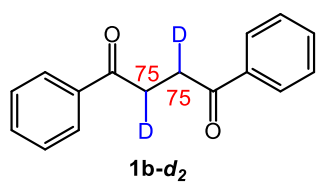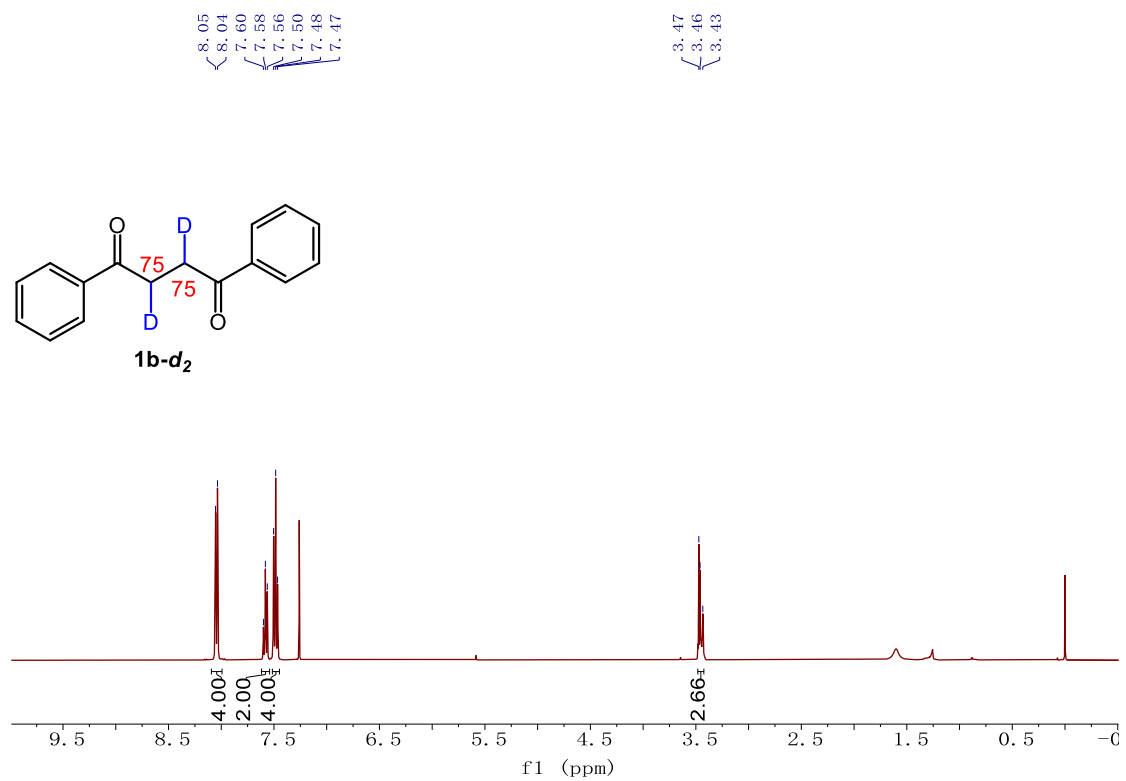

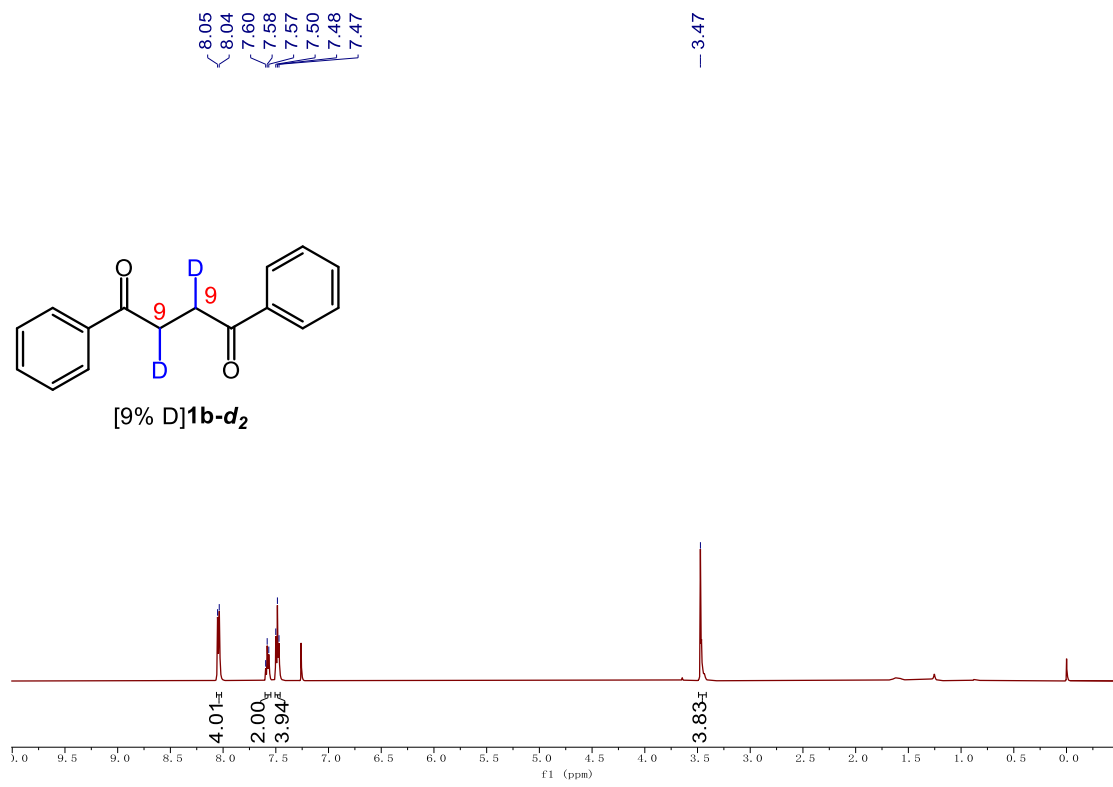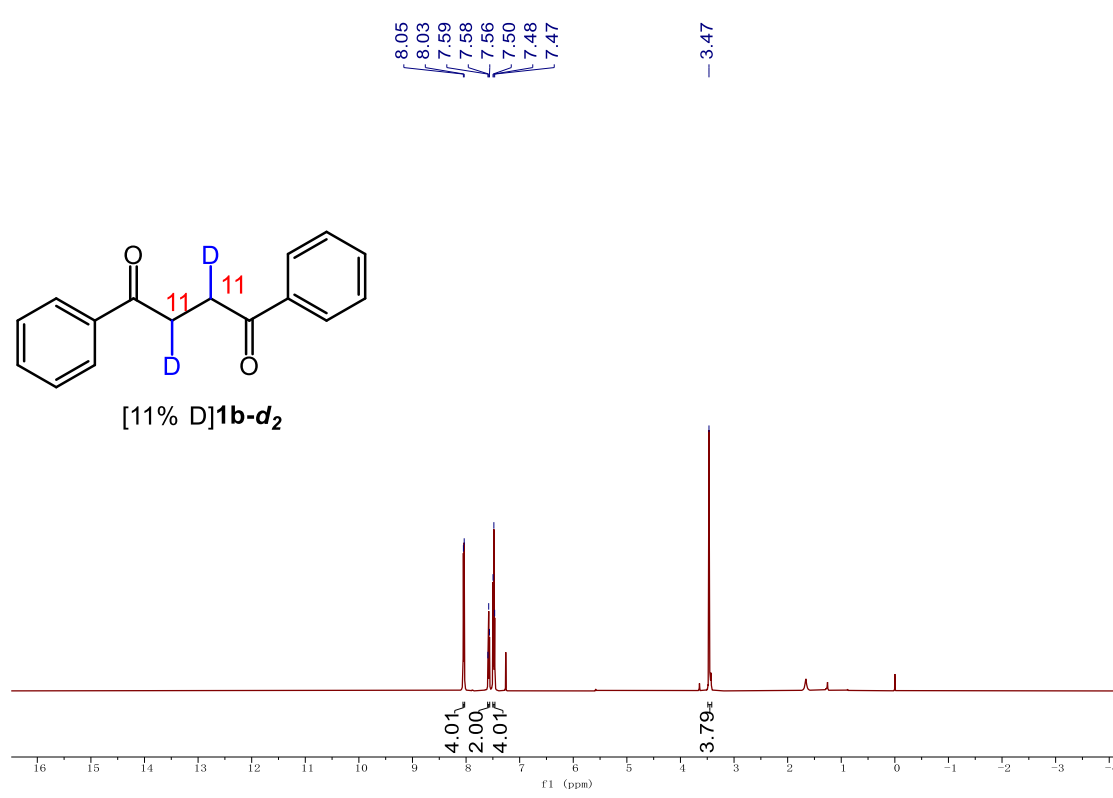

7.78  
7.76  
7.44  
7.42  
7.41  
7.30  
7.29  
7.27  
6.75

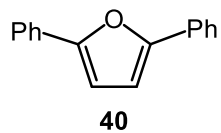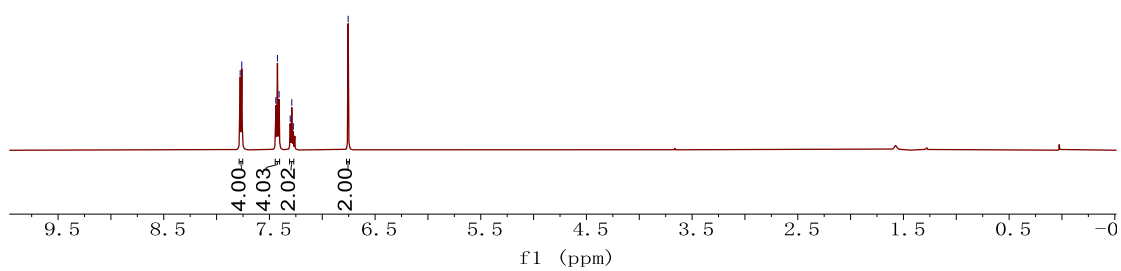

153.4  
130.8  
128.7  
127.4  
123.7  
107.2

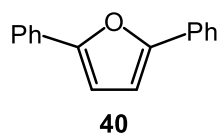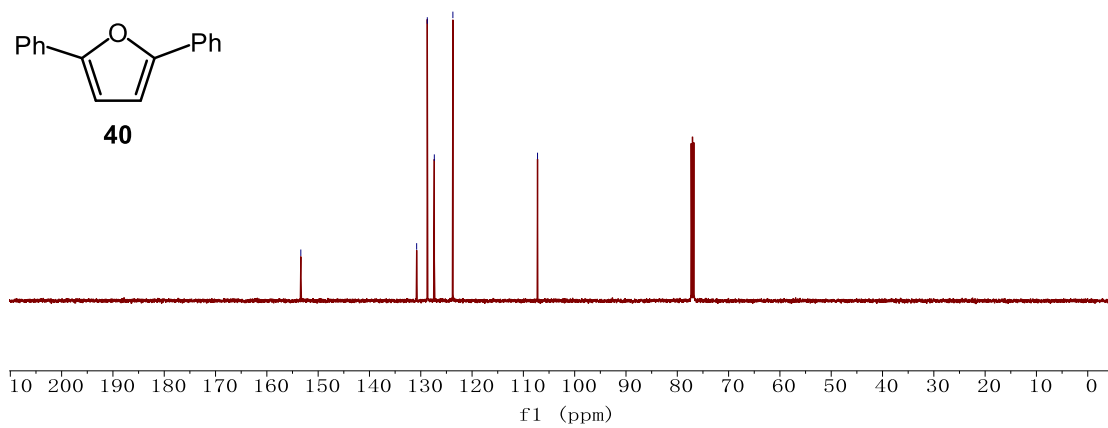

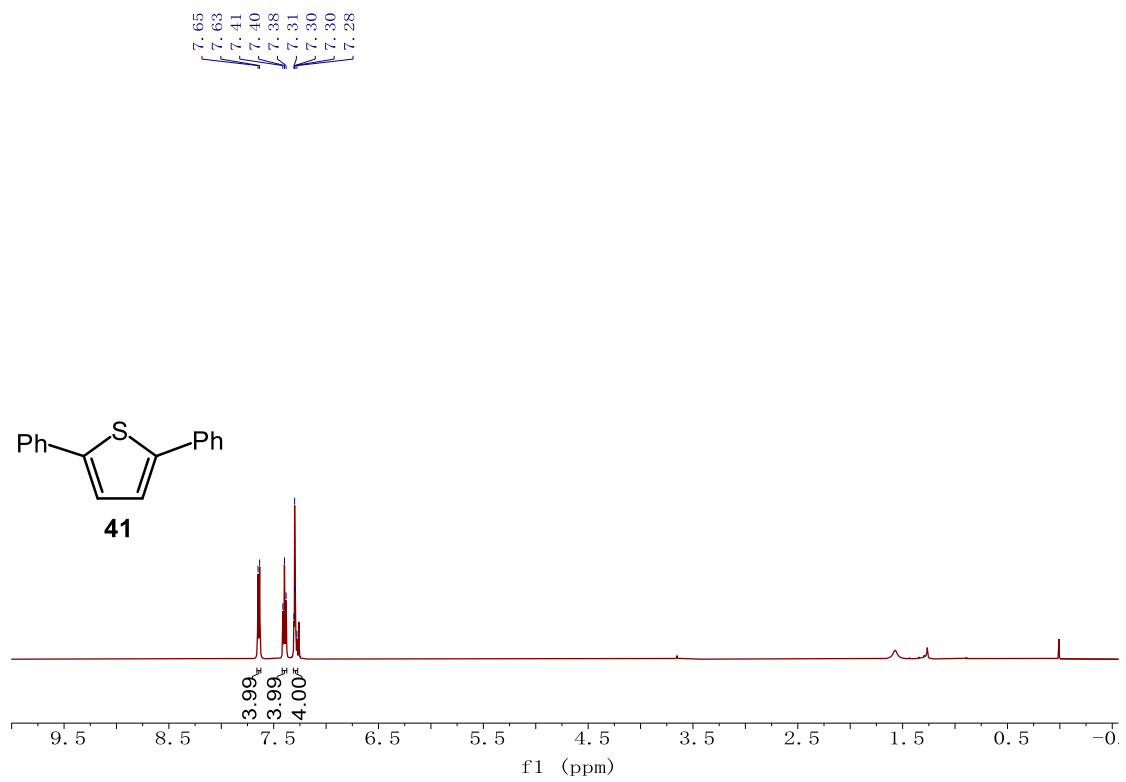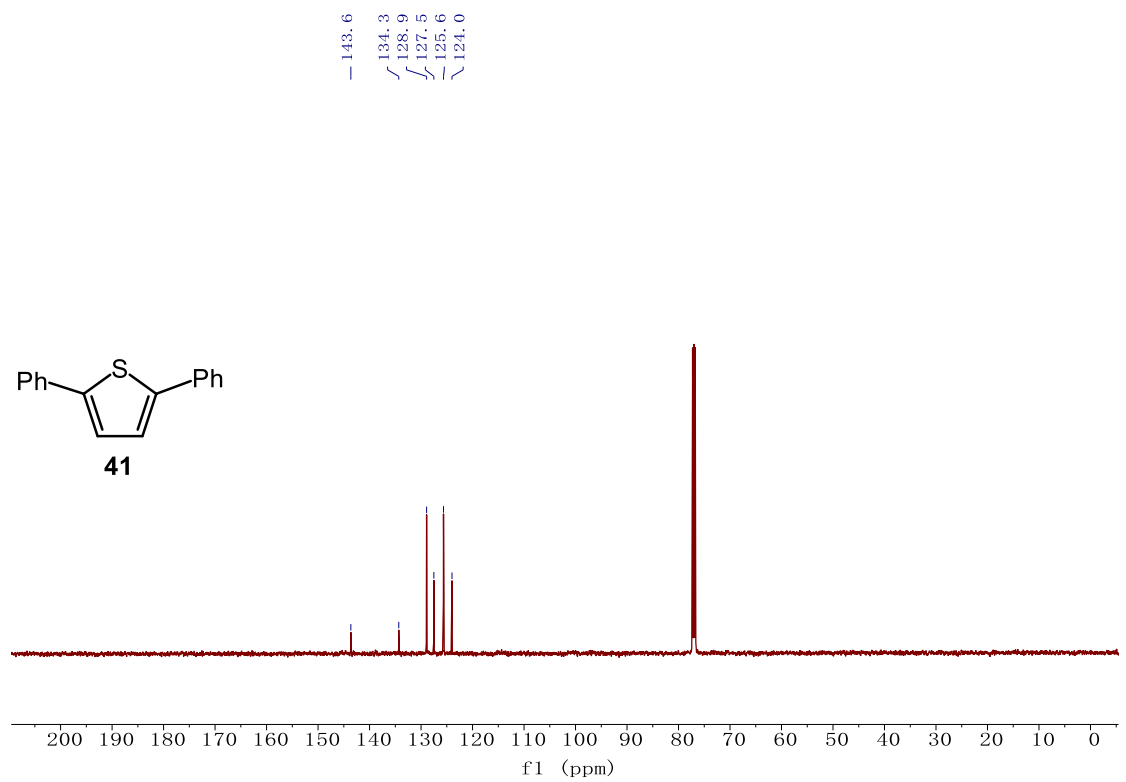

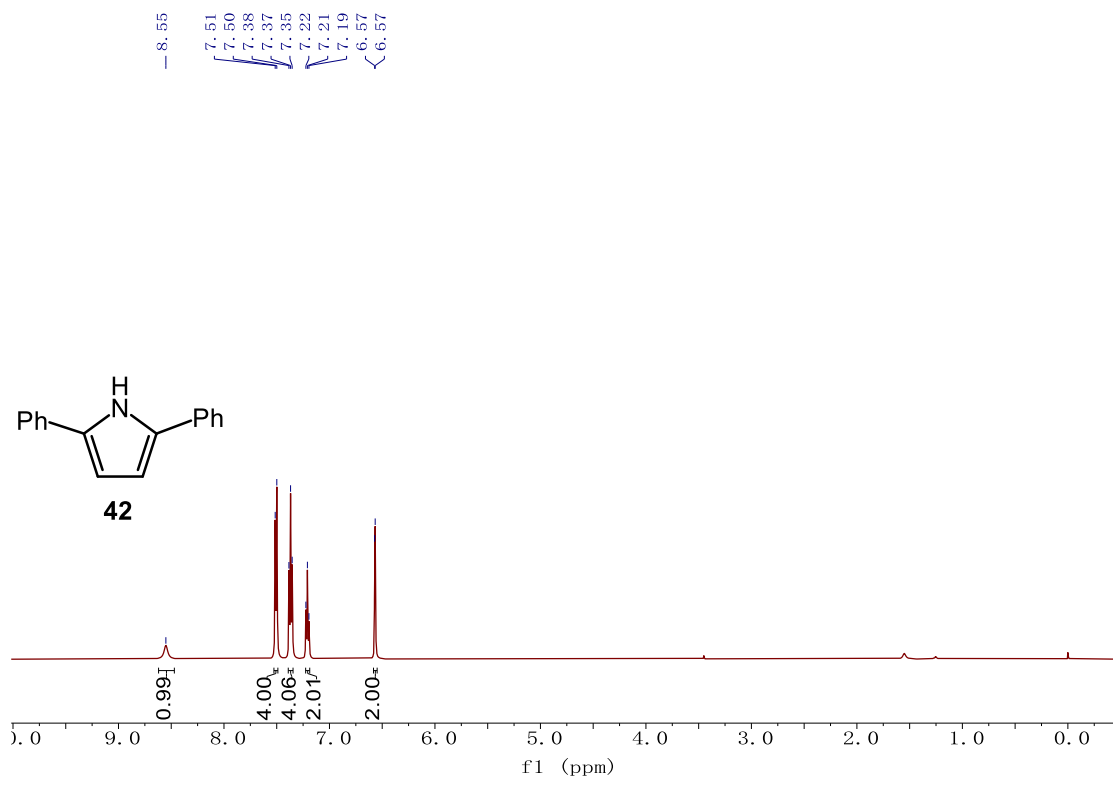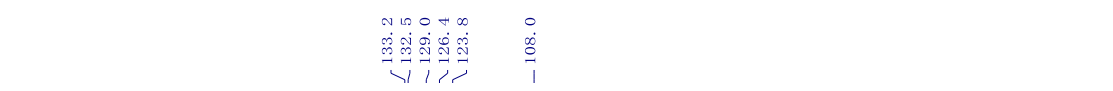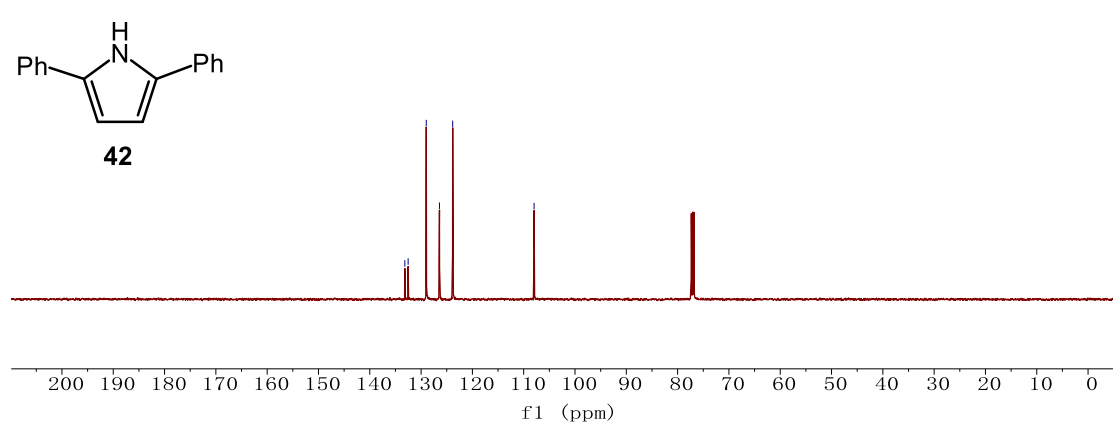

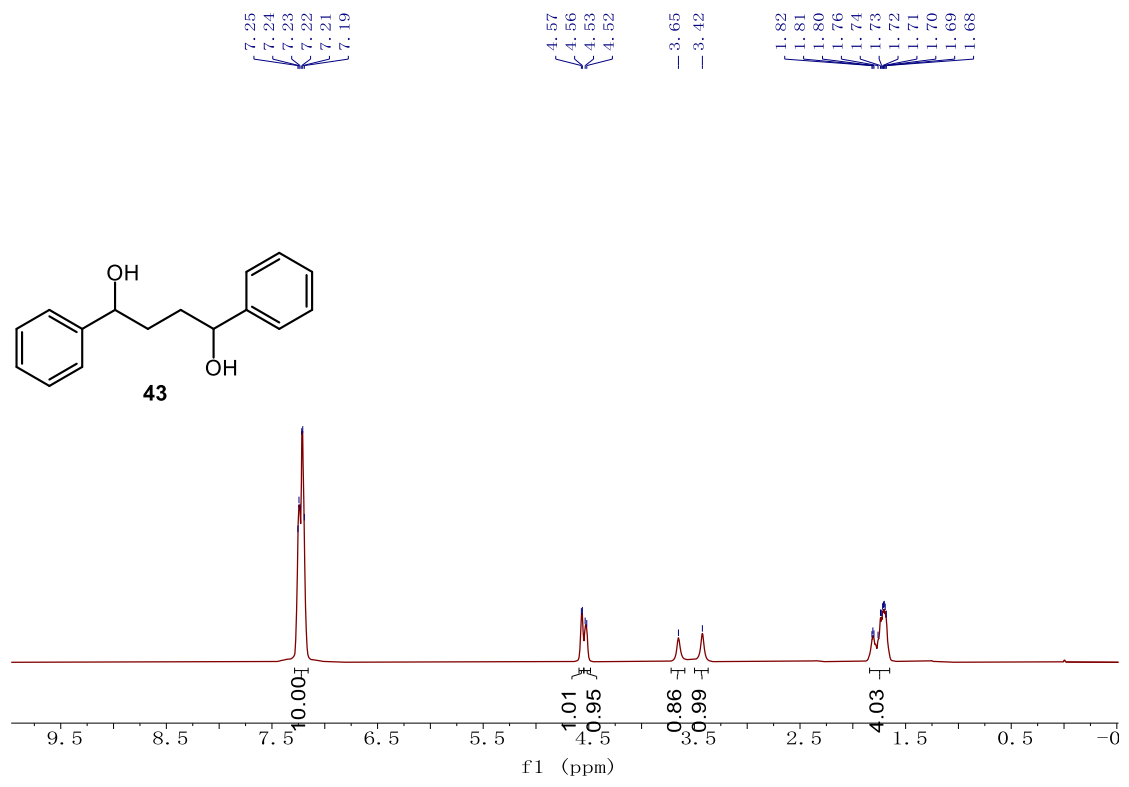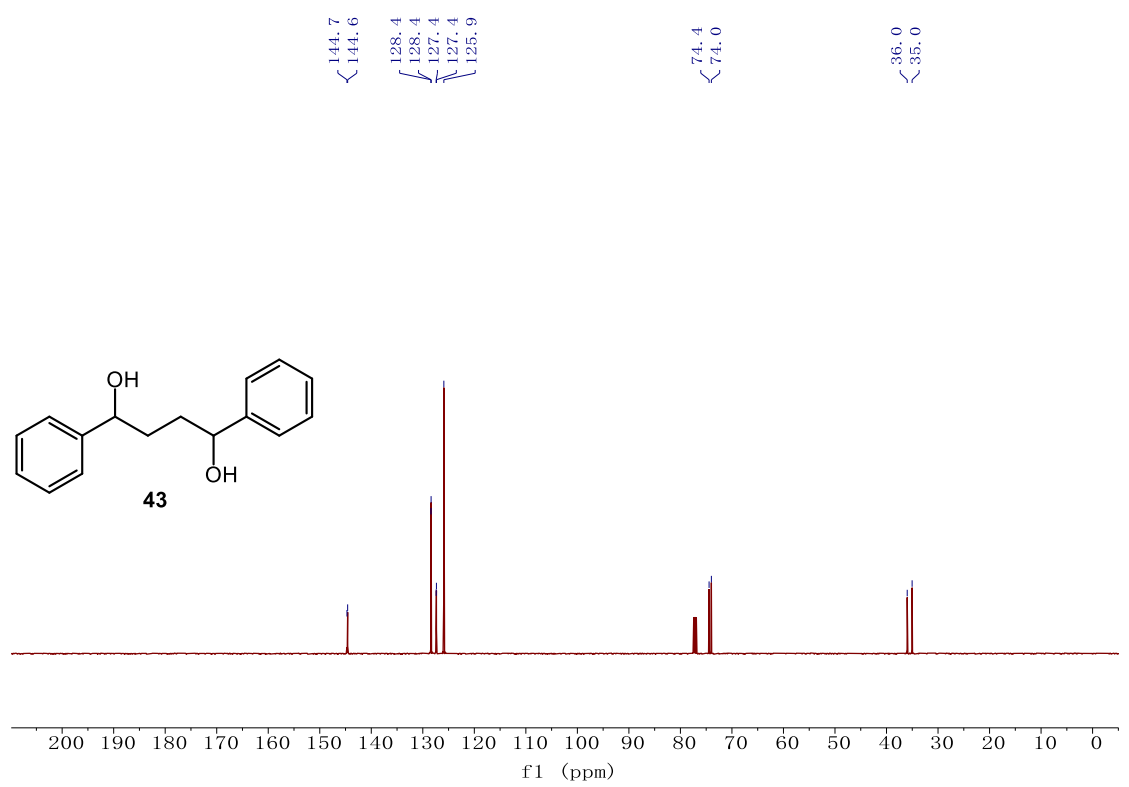



8.17  
8.16  
7.93  
7.56  
7.55  
7.53  
7.52  
7.51  
7.49

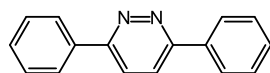

44

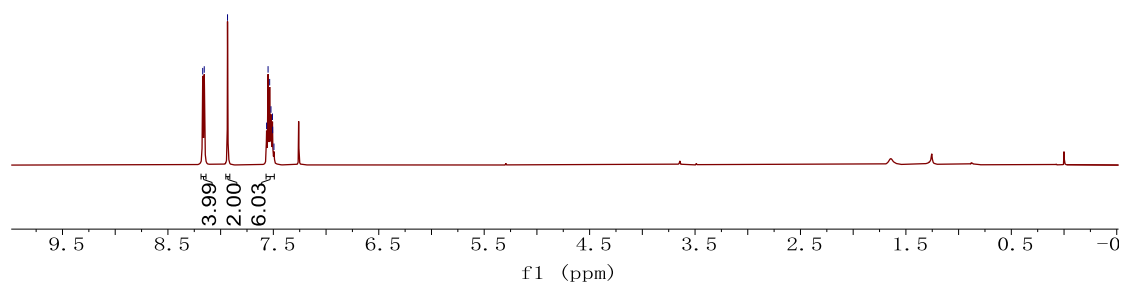

157.7  
136.2  
130.0  
129.0  
127.0  
124.2

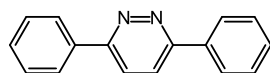

44

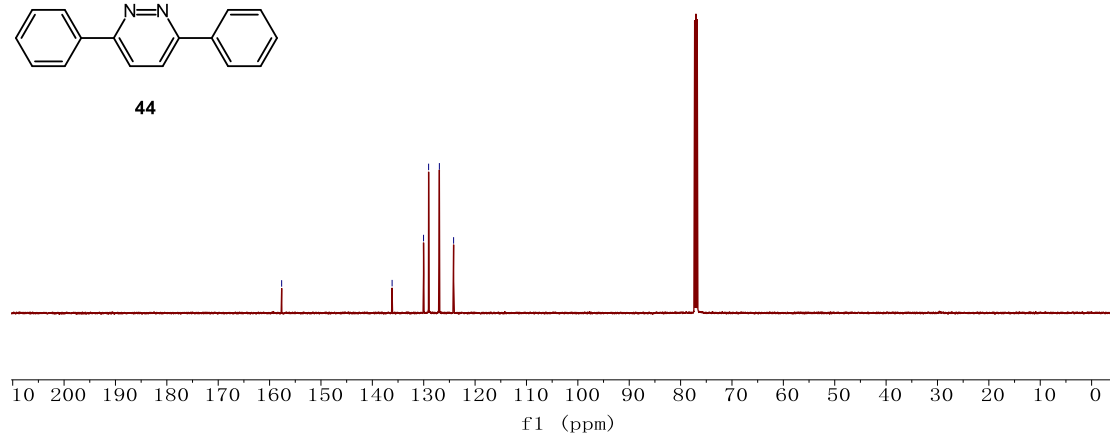

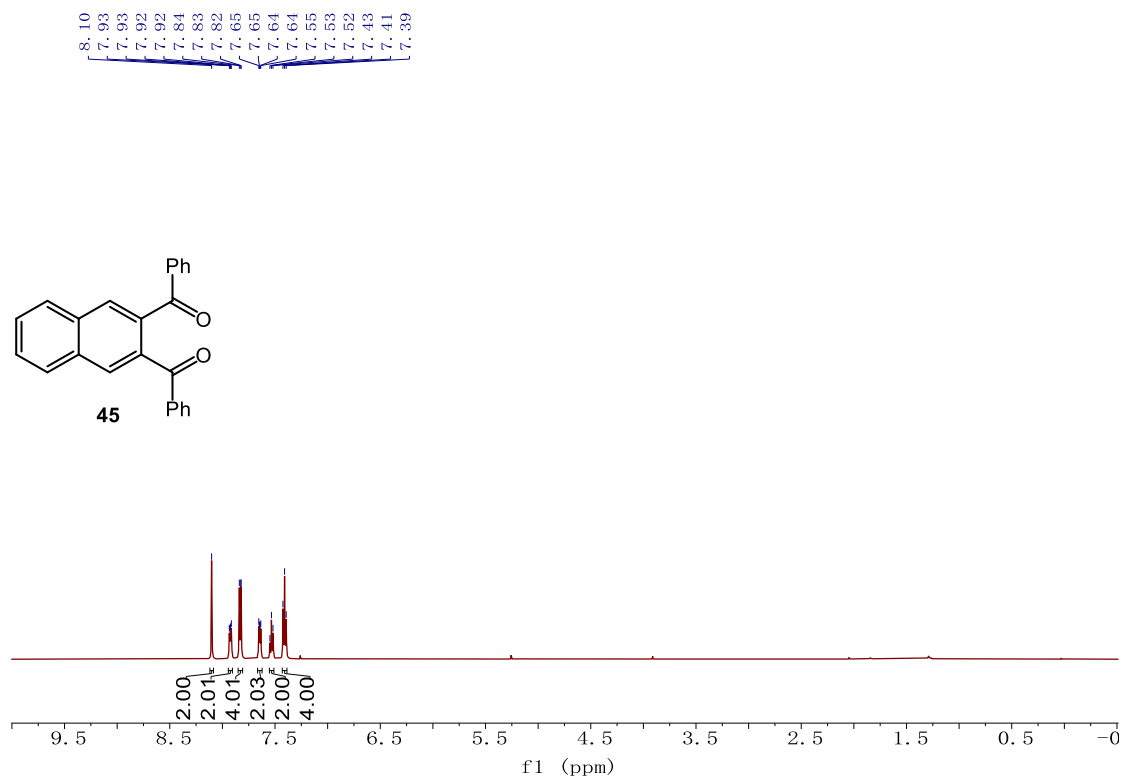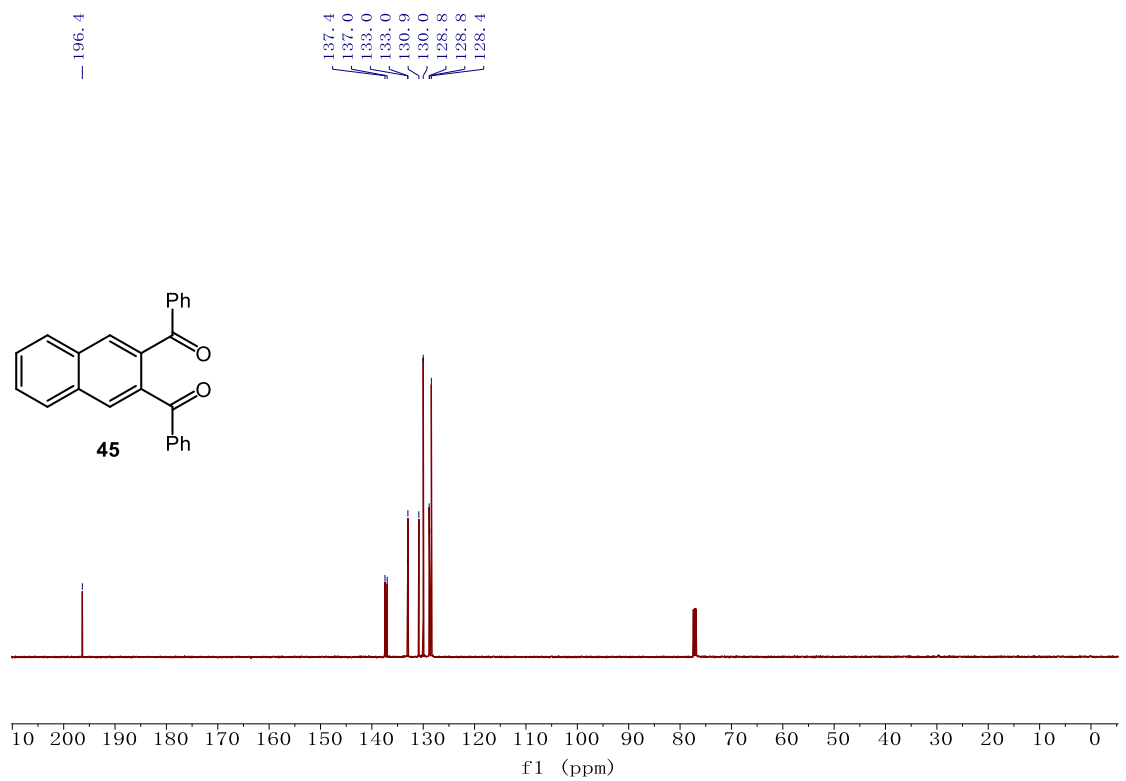

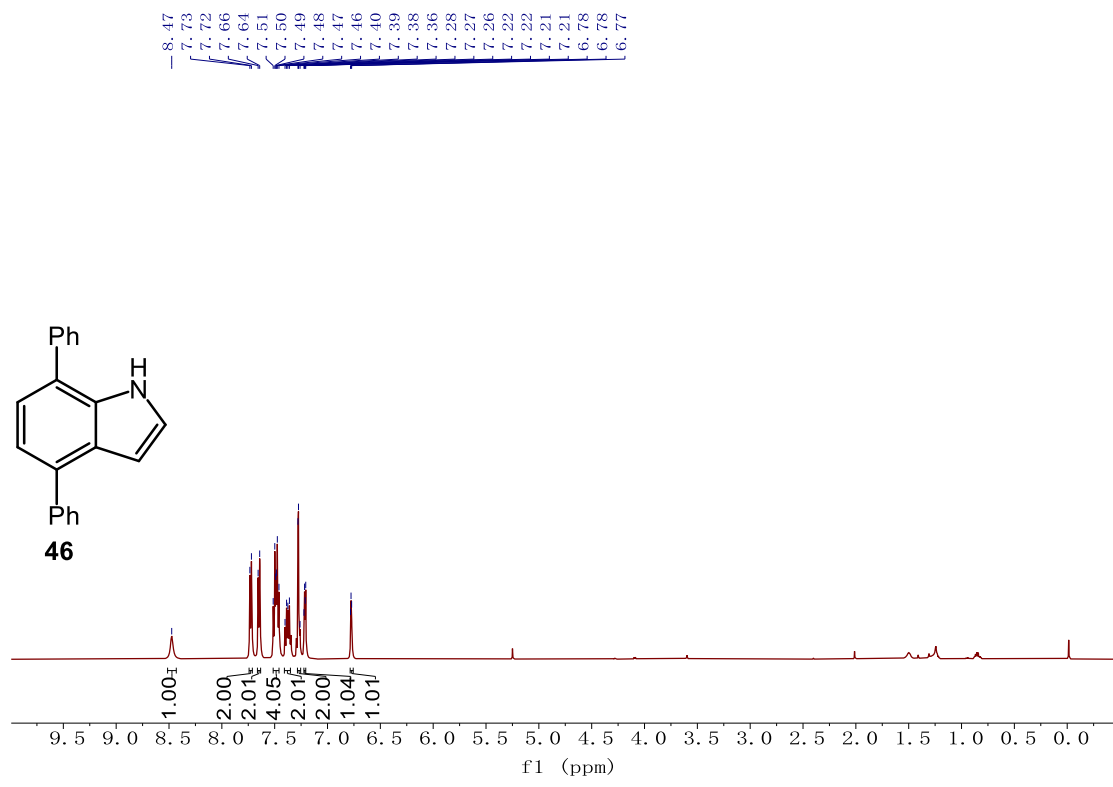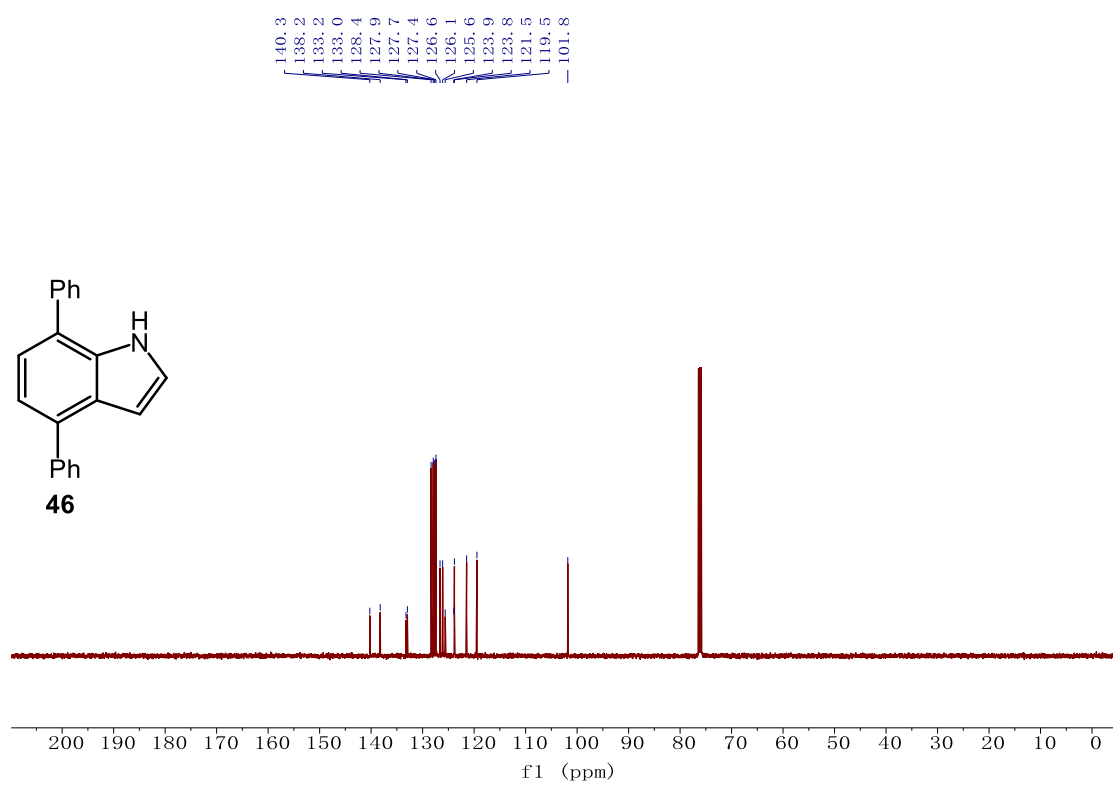

7.75  
7.74  
7.41  
7.40  
7.39  
7.28  
7.25  
- 6.73

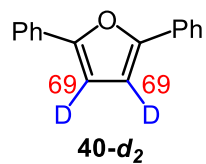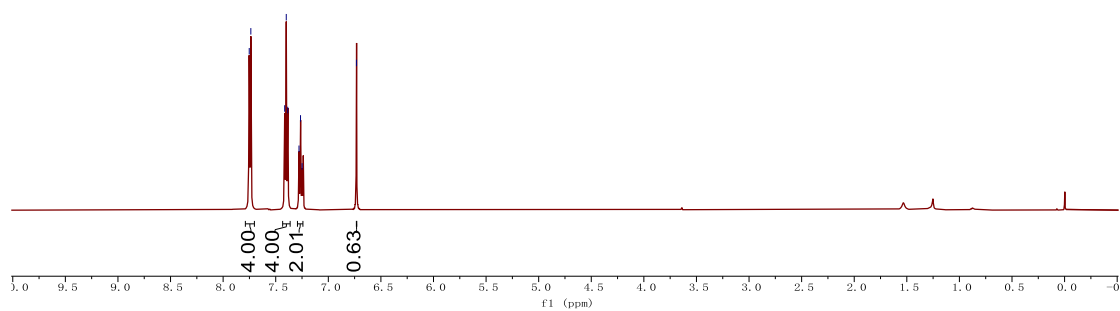

7.66  
7.65  
7.43  
7.41  
7.39  
7.32  
7.31  
7.29

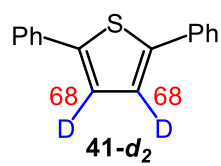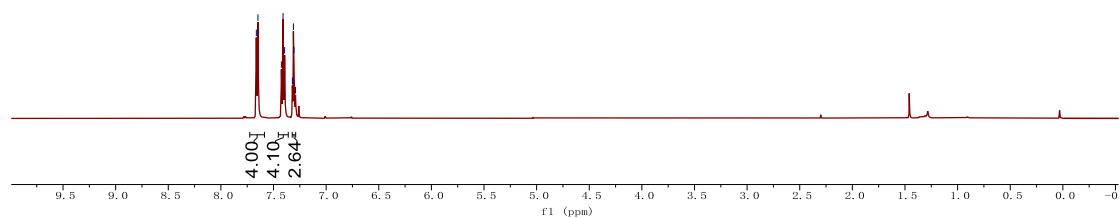

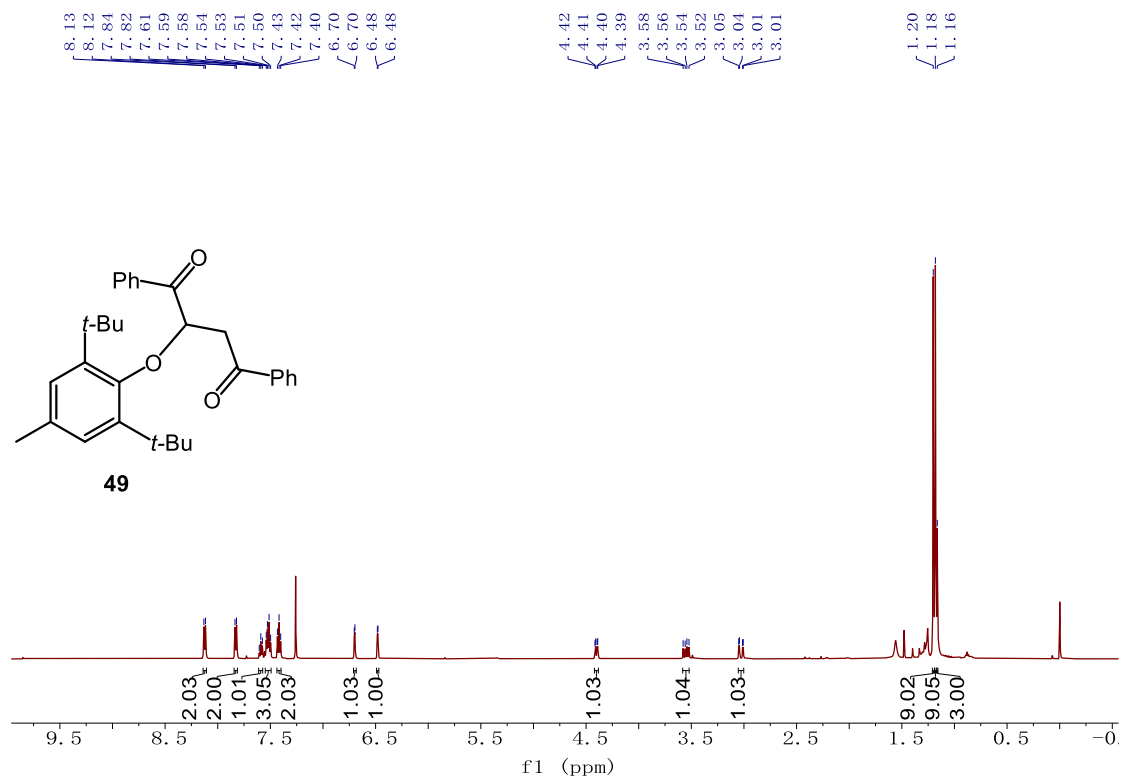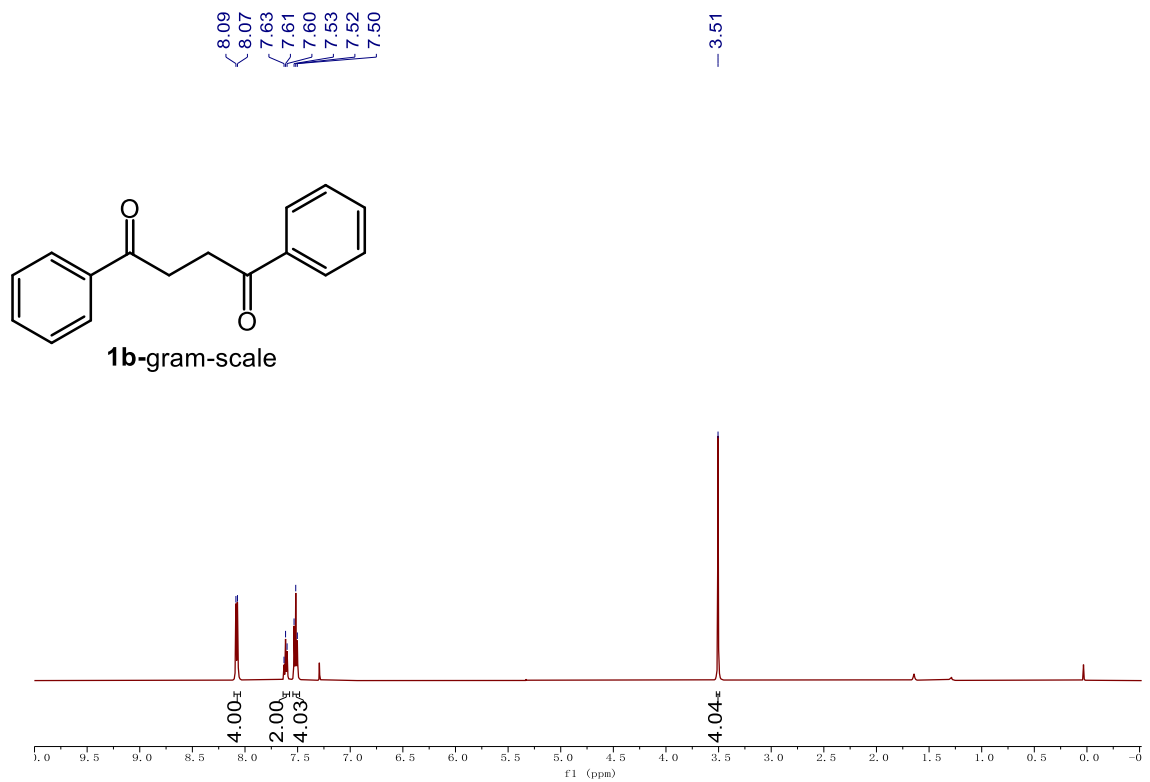

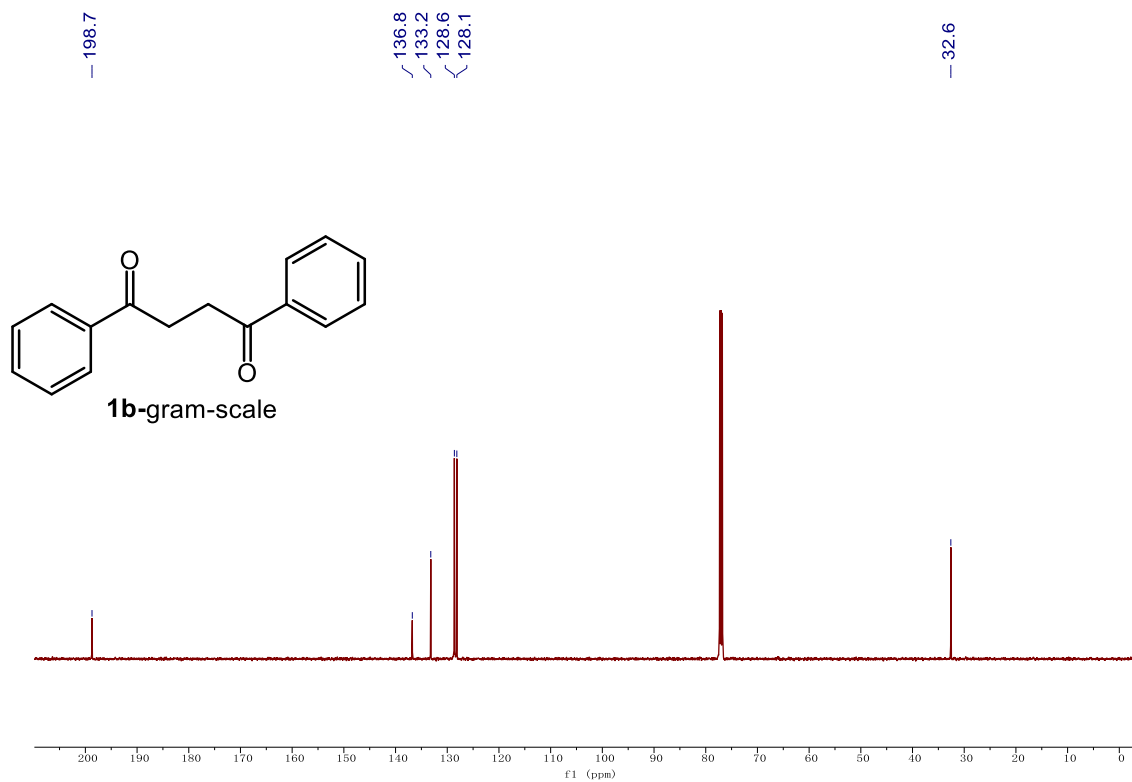

Supplement: d3ob01465g1.pdf [file d3ob01465g1.pdf]
